# Supplementary material for: Enhancer-targeted genome editing selectively blocks innate resistance to oncokinase inhibition
Source: HighWire-hosted journal article supplement (doi:10.1101/gr.166231.113), 2014-01-17
Supplement: Supplemental_Legends.docx [file Supplemental_Legends.docx]

**SUPPLEMENTARY FIGURE AND TABLE LEGENDS**

Supplementary Figure 1. A, Total number of lineage-specific DNaseI Hypersensitive Sites (DHS) at the MET locus in selected lineages B, Enhancer activity of the *MET* +63kb enhancer in primary human cells relative to empty enhancer reporter lentiviral vecter in matched cell type population.

Supplementary Figure 2. A, Validation of BRAFV600E overexpression and signaling activation as measured by ERK1/2 phosphorylation Western blots in primary human melanocytes. B, Validation of BRAFV600E signaling inhibition by PLX4032 in COLO829 melanoma cells. C, Top Gene Ontology (GO) terms for genes associated with MITF peaks in melanocytes.

Supplementary Figure 3. A, *MET* expression levels in COLO829 cells as a function of PLX4032 or DMSO control, with MITF depletion and MET overexpression. b, Dose response curves for PLX4032 in the presence or absence of HGF in the experimental groups present in A.

Supplementary Figure 4. A, Western blot of MET protein in enhancer wildtype and enhancer edited COLO829 melanoma cells with DMSO and PLX4032 treatment. B, Regulation of additional MITF-dependent, BRAF-responsive melanocyte differentiation genes remains intact in enhancer edited cells relative to enhancer wildtype cells upon treatment with PLX4032.

Supplementary Figure 5. A, Schematic of the *MET* +63kb DHS TALEN targeting strategy; the Mbox sequence motif is shown in green. The wild-type (WT) normal allele found in COLO829 and an enhancer edited clone #2 (EC2) alleles are shown. Deep sequencing validated that no WT alleles remained in the EC2 clone. B, MITF ChIP-qPCR at the *MET* +63kb DHS of WT versus EC2 cells. C, H3K27ac ChIP-qPCR at the *MET* +63kb DHS of WT versus EC2 cells. D, 3C of WT versus EC2 cells at the *MET* locus (**p = 0.0040). E, Induction of *MLANA* and *MET* expression by PLX4032 in WT and EC2 cells. F, Viability of WT and EC2 cells in PLX4032 dose-response curve +/- exogenous HGF at 72 hours [top] quantification of the relative viability [bottom]. G, Longer-term viability of WT and EC2 cells in PLX4032 +/- exogenous HGF at 2 weeks.

Supplementary Table 1. Lineage classification and description of DNase-seq samples from ENCODE used in clustering analysis.

Supplementary Table 2. Primers used for 3C analysis of the *MET* locus.

Supplementary Table 3. FOCIS enrichment score algorithm and list of all current FOCIS features.

Supplementary Table 4. Genomic coordinates for MITF ChIP-seq peaks.

Supplementary Table 5. Differentially expressed genes with BRAF inhibition and MITF depletion in melanoma cells.

Supplementary Table 6. Primer sequences used in this study for qRT-PCR, ChIP, and cloning
