# Supplementary material for: Enhancer-targeted genome editing selectively blocks innate resistance to oncokinase inhibition
Source: HighWire-hosted journal article supplement (doi:10.1101/gr.166231.113), 2014-01-17
Supplement: Supplemental_Table1.xlsx [file Supplemental_Table1.xlsx]

## Sheet: Sheet1
Supplementary Table 1. Lineage classification and description of Dnase-seq samples from ENCODE used in clustering analysis
Additional datasets from cell types listed here but with different treatments are included in clustering analysis for a total of 100 samples.
ENCODE DHS Cell Type	Lineage Classification	Description
8988T	Liver	pancreas adenocarcinoma (PA-TU-8988T), "established in 1985 from the liver metastasis of a primary pancreatic adenocarcinoma from a 64-year-old woman" - DSMZ
A549	Lung	epithelial cell line derived from a lung carcinoma tissue. (PMID: 175022), "This line was initiated in 1972 by D.J. Giard, et al. through explant culture of lung carcinomatous tissue from a 58-year-old caucasian male." - ATCC, newly promoted to tier 2: not in 2011 analysis
Adult_CD4+_Th0	Lymphoid/T-cell	CD4+ cells isolated from human blood and enriched for Th0 populations
Adult_CD4+_Th1	Lymphoid/T-cell	CD4+ cells isolated from human blood and enriched for Th1 populations
AoSMC	Muscle	aortic smooth muscle cells
B_cells_CD20+_RO01794	Lymphoid	B cells, African American, draw number 1, newly promoted to tier 2: not in 2011 analysis
Cerebellum_OC	Neural	Primary frozen cerebellum tissue from NICHD donor IDs 1104 (Rep B1), 602 (Rep B2), 1442 (Rep B3), all Caucasian
Cerebrum_frontal_OC	Neural	Primary frozen frontal cerebrum tissue from NICHD donor IDs 1104 (Rep B1), 602 (Rep B2), 1442 (Rep B3), all Caucasian
Chorion	Embryonic_other	chorion cells (outermost of two fetal membranes), fetal membranes were collected from women who underwent planned cesarean delivery at term, before labor and without rupture of membranes.
CLL	Lymphoid/T-cell	chronic lymphocytic leukemia cell, T-cell lymphocyte
Colo829	Melanocyte	malignant melanoma
ECC-1	Endometrium	epithelial cell line derived from an endometrium adenocarcinoma, fetal membranes were collected from women who underwent planned cesarean delivery at term, before labor and without rupture of membranes
Fibrobl	Fibroblast	child fibroblast
Fibrobl_GM03348	Fibroblast	skin fibroblast
FibroP_AG08395	Fibroblast	skin fibroblast
FibroP_AG08396	Fibroblast	fibroblasts taken from individuals with Parkinson's disease
FibroP_AG20443	lung_fibroblast	fibroblasts taken from individuals with Parkinson's disease
Frontal_cortex_OC	Neural	Primary ventromedial prefrontal cortex, from KPBBB donor IDs 673 (Rep B1) and 913 (Rep B2)
GC_B_cell	Lymphoid	Germinal center B cells (CD77+) isolated from de-identified tonsillectomy
Gliobla	Glial	glioblastoma, these cells (aka H54 and D54) come from a surgical resection from a patient with glioblastoma multiforme (WHO Grade IV). D54 is a commonly studied glioblastoma cell line (Bao et al., 2006) that has been thoroughly described by S Bigner (1981). (PMID: 7252524)
GM10248	Lymphoid	lymphoblastoid cell line, Clinically normal; 4 paternal cousins have Cornelia de Lange syndrome; 46,XY, t(3;22)(q25.3;p12)
GM10266	Lymphoid	lymphoblastoid cell line, De Lange phenotype; developmental delay; profound retardation; seizures; 3 cousins are also affected; 46,XY,-22,+der (22)t(3;22)(q25.3;p12)
GM12878	Lymphoid	B-lymphocyte, lymphoblastoid, International HapMap Project - CEPH/Utah - European Caucasion, Epstein-Barr Virus
GM12891	Lymphoid	B-lymphocyte, lymphoblastoid, International HapMap Project, CEPH/Utah pedigree 1463, treatment: Epstein-Barr Virus transformed
GM12892	Lymphoid	B-lymphocyte, lymphoblastoid, International HapMap Project, CEPH/Utah pedigree 1463, treatment: Epstein-Barr Virus transformed
GM13976	Lymphoid	lymphoblastoid cell line, clinically normal; monozygotic twin sister with Cornelia De Lange syndrome is GM13977
GM13977	Lymphoid	lymphoblastoid cell line, Clinically affected; microcephaly; low frontal hairline; synophris; "penciled" arched eyebrows; short nose; crescent shaped mouth; hirsutism; micromelia; short thumbs; mental retardation; clinically normal monozygotic twin sister is GM13976
GM18507	Lymphoid	lymphoblastoid, International HapMap Project, Yoruba in Ibadan, Nigera, treatment: Epstein-Barr Virus transformed
GM19238	Lymphoid	B-lymphocyte, lymphoblastoid, International HapMap Project, Yoruba in Ibadan, Nigera, treatment: Epstein-Barr Virus transformed
GM19239	Lymphoid	B-lymphocyte, lymphoblastoid, International HapMap Project, Yoruba in Ibadan, Nigera, treatment: Epstein-Barr Virus transformed
GM19240	Lymphoid	B-lymphocyte, lymphoblastoid, International HapMap Project, Yoruba in Ibadan, Nigera, treatment: Epstein-Barr Virus transformed
GM20000	Lymphoid	lymphoblastoid cell line, De Lange phenotype; developmental delay; profound retardation
H1-hESC	Esc/iPS	embryonic stem cells
H7-hESC	Esc/iPS	undifferentiated embryonic stem cells
H9ES	Esc/iPS	embryonic stem cell (hESC) H9
Heart_OC	Muscle	Primary frozen heart tissue from NICHD donor IDs 1104 (Rep B1 DNase), 602 (Rep B2 DNase), 1442 (Rep B3 DNase), 1863 (Rep B1 FAIRE), 4548 (Rep B2 FAIRE)
HEK293T	Epithelial	embryonic kidney that expresses SV40 large T antigen, HEK293 (ATCC number CRL-1573) is the parental cell line
HeLa-S3	Epithelial	cervical carcinoma
Hepatocytes	Liver	primary hepatocytes, liver perfused by enzymes to generate single cell suspension
HepG2	Liver	hepatocellular carcinoma
HMEC	Epithelial	mammary epithelial cells
HPDE6-E6E7	Pancreas	pancreatic duct cells immortalized with E6E7 gene of HPV
HSMM	Muscle	skeletal muscle myoblasts
HSMM_emb	Muscle	embryonic myoblast
HSMM_FSHD	Muscle	primary myoblast from Facioscapulohumeral Muscular Dystrophy (FSHD) patients, muscle needle biopsies
HSMMtube	Muscle	skeletal muscle myotubes differentiated from the HSMM cell line
HTR8svn	Embryonic_other	trophoblast (HTR-8/SVneo) cell line, a thin layer of ectoderm that forms the wall of many mammalian blastulas and functions in the nutrition and implantation of the embryo
Huh-7	Liver	hepatocellular carcinoma
Huh-7.5	Liver	hepatocellular carcinoma, hepatocytes selected for high levels of hepatitis C replication
HUVEC	Endothelial	umbilical vein endothelial cells
IMR90	lung_fibroblast	fetal lung fibroblasts, newly promoted to tier 2: not in 2011 analysis
iPS_CWRU1	Esc/iPS	iPS cells derived from MSC658 fibroblast
iPS_NIHi11	Esc/iPS	iPS cells derived from AG20443 fibroblast
iPS_NIHi7	Esc/iPS	iPS cells derived from AG08395 fibroblast
Ishikawa	Endometrium	endometrial adenocarcinoma
K562	Myeloid	Leukemia, "The continuous cell line K-562 was established by Lozzio and Lozzio from the pleural effusion of a 53-year-old female with chronic myelogenous leukemia in terminal blast crises." - ATCC
LNCaP	Prostate	prostate adenocarcinoma, "LNCaP clone FGC was isolated in 1977 by J.S. Horoszewicz, et al., from a needle aspiration biopsy of the left supraclavicular lymph node of a 50-year-old caucasian male (blood type B+) with confirmed diagnosis of metastatic prostate carcinoma." - ATCC. (Horoszewicz et al. LNCaP Model of Human Prostatic Carcinoma. Cancer Research 43, 1809-1818, April 1983.)
MCF-7	Breast	mammary gland, adenocarcinoma. (PMID: 4357757), newly promoted to tier 2: not in 2011 analysis
Medullo	Neural	medulloblastoma (aka D721), surgical resection from a patient with medulloblastoma as described by Darrell Bigner (1997)
Medullo_D341	Neural	Medulloblastoma cell line of neuron or neuron precurosr origin
Mel_2183	Melanocyte	Melanoma Cell line
Melano	Melanocyte	epidermal melanocytes
Monocytes_CD14+	Monocytes	Monocytes-CD14+ are CD14-positive cells from human leukapheresis production, from donor RO 01746 (draw 1 ID is RO 01746, draw 2 ID is RO 01826), newly promoted to tier 2: not in 2011 analysis
Myometr	Myometrium	myometrial cells
Naive_B_cell	Lymphoid	Naive B cells (IgD+) isolated from de-identified tonsillectomy
NHEK	Epithelial	epidermal keratinocytes
Olfactory_neurosphere	Neural	Human olfactory neurosphere-derived cells from mucosal biopsies
Osteoblasts	Bone	osteoblasts (NHOst)
PanIsletD	Pancreas	dedifferentiated human pancreatic islets from the National Disease Research Interchange (NDRI), same source as PanIslets
PanIslets	Pancreas	pancreatic islets from 2 donors, the sources of these primary cells are cadavers from National Disease Research Interchange (NDRI) and another sample isolated as in Bucher, P. et al., Assessment of a novel two-component enzyme preparation for human islet isolation and transplantation. Transplantation 79, 917 (2005)
pHTE	Epithelial	primary tracheal epithelial cells
ProgFib	Fibroblast	fibroblasts, Hutchinson-Gilford progeria syndrome (cell line HGPS, HGADFN167, progeria research foundation)
Psoas_muscle_OC	Muscle	Primary frozen psoas muscle tissue from NICHD donor IDs 1104 (Rep B1 DNase), 602 (Rep B2 DNase), 1442 (Rep B3 DNase), 1540 (Rep B1), 1863 (Rep B2 FAIRE)
RWPE1	Epithelial	prostate epithelial
SK-N-SH	Neural	neuroblastoma, newly promoted to tier 2: not in 2011 analysis, the SK-N-SH line was established from a neuroblastoma in a 4 year old individual.
Stellate	Liver	hepatic stellate cells, liver that was perfused with collagenase and sellected for hepatic stellate cells by density gradient
T-47D	Breast	epithelial cell line derived from a mammary ductal carcinoma.
Urothelia	Epithelial	primary ureter cell culture of urothelial cells derived from a 12 year-old girl and immortalized by transfection with a temperature-sensitive SV-40 large T antigen gene
