# Supplementary material for: Enhancer-targeted genome editing selectively blocks innate resistance to oncokinase inhibition
Source: HighWire-hosted journal article supplement (doi:10.1101/gr.166231.113), 2014-01-17
Supplement: Supplemental_Table2.xlsx [file Supplemental_Table2.xlsx]

## Sheet: Sheet1
Supplementary Table 2
Primers used for 3C analysis of the MET Locus
ApoI MET 3C-qPCR Primers			Chromosome 7 (hg19)
Name	Forward Primer (5'-3')	Anchor Reverse Primer (5'-3')	Start	Stop	Amp. Coefficient	Linearity R2
MET - 12 kb 3C	gcaggaaataaaagcccacagg	A1	116301055	116301076	1.997	0.998
MET 0 (Promoter) 3C	agccgagctgtttccttgtt	A2	116312998	116313017	1.985	0.989
MET + 11 kb 3C	acacacacatcaggcatcct	A3	116323537	116323556	1.994	0.996
MET + 22 kb 3C	attccctctaccagcaccaa	A1	116335383	116335402	1.978	0.984
MET + 52 kb 3C	ggctccgtggataagcctta	A3	116364538	116364557	1.978	0.984
MET + 60 kb 3C	tggtgcctttaacatgagttgt	A3	116372607	116372628	1.999	0.999
MET +63 kb Enhancer Anchor Primers			Start	Stop
A1	ccctttcgcctctccaagtt		116375273	116375292
A2	cacccactcatcactcctgtt		116375308	116375328
A3	accacccactcatcactcct		116375306	116375325
ApoI MET Digest Efficiency Primers			Chromosome 7 (hg19)
Name	Forward Primer (5'-3')	Reverse Primer (5'-3')	Start	Stop	Amp. Coefficient	Linearity R2
MET - 12 kb Digest Efficiency	gcaggaaataaaagcccacagg	ttctttcttgctctgaaaattacc	116301143	116301166	1.99253	0.9946
MET 0 (Promoter) Digest Efficiency	agccgagctgtttccttgtt	accacaagccccagaaagag	116313144	116313163	1.98481	0.989
MET + 11 kb Digest Efficiency	acacacacatcaggcatcct	ggcatgtggtacagactgct	116323700	116323719	1.9964	0.9974
MET + 22 kb Digest Efficiency	attccctctaccagcaccaa	tgcttgctattttatctgtaattctca	116335429	116335455	1.99626	0.9973
MET + 52 kb Digest Efficiency	ggctccgtggataagcctta	ctaccgggtggcttccaaaa	116364757	116364776	1.99294	0.9949
MET + 60 kb Digest Efficiency	tggtgcctttaacatgagttgt	atgatcaatatccaggctgctat	116372870	116372892	1.99259	0.999
MET + 63 kb (Enhancer) Digest Efficiency	ccctttcgcctctccaagtt	tgaagacaggaggtcaacag	116375509	116375528	1.9946	0.9961
