# Supplementary material for: Enhancer-targeted genome editing selectively blocks innate resistance to oncokinase inhibition
Source: HighWire-hosted journal article supplement (doi:10.1101/gr.166231.113), 2014-01-17
Supplement: Supplemental_Table3.xlsx [file Supplemental_Table3.xlsx]

## Sheet: Sheet1
Supplementary Table 3
FOCIS enrichment score algorithm and list of all current FOCIS features.
FOCIS enrichment score algorithm
Enrichment score for a given feature = log2( (subset overlap with feature intervals / subset interval total ) / (background overlap with feature intervals / background interval total) ) && score = 0 if subset overlap / subset total < Threshold (threshold = 0.01 for this study)
FOCIS source code is freely available at http://sourceforge.net/projects/focis/
List of all current FOCIS features
ENCODE Histone Mark ChIP-seq
(for abbreviation details, see http://genome.ucsc.edu/ENCODE/downloads.html)
Cell Type	ChIP-seq Feature
Gm12878	H2az
Gm12878	H3k27ac
Gm12878	H3k27me3
Gm12878	H3k36me3
Gm12878	H3k4me1
Gm12878	H3k4me2
Gm12878	H3k4me3
Gm12878	H3k79me2
Gm12878	H3k9ac
Gm12878	H3k9me3
Gm12878	H4k20me1
H1hesc	H3k27ac
H1hesc	H3k27me3
H1hesc	H3k36me3
H1hesc	H3k4me1
H1hesc	H3k4me2
H1hesc	H3k4me3
H1hesc	H3k9ac
H1hesc	H4k20me1
Helas3	H3k27ac
Helas3	H3k27me3
Helas3	H3k36me3
Helas3	H3k4me2
Helas3	H3k4me3
Helas3	H3k79me2
Helas3	H3k9ac
Helas3	H4k20me1
Hepg2	H2az
Hepg2	H3k27ac
Hepg2	H3k27me3
Hepg2	H3k36me3
Hepg2	H3k4me2
Hepg2	H3k4me3
Hepg2	H3k79me2
Hepg2	H3k9ac
Hepg2	H4k20me1
Hmec	H3k27ac
Hmec	H3k27me3
Hmec	H3k36me3
Hmec	H3k4me1
Hmec	H3k4me2
Hmec	H3k4me3
Hmec	H3k9ac
Hmec	H4k20me1
Hsmm	H2az
Hsmm	H3k27ac
Hsmm	H3k27me3
Hsmm	H3k36me3
Hsmm	H3k4me1
Hsmm	H3k4me2
Hsmm	H3k4me3
Hsmm	H3k79me2
Hsmm	H3k9ac
Hsmm	H3k9me3
Hsmm	H4k20me1
Hsmmt	H2az
Hsmmt	H3k27ac
Hsmmt	H3k36me3
Hsmmt	H3k4me1
Hsmmt	H3k4me2
Hsmmt	H3k4me3
Hsmmt	H3k79me2
Hsmmt	H3k9ac
Hsmmt	H4k20me1
Huvec	H3k27ac
Huvec	H3k27me3
Huvec	H3k36me3
Huvec	H3k4me1
Huvec	H3k4me2
Huvec	H3k4me3
Huvec	H3k9ac
Huvec	H4k20me1
K562	H2az
K562	H3k27ac
K562	H3k27me3
K562	H3k36me3
K562	H3k4me1
K562	H3k4me2
K562	H3k4me3
K562	H3k79me2
K562	H3k9ac
K562	H3k9me3
K562	H4k20me1
Nha	H3k27ac
Nha	H3k27me3
Nha	H3k36me3
Nha	H3k4me1
Nha	H3k4me3
Nhdfad	H3k27ac
Nhdfad	H3k27me3
Nhdfad	H3k36me3
Nhdfad	H3k4me2
Nhdfad	H3k4me3
Nhdfad	H3k9ac
Nhek	H3k27ac
Nhek	H3k27me3
Nhek	H3k36me3
Nhek	H3k4me1
Nhek	H3k4me2
Nhek	H3k4me3
Nhek	H3k9ac
Nhek	H3k9me1
Nhek	H4k20me1
Nhlf	H3k27ac
Nhlf	H3k27me3
Nhlf	H3k36me3
Nhlf	H3k4me1
Nhlf	H3k4me2
Nhlf	H3k4me3
Nhlf	H3k9ac
Nhlf	H4k20me1
Osteobl	H2az
Osteobl	H3k27ac
Osteobl	H3k36me3
Osteobl	H3k4me1
Osteobl	H3k4me2
Osteobl	H3k9me3
K562	H3k27me3
K562	H3k4me1
K562	H3k4me3
K562	H3k9acb
Nt2d1	H3k27me3
Nt2d1	H3k36me3b
Nt2d1	H3k4me1
Nt2d1	H3k4me3
Nt2d1	H3k9ac
Nt2d1	H3k9me3
U2os	H3k9me3
Ag04449	H3k4me3
Ag04450	H3k4me3
Ag09309	H3k4me3
Ag09319	H3k4me3
Ag10803	H3k4me3
Aoaf	H3k4me3
Bj	H3k27me3
Bj	H3k36me3
Bj	H3k4me3
Caco2	H3k27me3
Caco2	H3k36me3
Caco2	H3k4me3
Gm06990	H3k27me3
Gm06990	H3k36me3
Gm06990	H3k4me3
Gm12878	H3k27me3
Gm12878	H3k36me3
Gm12878	H3k4me3
H7es	H3k27me3
H7es	H3k36me3
H7es	H3k4me3
Hasp	H3k4me3
Hbmec	H3k4me3
Hcf	H3k4me3
Hcm	H3k4me3
Hcpe	H3k4me3
Hct116	H3k4me3
Hee	H3k4me3
Hek293	H3k4me3
Helas3	H3k27me3
Helas3	H3k36me3
Helas3	H3k4me3
Hepg2	H3k27me3
Hepg2	H3k36me3
Hepg2	H3k4me3
Hl60	H3k4me3
Hmec	H3k4me3
Hmf	H3k4me3
Hpaf	H3k4me3
Hpf	H3k4me3
Hre	H3k27me3
Hre	H3k36me3
Hre	H3k4me3
Hrpe	H3k4me3
Huvec	H3k27me3
Huvec	H3k36me3
Huvec	H3k4me3
Hvmf	H3k4me3
Jurkat	H3k4me3
K562	H3k27me3
K562	H3k36me3
K562	H3k4me3
Nhdfneo	H3k4me3
Nhek	H3k27me3
Nhek	H3k36me3
Nhek	H3k4me3
Saec	H3k27me3
Saec	H3k36me3
Saec	H3k4me3
Sknshra	H3k27me3
Sknshra	H3k36me3
Sknshra	H3k4me3
ENCODE TF ChIP-seq (SPP)
(for abbreviation details, see http://genome.ucsc.edu/ENCODE/downloads.html)
Cell Type	ChIP-seq Feature
Gm12878	Ctcf
Gm12878	Ctcf
H1hesc	Ctcf
H1hesc	Ctcf
Helas3	Ctcf
Helas3	Ctcf
Helas3	Pol2b
Helas3	Pol2b
Hepg2	Ctcf
Hepg2	Ctcf
Hmec	Ctcf
Hmec	Ctcf
Hsmm	Ctcf
Hsmm	Ctcf
Hsmmt	Ctcf
Hsmmt	Ctcf
Huvec	Ctcf
Huvec	Ctcf
Huvec	Pol2b
Huvec	Pol2b
K562	Ctcf
K562	Ctcf
K562	Pol2b
K562	Pol2b
Nha	Ctcf
Nha	Ctcf
Nhdfad	Ctcf
Nhdfad	Ctcf
Nhek	Ctcf
Nhek	Ctcf
Nhek	Pol2b
Nhek	Pol2b
Nhlf	Ctcf
Nhlf	Ctcf
Osteobl	Ctcf
Osteobl	Ctcf
A549	CtcfPcr1xDexa
A549	CtcfPcr1xDexa
A549	CtcfPcr1xEtoh02
A549	CtcfPcr1xEtoh02
A549	GrPcr1xDexb
A549	GrPcr1xDexb
A549	GrPcr1xDexc
A549	GrPcr1xDexc
A549	GrPcr1xDexd
A549	GrPcr1xDexd
A549	GrPcr2xDexa
A549	GrPcr2xDexa
A549	Pol2Pcr2xDexa
A549	Pol2Pcr2xDexa
A549	Pol2Pcr2xEtoh02
A549	Pol2Pcr2xEtoh02
A549	Usf1Pcr1xDexa
A549	Usf1Pcr1xDexa
A549	Usf1Pcr1xEtoh02
A549	Usf1Pcr1xEtoh02
Ecc1	EralphaaV0416102Estradia1h
Ecc1	EralphaaV0416102Estradia1h
Ecc1	EralphaaV0416102Gen1h
Ecc1	EralphaaV0416102Gen1h
Ecc1	Foxa1c20V0416102Dmso2
Ecc1	Foxa1c20V0416102Dmso2
Ecc1	GrV0416102Dexa
Ecc1	GrV0416102Dexa
Ecc1	Pol2V0416102Dmso2
Ecc1	Pol2V0416102Dmso2
Gm12878	Atf3Pcr1x
Gm12878	Atf3Pcr1x
Gm12878	BatfPcr1x
Gm12878	BatfPcr1x
Gm12878	Bcl11aPcr1x
Gm12878	Bcl11aPcr1x
Gm12878	Bcl3Pcr1x
Gm12878	Bcl3Pcr1x
Gm12878	Bclaf1m33V0416101
Gm12878	Bclaf1m33V0416101
Gm12878	Ebf1c8Pcr1x
Gm12878	Ebf1c8Pcr1x
Gm12878	EbfPcr1x
Gm12878	EbfPcr1x
Gm12878	Egr1Pcr2x
Gm12878	Egr1Pcr2x
Gm12878	Egr1V0416101
Gm12878	Egr1V0416101
Gm12878	Elf1sc631V0416101
Gm12878	Elf1sc631V0416101
Gm12878	Ets1Pcr1x
Gm12878	Ets1Pcr1x
Gm12878	GabpPcr2x
Gm12878	GabpPcr2x
Gm12878	Irf4Pcr1x
Gm12878	Irf4Pcr1x
Gm12878	Irf4m17Pcr1x
Gm12878	Irf4m17Pcr1x
Gm12878	Mef2aPcr1x
Gm12878	Mef2aPcr1x
Gm12878	Mef2csc13268Pcr1x
Gm12878	Mef2csc13268Pcr1x
Gm12878	NrsfPcr2x
Gm12878	NrsfPcr2x
Gm12878	Oct2Pcr1x
Gm12878	Oct2Pcr1x
Gm12878	P300Pcr1x
Gm12878	P300Pcr1x
Gm12878	Pax5c20Pcr1x
Gm12878	Pax5c20Pcr1x
Gm12878	Pax5n19Pcr1x
Gm12878	Pax5n19Pcr1x
Gm12878	Pbx3Pcr1x
Gm12878	Pbx3Pcr1x
Gm12878	Pol24h8Pcr1x
Gm12878	Pol24h8Pcr1x
Gm12878	Pol2Pcr2x
Gm12878	Pol2Pcr2x
Gm12878	Pou2f2Pcr1x
Gm12878	Pou2f2Pcr1x
Gm12878	Pu1Pcr1x
Gm12878	Pu1Pcr1x
Gm12878	Rad21V0416101
Gm12878	Rad21V0416101
Gm12878	RxraPcr1x
Gm12878	RxraPcr1x
Gm12878	Sin3ak20Pcr1x
Gm12878	Sin3ak20Pcr1x
Gm12878	Six5Pcr1x
Gm12878	Six5Pcr1x
Gm12878	Sp1Pcr1x
Gm12878	Sp1Pcr1x
Gm12878	SrfPcr2x
Gm12878	SrfPcr2x
Gm12878	SrfV0416101
Gm12878	SrfV0416101
Gm12878	Taf1Pcr1x
Gm12878	Taf1Pcr1x
Gm12878	Tcf12Pcr1x
Gm12878	Tcf12Pcr1x
Gm12878	Usf1Pcr2x
Gm12878	Usf1Pcr2x
Gm12878	Yy1V0416101
Gm12878	Yy1V0416101
Gm12878	Zbtb33Pcr1x
Gm12878	Zbtb33Pcr1x
Gm12878	Zeb1sc25388V0416102
Gm12878	Zeb1sc25388V0416102
Gm12891	Oct2Pcr1x
Gm12891	Oct2Pcr1x
Gm12891	Pax5c20Pcr1x
Gm12891	Pax5c20Pcr1x
Gm12891	Pol24h8Pcr1x
Gm12891	Pol24h8Pcr1x
Gm12891	Pol2Pcr1x
Gm12891	Pol2Pcr1x
Gm12891	Pou2f2Pcr1x
Gm12891	Pou2f2Pcr1x
Gm12891	Pu1Pcr1x
Gm12891	Pu1Pcr1x
Gm12891	Taf1Pcr1x
Gm12891	Taf1Pcr1x
Gm12891	Yy1c20V0416101
Gm12891	Yy1c20V0416101
Gm12892	Pax5c20Pcr1x
Gm12892	Pax5c20Pcr1x
Gm12892	Pol24h8Pcr1x
Gm12892	Pol24h8Pcr1x
Gm12892	Pol24h8V0416102
Gm12892	Pol24h8V0416102
Gm12892	Pol2Pcr1x
Gm12892	Pol2Pcr1x
Gm12892	Pol2V0416102
Gm12892	Pol2V0416102
Gm12892	Taf1Pcr1x
Gm12892	Taf1Pcr1x
Gm12892	Taf1V0416102
Gm12892	Taf1V0416102
Gm12892	Yy1V0416101
Gm12892	Yy1V0416101
H1hesc	Atf3Pcr1x
H1hesc	Atf3Pcr1x
H1hesc	Bcl11aPcr1x
H1hesc	Bcl11aPcr1x
H1hesc	Bcl3Pcr1x
H1hesc	Bcl3Pcr1x
H1hesc	Ctcfsc5916V0416102
H1hesc	Ctcfsc5916V0416102
H1hesc	Egr1V0416101
H1hesc	Egr1V0416101
H1hesc	Egr1V0416102
H1hesc	Egr1V0416102
H1hesc	GabpPcr1x
H1hesc	GabpPcr1x
H1hesc	Hdac2sc6296V0416102
H1hesc	Hdac2sc6296V0416102
H1hesc	JundV0416102
H1hesc	JundV0416102
H1hesc	Nanogsc33759V0416102
H1hesc	Nanogsc33759V0416102
H1hesc	NrsfPcr1x
H1hesc	NrsfPcr1x
H1hesc	NrsfV0416102
H1hesc	NrsfV0416102
H1hesc	P300Pcr1x
H1hesc	P300Pcr1x
H1hesc	Pol24h8Pcr1x
H1hesc	Pol24h8Pcr1x
H1hesc	Pol24h8V0416102
H1hesc	Pol24h8V0416102
H1hesc	Pol2Pcr1x
H1hesc	Pol2Pcr1x
H1hesc	Pol2V0416102
H1hesc	Pol2V0416102
H1hesc	Pou5f1sc9081V0416102
H1hesc	Pou5f1sc9081V0416102
H1hesc	Rad21V0416102
H1hesc	Rad21V0416102
H1hesc	RxraV0416102
H1hesc	RxraV0416102
H1hesc	Sin3ak20Pcr1x
H1hesc	Sin3ak20Pcr1x
H1hesc	Six5Pcr1x
H1hesc	Six5Pcr1x
H1hesc	Sp1Pcr1x
H1hesc	Sp1Pcr1x
H1hesc	SrfPcr1x
H1hesc	SrfPcr1x
H1hesc	Taf1Pcr1x
H1hesc	Taf1Pcr1x
H1hesc	Taf1V0416102
H1hesc	Taf1V0416102
H1hesc	Taf7sq8V0416102
H1hesc	Taf7sq8V0416102
H1hesc	Tcf12Pcr1x
H1hesc	Tcf12Pcr1x
H1hesc	Usf1Pcr1x
H1hesc	Usf1Pcr1x
H1hesc	Yy1c20Pcr1x
H1hesc	Yy1c20Pcr1x
Hct116	Pol24h8V0416101
Hct116	Pol24h8V0416101
Helas3	GabpPcr1x
Helas3	GabpPcr1x
Helas3	NrsfPcr1x
Helas3	NrsfPcr1x
Helas3	Pol2Pcr1x
Helas3	Pol2Pcr1x
Helas3	Taf1Pcr1x
Helas3	Taf1Pcr1x
Hepg2	Atf3Pcr1x
Hepg2	Atf3Pcr1x
Hepg2	Bhlhe40V0416101
Hepg2	Bhlhe40V0416101
Hepg2	CtcfV0416101
Hepg2	CtcfV0416101
Hepg2	Elf1sc631V0416101
Hepg2	Elf1sc631V0416101
Hepg2	Fosl2Pcr1x
Hepg2	Fosl2Pcr1x
Hepg2	Foxa1c20Pcr1x
Hepg2	Foxa1c20Pcr1x
Hepg2	Foxa1sc101058Pcr1x
Hepg2	Foxa1sc101058Pcr1x
Hepg2	Foxa2sc6554V0416101
Hepg2	Foxa2sc6554V0416101
Hepg2	GabpPcr2x
Hepg2	GabpPcr2x
Hepg2	Hdac2sc6296V0416101
Hepg2	Hdac2sc6296V0416101
Hepg2	Hey1V0416101
Hepg2	Hey1V0416101
Hepg2	Hnf4ah171Pcr1x
Hepg2	Hnf4ah171Pcr1x
Hepg2	Hnf4gsc6558V0416101
Hepg2	Hnf4gsc6558V0416101
Hepg2	JundPcr1x
Hepg2	JundPcr1x
Hepg2	NrsfPcr2x
Hepg2	NrsfPcr2x
Hepg2	P300Pcr1x
Hepg2	P300Pcr1x
Hepg2	P300V0416101
Hepg2	P300V0416101
Hepg2	Pol2Pcr2x
Hepg2	Pol2Pcr2x
Hepg2	Rad21V0416101
Hepg2	Rad21V0416101
Hepg2	RxraPcr1x
Hepg2	RxraPcr1x
Hepg2	Sin3ak20Pcr1x
Hepg2	Sin3ak20Pcr1x
Hepg2	Sp1Pcr1x
Hepg2	Sp1Pcr1x
Hepg2	SrfV0416101
Hepg2	SrfV0416101
Hepg2	Taf1Pcr2x
Hepg2	Taf1Pcr2x
Hepg2	Tcf12Pcr1x
Hepg2	Tcf12Pcr1x
Hepg2	Usf1Pcr1x
Hepg2	Usf1Pcr1x
Hepg2	Zbtb33Pcr1x
Hepg2	Zbtb33Pcr1x
Hepg2	Zbtb33V0416101
Hepg2	Zbtb33V0416101
Htb11	NrsfPcr2x
Htb11	NrsfPcr2x
K562	Bcl3Pcr1x
K562	Bcl3Pcr1x
K562	Bclaf1m33Pcr1x
K562	Bclaf1m33Pcr1x
K562	Ctcflsc98982V0416101
K562	Ctcflsc98982V0416101
K562	E2f6h50V0416102
K562	E2f6h50V0416102
K562	Egr1V0416101
K562	Egr1V0416101
K562	Elf1sc631V0416102
K562	Elf1sc631V0416102
K562	Ets1V0416101
K562	Ets1V0416101
K562	Fosl1sc183V0416101
K562	Fosl1sc183V0416101
K562	GabpV0416101
K562	GabpV0416101
K562	Gata2cg2Pcr1x
K562	Gata2cg2Pcr1x
K562	Hdac2sc6296V0416102
K562	Hdac2sc6296V0416102
K562	Hey1Pcr1x
K562	Hey1Pcr1x
K562	MaxV0416102
K562	MaxV0416102
K562	NrsfV0416102
K562	NrsfV0416102
K562	Pol24h8Pcr1x
K562	Pol24h8Pcr1x
K562	Pol24h8V0416101
K562	Pol24h8V0416101
K562	Pol2V0416101
K562	Pol2V0416101
K562	Pu1Pcr1x
K562	Pu1Pcr1x
K562	Rad21V0416102
K562	Rad21V0416102
K562	Sin3ak20V0416101
K562	Sin3ak20V0416101
K562	Six5Pcr1x
K562	Six5Pcr1x
K562	Sp1Pcr1x
K562	Sp1Pcr1x
K562	Sp2sc643V0416102
K562	Sp2sc643V0416102
K562	SrfV0416101
K562	SrfV0416101
K562	Taf1Pcr1x
K562	Taf1Pcr1x
K562	Taf1V0416101
K562	Taf1V0416101
K562	Taf7sq8V0416101
K562	Taf7sq8V0416101
K562	Thap1sc98174V0416101
K562	Thap1sc98174V0416101
K562	Usf1V0416101
K562	Usf1V0416101
K562	Yy1V0416101
K562	Yy1V0416101
K562	Yy1V0416102
K562	Yy1V0416102
K562	Zbtb33Pcr1x
K562	Zbtb33Pcr1x
K562	Zbtb7asc34508V0416101
K562	Zbtb7asc34508V0416101
Panc1	NrsfPcr2x
Panc1	NrsfPcr2x
Pfsk1	NrsfPcr2x
Pfsk1	NrsfPcr2x
Sknshra	CtcfV0416102
Sknshra	CtcfV0416102
Sknshra	P300V0416102
Sknshra	P300V0416102
Sknshra	Rad21V0416102
Sknshra	Rad21V0416102
Sknshra	Usf1sc8983V0416102
Sknshra	Usf1sc8983V0416102
Sknshra	Yy1c20V0416102
Sknshra	Yy1c20V0416102
T47d	Ctcfsc5916V0416102Dmso2
T47d	Ctcfsc5916V0416102Dmso2
T47d	EralphaaPcr2xGen1h
T47d	EralphaaPcr2xGen1h
T47d	EralphaaV0416102Estradia1h
T47d	EralphaaV0416102Estradia1h
T47d	Foxa1c20V0416102Dmso2
T47d	Foxa1c20V0416102Dmso2
T47d	Gata3sc268V0416102Dmso2
T47d	Gata3sc268V0416102Dmso2
T47d	P300V0416102Dmso2
T47d	P300V0416102Dmso2
U87	NrsfPcr2x
U87	NrsfPcr2x
Fibrobl	Ctcf
Fibrobl	Ctcf
Gliobla	Ctcf
Gliobla	Ctcf
Gliobla	Pol2
Gliobla	Pol2
Gm12878	Cmyc
Gm12878	Cmyc
Gm12878	Ctcf
Gm12878	Ctcf
Gm12878	Pol2
Gm12878	Pol2
Helas3	Cmyc
Helas3	Cmyc
Helas3	Ctcf
Helas3	Ctcf
Helas3	Pol2
Helas3	Pol2
Hepg2	Cmyc
Hepg2	Cmyc
Hepg2	Ctcf
Hepg2	Ctcf
Hepg2	Pol2
Hepg2	Pol2
Huvec	Cmyc
Huvec	Cmyc
Huvec	Ctcf
Huvec	Ctcf
Huvec	Pol2
Huvec	Pol2
K562	Cmyc
K562	Cmyc
K562	Ctcf
K562	Ctcf
K562	Pol2
K562	Pol2
Mcf7	CmycEstro
Mcf7	CmycEstro
Mcf7	CmycVeh
Mcf7	CmycVeh
Mcf7	Ctcf
Mcf7	Ctcf
Mcf7	CtcfEstro
Mcf7	CtcfEstro
Mcf7	CtcfVeh
Mcf7	CtcfVeh
Mcf7	Pol2
Mcf7	Pol2
Progfib	Ctcf
Progfib	Ctcf
Progfib	Pol2
Progfib	Pol2
Gm10847	NfkbIggrab
Gm10847	NfkbIggrab
Gm10847	Pol2Iggmus
Gm10847	Pol2Iggmus
Gm12878	Brca1cIggmus
Gm12878	Brca1cIggmus
Gm12878	Cfos
Gm12878	Cfos
Gm12878	Chd21250Iggmus
Gm12878	Chd21250Iggmus
Gm12878	Ctcfc20
Gm12878	Ctcfc20
Gm12878	Ebf
Gm12878	Ebf
Gm12878	Gcn5
Gm12878	Gcn5
Gm12878	Irf3
Gm12878	Irf3
Gm12878	Jund
Gm12878	Jund
Gm12878	Max
Gm12878	Max
Gm12878	Nfe2h
Gm12878	Nfe2h
Gm12878	NfkbIggrab
Gm12878	NfkbIggrab
Gm12878	NfkbTnfa
Gm12878	NfkbTnfa
Gm12878	Nrf1Iggmus
Gm12878	Nrf1Iggmus
Gm12878	P300n15
Gm12878	P300n15
Gm12878	Pol2Iggmus
Gm12878	Pol2Iggmus
Gm12878	Pol2
Gm12878	Pol2
Gm12878	Pol3
Gm12878	Pol3
Gm12878	Rad21Iggrab
Gm12878	Rad21Iggrab
Gm12878	Rfx5n494Iggmus
Gm12878	Rfx5n494Iggmus
Gm12878	Smc3ab9263Iggmus
Gm12878	Smc3ab9263Iggmus
Gm12878	Spt20
Gm12878	Spt20
Gm12878	Stat1
Gm12878	Stat1
Gm12878	Stat3Iggmus
Gm12878	Stat3Iggmus
Gm12878	TbpIggmus
Gm12878	TbpIggmus
Gm12878	Tr4
Gm12878	Tr4
Gm12878	Usf2Iggmus
Gm12878	Usf2Iggmus
Gm12878	WhipIggmus
Gm12878	WhipIggmus
Gm12878	Yy1
Gm12878	Yy1
Gm12878	Znf143166181ap
Gm12878	Znf143166181ap
Gm12878	Zzz3
Gm12878	Zzz3
Gm12891	NfkbIggrab
Gm12891	NfkbIggrab
Gm12891	Pol2Iggmus
Gm12891	Pol2Iggmus
Gm12892	NfkbIggrab
Gm12892	NfkbIggrab
Gm12892	Pol2Iggmus
Gm12892	Pol2Iggmus
Gm15510	NfkbIggrab
Gm15510	NfkbIggrab
Gm15510	Pol2Iggmus
Gm15510	Pol2Iggmus
Gm18505	NfkbIggrab
Gm18505	NfkbIggrab
Gm18505	Pol2Iggmus
Gm18505	Pol2Iggmus
Gm18526	NfkbIggrab
Gm18526	NfkbIggrab
Gm18526	Pol2Iggmus
Gm18526	Pol2Iggmus
Gm18951	NfkbIggrab
Gm18951	NfkbIggrab
Gm18951	Pol2Iggmus
Gm18951	Pol2Iggmus
Gm19099	NfkbIggrab
Gm19099	NfkbIggrab
Gm19099	Pol2Iggmus
Gm19099	Pol2Iggmus
Gm19193	NfkbIggrab
Gm19193	NfkbIggrab
Gm19193	Pol2Iggmus
H1hesc	CjunIggrab
H1hesc	Ctbp2
H1hesc	Max
H1hesc	Nrf1Iggrab
H1hesc	Rad21Iggrab
H1hesc	Rfx5n494Iggrab
H1hesc	Suz12
H1hesc	Tbp
H1hesc	Usf2Iggrab
Hct116	Pol2
Hct116	Tcf4
Hek293	bElk4
Hek293	bKap1
Hek293	bPol2
Helas3	Ap2alpha
Helas3	Ap2gamma
Helas3	Baf155Iggmus
Helas3	Baf170Iggmus
Helas3	Bdp1
Helas3	Brca1cIggrab
Helas3	Brf1
Helas3	Brf2
Helas3	Brg1Iggmus
Helas3	CebpbIggrab
Helas3	Cfos
Helas3	CjunIggrab
Helas3	Cmyc
Helas3	E2f1
Helas3	E2f4
Helas3	E2f6
Helas3	Elk4
Helas3	Gcn5
Helas3	Gtf2f1rapIggrab
Helas3	Hae2f1
Helas3	Ini1Iggmus
Helas3	Irf3Iggrab
Helas3	JundIggrab
Helas3	Max
Helas3	Mxi1bhlhIggrab
Helas3	Nrf1Iggmus
Helas3	P300n15Iggrab
Helas3	Pol2
Helas3	Pol2s2Iggrab
Helas3	Prdm1vIggrab
Helas3	Rad21Iggrab
Helas3	Rfx5n494Iggrab
Helas3	Rpc155
Helas3	Smc3ab9263Iggrab
Helas3	Spt20
Helas3	Stat1Ifng30
Helas3	Stat3Iggrab
Helas3	TbpIggrab
Helas3	Tf3c110
Helas3	Tr4
Helas3	Usf2Iggmus
Helas3	Znf274
Helas3	Zzz3
Hepg2	CebpbForskln
Hepg2	CebpbIggrab
Hepg2	Chd21250Iggrab
Hepg2	CjunIggrab
Hepg2	ErraForskln
Hepg2	Grp20Forskln
Hepg2	Hnf4aForskln
Hepg2	Hsf1Forskln
Hepg2	Irf3Iggrab
Hepg2	JundIggrab
Hepg2	Maffm8194Iggrab
Hepg2	Mafkab50322Iggrab
Hepg2	Mafksc477Iggrab
Hepg2	Nrf1Iggrab
Hepg2	Pgc1aForskln
Hepg2	Pol2Forskln
Hepg2	Pol2Iggrab
Hepg2	Pol2Pravast
Hepg2	Rad21Iggrab
Hepg2	Rfx5n494Iggrab
Hepg2	Srebp1Insln
Hepg2	Srebp1Pravast
Hepg2	Srebp2Pravast
Hepg2	TbpIggrab
Hepg2	Tcf4
Hepg2	Usf2Iggrab
Hepg2b	Tr4
Hepg2b	Znf274
Huvec	Cfos
Huvec	Cjun
Huvec	Gata2
Huvec	Max
Huvec	Pol2
K562	Atf3
K562	Bdp1
K562	Brf1
K562	Brf2
K562	Brg1Iggmus
K562	Ccnt2
K562	CebpbIggrab
K562	Cfos
K562	Chd21250Iggrab
K562	CjunIfna6h
K562	CjunIfng30
K562	CjunIfng6h
K562	Cjun
K562	CmycIfna30
K562	CmycIfna6h
K562	CmycIfng30
K562	CmycIfng6h
K562	Cmyc
K562	Gtf2b
K562	Gtf2f1rapIggrab
K562	Hmgn3
K562	Ini1Iggmus
K562	Irf1Ifna30
K562	Irf1Ifng6h
K562	Jund
K562	Mafkab50322Iggrab
K562	Max
K562	Mxi1bhlhIggrab
K562	Nelfe
K562	Nfe2
K562	Nfya
K562	Nfyb
K562	Nrf1Iggrab
K562	P300f4Iggrab
K562	Pol2Ifna30
K562	Pol2Ifna6h
K562	Pol2Ifng30
K562	Pol2Ifng6h
K562	Pol2Iggmus
K562	Pol2
K562	Pol2s2
K562	Pol3
K562	Rad21
K562	Rpc155
K562	Sirt6
K562	Smc3ab9263Iggrab
K562	Stat1Ifna30
K562	Stat1Ifna6h
K562	Stat1Ifng30
K562	Stat1Ifng6h
K562	Stat2Ifna30
K562	Stat2Ifna6h
K562	Tal1sc12984Iggmus
K562	TbpIggmus
K562	Tf3c110
K562	Usf2
K562	Xrcc4
K562b	E2f4
K562b	E2f6
K562b	Gata1
K562b	Gata2
K562b	Kap1
K562b	Setdb1Mnased
K562b	Setdb1
K562b	Tr4
K562b	Yy1
K562b	Znf263
K562b	Znf274
Mcf10	aesPol2Etoh01
Mcf10	aesPol2Tam
Mcf10	aesStat3Etoh01
Mcf10	aesStat3Etoh01b
Mcf10	aesStat3Etoh01c
Mcf10	aesStat3Tam
Mcf7	Hae2f1
Nb4	Cmyc
Nb4	Max
Nb4	Pol2
Nt2d1	Suz12
Nt2d1	Yy1
Nt2d1	Znf274
Pbde	Gata1
Pbde	Pol2
Raji	Pol2
Shsy5y	Gata2
Trexhek293	Znf263
U2os	Kap1
U2os	Setdb1
K562	EfosControl
K562	Egata2Control
K562	Ehdac8Control
K562	EjunbControl
K562	EjundControl
K562	Enr4a1Control
Ag04449	Ctcf
Ag04450	Ctcf
Ag09309	Ctcf
Ag09319	Ctcf
Ag10803	Ctcf
Aoaf	Ctcf
Bj	Ctcf
Caco2	Ctcf
Gm06990	Ctcf
Gm12801	Ctcf
Gm12864	Ctcf
Gm12865	Ctcf
Gm12872	Ctcf
Gm12873	Ctcf
Gm12874	Ctcf
Gm12875	Ctcf
Gm12878	Ctcf
Hasp	Ctcf
Hbmec	Ctcf
Hcfaa	Ctcf
Hcpe	Ctcf
Hee	Ctcf
Hek293	Ctcf
Helas3	Ctcf
Hepg2	Ctcf
Hl60	Ctcf
Hmec	Ctcf
Hmf	Ctcf
Hpaf	Ctcf
Hpf	Ctcf
Hre	Ctcf
Hrpe	Ctcf
Huvec	Ctcf
K562	Ctcf
Nhek	Ctcf
Saec	Ctcf
Sknshra	Ctcf
Werirb1	Ctcf
ENCODE TF ChIP-seq (PeakSeq)
(for abbreviation details, see http://genome.ucsc.edu/ENCODE/downloads.html)
Cell Type	ChIPseq Feature
Gm12878	Ctcf
H1hesc	Ctcf
Helas3	Ctcf
Helas3	Pol2b
Hepg2	Ctcf
Hmec	Ctcf
Hsmm	Ctcf
Hsmmt	Ctcf
Huvec	Ctcf
Huvec	Pol2b
K562	Ctcf
K562	Pol2b
Nha	Ctcf
Nhdfad	Ctcf
Nhek	Ctcf
Nhek	Pol2b
Nhlf	Ctcf
Osteobl	Ctcf
A549	CtcfPcr1xDexa
A549	CtcfPcr1xEtoh02
A549	GrPcr1xDexb
A549	GrPcr1xDexc
A549	GrPcr1xDexd
A549	GrPcr2xDexa
A549	Pol2Pcr2xDexa
A549	Pol2Pcr2xEtoh02
A549	Usf1Pcr1xDexa
A549	Usf1Pcr1xEtoh02
Ecc1	EralphaaV0416102Estradia1h
Ecc1	EralphaaV0416102Gen1h
Ecc1	Foxa1c20V0416102Dmso2
Ecc1	GrV0416102Dexa
Ecc1	Pol2V0416102Dmso2
Gm12878	Atf3Pcr1x
Gm12878	BatfPcr1x
Gm12878	Bcl11aPcr1x
Gm12878	Bcl3Pcr1x
Gm12878	Bclaf1m33V0416101
Gm12878	Ebf1c8Pcr1x
Gm12878	EbfPcr1x
Gm12878	Egr1Pcr2x
Gm12878	Egr1V0416101
Gm12878	Elf1sc631V0416101
Gm12878	Ets1Pcr1x
Gm12878	GabpPcr2x
Gm12878	Irf4Pcr1x
Gm12878	Irf4m17Pcr1x
Gm12878	Mef2aPcr1x
Gm12878	Mef2csc13268Pcr1x
Gm12878	NrsfPcr2x
Gm12878	Oct2Pcr1x
Gm12878	P300Pcr1x
Gm12878	Pax5c20Pcr1x
Gm12878	Pax5n19Pcr1x
Gm12878	Pbx3Pcr1x
Gm12878	Pol24h8Pcr1x
Gm12878	Pol2Pcr2x
Gm12878	Pou2f2Pcr1x
Gm12878	Pu1Pcr1x
Gm12878	Rad21V0416101
Gm12878	RxraPcr1x
Gm12878	Sin3ak20Pcr2x
Gm12878	Six5Pcr1x
Gm12878	Sp1Pcr1x
Gm12878	SrfPcr2x
Gm12878	SrfV0416101
Gm12878	Taf1Pcr1x
Gm12878	Tcf12Pcr1x
Gm12878	Usf1Pcr2x
Gm12878	Yy1V0416101
Gm12878	Zbtb33Pcr1x
Gm12878	Zeb1sc25388V0416102
Gm12891	Oct2Pcr1x
Gm12891	Pax5c20Pcr1x
Gm12891	Pol24h8Pcr1x
Gm12891	Pol2Pcr1x
Gm12891	Pou2f2Pcr1x
Gm12891	Pu1Pcr1x
Gm12891	Taf1Pcr1x
Gm12891	Yy1c20V0416101
Gm12892	Pax5c20Pcr1x
Gm12892	Pol24h8Pcr1x
Gm12892	Pol24h8V0416102
Gm12892	Pol2Pcr1x
Gm12892	Pol2V0416102
Gm12892	Taf1Pcr1x
Gm12892	Taf1V0416102
Gm12892	Yy1V0416101
H1hesc	Atf3Pcr1x
H1hesc	Bcl11aPcr1x
H1hesc	Bcl3Pcr1x
H1hesc	Ctcfsc5916V0416102
H1hesc	Egr1V0416101
H1hesc	Egr1V0416102
H1hesc	GabpPcr1x
H1hesc	Hdac2sc6296V0416102
H1hesc	JundV0416102
H1hesc	Nanogsc33759V0416102
H1hesc	NrsfPcr1x
H1hesc	NrsfV0416102
H1hesc	P300V0416102
H1hesc	Pol24h8Pcr1x
H1hesc	Pol24h8V0416102
H1hesc	Pol2Pcr1x
H1hesc	Pol2V0416102
H1hesc	Pou5f1sc9081V0416102
H1hesc	Rad21V0416102
H1hesc	RxraV0416102
H1hesc	Sin3ak20Pcr1x
H1hesc	Six5Pcr1x
H1hesc	Sp1Pcr1x
H1hesc	SrfPcr1x
H1hesc	Taf1Pcr1x
H1hesc	Taf1V0416102
H1hesc	Taf7sq8V0416102
H1hesc	Tcf12Pcr1x
H1hesc	Usf1Pcr1x
H1hesc	Yy1c20Pcr1x
Hct116	Pol24h8V0416101
Helas3	GabpPcr1x
Helas3	NrsfPcr1x
Helas3	Pol2Pcr1x
Helas3	Taf1Pcr1x
Hepg2	Atf3V0416101
Hepg2	Bhlhe40V0416101
Hepg2	CtcfV0416101
Hepg2	Elf1sc631V0416101
Hepg2	Fosl2Pcr1x
Hepg2	Foxa1c20Pcr1x
Hepg2	Foxa1sc101058Pcr1x
Hepg2	Foxa2sc6554V0416101
Hepg2	GabpPcr2x
Hepg2	Hdac2sc6296V0416101
Hepg2	Hey1V0416101
Hepg2	Hnf4ah171Pcr1x
Hepg2	Hnf4gsc6558V0416101
Hepg2	JundPcr1x
Hepg2	NrsfPcr2x
Hepg2	P300Pcr1x
Hepg2	P300V0416101
Hepg2	Pol2Pcr2x
Hepg2	Rad21V0416101
Hepg2	RxraPcr1x
Hepg2	Sin3ak20Pcr1x
Hepg2	Sp1Pcr1x
Hepg2	SrfV0416101
Hepg2	Taf1Pcr2x
Hepg2	Tcf12Pcr1x
Hepg2	Usf1Pcr1x
Hepg2	Zbtb33Pcr1x
Hepg2	Zbtb33V0416101
Htb11	NrsfPcr2x
K562	Bcl3Pcr1x
K562	Bclaf1m33Pcr1x
K562	Ctcflsc98982V0416101
K562	E2f6h50V0416102
K562	Egr1V0416101
K562	Elf1sc631V0416102
K562	Ets1V0416101
K562	Fosl1sc183V0416101
K562	GabpV0416101
K562	Gata2cg2Pcr1x
K562	Hdac2sc6296V0416102
K562	Hey1Pcr1x
K562	MaxV0416102
K562	NrsfV0416102
K562	Pol24h8Pcr1x
K562	Pol24h8V0416101
K562	Pol2V0416101
K562	Pu1Pcr1x
K562	Rad21V0416102
K562	Sin3ak20V0416101
K562	Six5Pcr1x
K562	Sp1Pcr1x
K562	Sp2sc643V0416102
K562	SrfV0416101
K562	Taf1Pcr1x
K562	Taf1V0416101
K562	Taf7sq8V0416101
K562	Thap1sc98174V0416101
K562	Usf1V0416101
K562	Yy1V0416101
K562	Yy1V0416102
K562	Zbtb33Pcr1x
K562	Zbtb7asc34508V0416101
Panc1	NrsfPcr2x
Pfsk1	NrsfPcr2x
Sknshra	CtcfV0416102
Sknshra	P300V0416102
Sknshra	Rad21V0416102
Sknshra	Usf1sc8983V0416102
Sknshra	Yy1c20V0416102
T47d	Ctcfsc5916V0416102Dmso2
T47d	EralphaaPcr2xGen1h
T47d	EralphaaV0416102Estradia1h
T47d	Foxa1c20V0416102Dmso2
T47d	Gata3sc268V0416102Dmso2
T47d	P300V0416102Dmso2
U87	NrsfPcr2x
Fibrobl	Ctcf
Gliobla	Ctcf
Gliobla	Pol2
Gm12878	Cmyc
Gm12878	Ctcf
Gm12878	Pol2
Helas3	Cmyc
Helas3	Ctcf
Helas3	Pol2
Hepg2	Cmyc
Hepg2	Ctcf
Hepg2	Pol2
Huvec	Cmyc
Huvec	Ctcf
Huvec	Pol2
K562	Cmyc
K562	Ctcf
K562	Pol2
Mcf7	CmycEstro
Mcf7	CmycVeh
Mcf7	Ctcf
Mcf7	CtcfEstro
Mcf7	CtcfVeh
Mcf7	Pol2
Progfib	Ctcf
Progfib	Pol2
Gm10847	NfkbIggrab
Gm10847	Pol2Iggmus
Gm12878	Brca1cIggmus
Gm12878	Cfos
Gm12878	Chd21250Iggmus
Gm12878	Ctcfc20
Gm12878	Ebf
Gm12878	Gcn5
Gm12878	Irf3
Gm12878	Jund
Gm12878	Max
Gm12878	Nfe2h
Gm12878	NfkbIggrab
Gm12878	NfkbTnfa
Gm12878	Nrf1Iggmus
Gm12878	P300n15
Gm12878	Pol2Iggmus
Gm12878	Pol2
Gm12878	Pol3
Gm12878	Rad21Iggrab
Gm12878	Rfx5n494Iggmus
Gm12878	Smc3ab9263Iggmus
Gm12878	Spt20
Gm12878	Stat1
Gm12878	Stat3Iggmus
Gm12878	TbpIggmus
Gm12878	Tr4
Gm12878	Usf2Iggmus
Gm12878	WhipIggmus
Gm12878	Yy1
Gm12878	Znf143166181ap
Gm12878	Zzz3
Gm12891	NfkbIggrab
Gm12891	Pol2Iggmus
Gm12892	NfkbIggrab
Gm12892	Pol2Iggmus
Gm15510	NfkbIggrab
Gm15510	Pol2Iggmus
Gm18505	NfkbIggrab
Gm18505	Pol2Iggmus
Gm18526	NfkbIggrab
Gm18526	Pol2Iggmus
Gm18951	NfkbIggrab
Gm18951	Pol2Iggmus
Gm19099	NfkbIggrab
Gm19099	Pol2Iggmus
Gm19193	NfkbIggrab
Gm19193	Pol2Iggmus
H1hesc	CjunIggrab
H1hesc	Ctbp2
H1hesc	Max
H1hesc	Nrf1Iggrab
H1hesc	Rad21Iggrab
H1hesc	Rfx5n494Iggrab
H1hesc	Suz12
H1hesc	Tbp
H1hesc	Usf2Iggrab
Hct116	Pol2
Hct116	Tcf4
Hek293b	Elk4
Hek293b	Kap1
Hek293b	Pol2
Helas3	Ap2alpha
Helas3	Ap2gamma
Helas3	Baf155Iggmus
Helas3	Baf170Iggmus
Helas3	Bdp1
Helas3	Brca1cIggrab
Helas3	Brf1
Helas3	Brf2
Helas3	Brg1Iggmus
Helas3	CebpbIggrab
Helas3	Cfos
Helas3	CjunIggrab
Helas3	Cmyc
Helas3	E2f1
Helas3	E2f4
Helas3	E2f6
Helas3	Elk4
Helas3	Gcn5
Helas3	Gtf2f1rapIggrab
Helas3	Hae2f1
Helas3	Ini1Iggmus
Helas3	Irf3Iggrab
Helas3	JundIggrab
Helas3	Max
Helas3	Mxi1bhlhIggrab
Helas3	Nrf1Iggmus
Helas3	P300n15Iggrab
Helas3	Pol2
Helas3	Pol2s2Iggrab
Helas3	Prdm1vIggrab
Helas3	Rad21Iggrab
Helas3	Rfx5n494Iggrab
Helas3	Rpc155
Helas3	Smc3ab9263Iggrab
Helas3	Spt20
Helas3	Stat1Ifng30
Helas3	Stat3Iggrab
Helas3	TbpIggrab
Helas3	Tf3c110
Helas3	Tr4
Helas3	Usf2Iggmus
Helas3	Znf274
Helas3	Zzz3
Hepg2	CebpbForskln
Hepg2	CebpbIggrab
Hepg2	Chd21250Iggrab
Hepg2	CjunIggrab
Hepg2	ErraForskln
Hepg2	Grp20Forskln
Hepg2	Hnf4aForskln
Hepg2	Hsf1Forskln
Hepg2	Irf3Iggrab
Hepg2	JundIggrab
Hepg2	Maffm8194Iggrab
Hepg2	Mafkab50322Iggrab
Hepg2	Mafksc477Iggrab
Hepg2	Nrf1Iggrab
Hepg2	Pgc1aForskln
Hepg2	Pol2Forskln
Hepg2	Pol2Iggrab
Hepg2	Pol2Pravast
Hepg2	Rad21Iggrab
Hepg2	Rfx5n494Iggrab
Hepg2	Srebp1Insln
Hepg2	Srebp1Pravast
Hepg2	Srebp2Pravast
Hepg2	TbpIggrab
Hepg2	Tcf4
Hepg2	Usf2Iggrab
Hepg2	bTr4
Hepg2	bZnf274
Huvec	Cfos
Huvec	Cjun
Huvec	Gata2
Huvec	Max
Huvec	Pol2
K562	Atf3
K562	Bdp1
K562	Brf1
K562	Brf2
K562	Brg1Iggmus
K562	Ccnt2
K562	CebpbIggrab
K562	Cfos
K562	Chd21250Iggrab
K562	CjunIfna6h
K562	CjunIfng30
K562	CjunIfng6h
K562	Cjun
K562	CmycIfna30
K562	CmycIfna6h
K562	CmycIfng30
K562	CmycIfng6h
K562	Cmyc
K562	Gtf2b
K562	Gtf2f1rapIggrab
K562	Hmgn3
K562	Ini1Iggmus
K562	Irf1Ifna30
K562	Irf1Ifng6h
K562	Jund
K562	Mafkab50322Iggrab
K562	Max
K562	Mxi1bhlhIggrab
K562	Nelfe
K562	Nfe2
K562	Nfya
K562	Nfyb
K562	Nrf1Iggrab
K562	P300f4Iggrab
K562	Pol2Ifna30
K562	Pol2Ifna6h
K562	Pol2Ifng30
K562	Pol2Ifng6h
K562	Pol2Iggmus
K562	Pol2
K562	Pol2s2
K562	Pol3
K562	Rad21
K562	Rpc155
K562	Sirt6
K562	Smc3ab9263Iggrab
K562	Stat1Ifna30
K562	Stat1Ifna6h
K562	Stat1Ifng30
K562	Stat1Ifng6h
K562	Stat2Ifna30
K562	Stat2Ifna6h
K562	Tal1sc12984Iggmus
K562	TbpIggmus
K562	Tf3c110
K562	Usf2
K562	Xrcc4
K562b	E2f4
K562b	E2f6
K562b	Gata1
K562b	Gata2
K562b	Kap1
K562b	Setdb1Mnased
K562b	Setdb1
K562b	Tr4
K562b	Yy1
K562b	Znf263
K562b	Znf274
Mcf10aes	Pol2Etoh01
Mcf10aes	Pol2Tam
Mcf10aes	Stat3Etoh01
Mcf10aes	Stat3Etoh01b
Mcf10aes	Stat3Etoh01c
Mcf10aes	Stat3Tam
Mcf7	Hae2f1
Nb4	Cmyc
Nb4	Max
Nb4	Pol2
Nt2d1	Suz12
Nt2d1	Yy1
Nt2d1	Znf274
Pbde	Gata1
Pbde	Pol2
Raji	Pol2
Shsy5y	Gata2
Trexhek293	Znf263
U2os	Kap1
U2os	Setdb1
K562	EfosControl
K562	Egata2Control
K562	Ehdac8Control
K562	EjunbControl
K562	EjundControl
K562	Enr4a1Control
Ag04449	Ctcf
Ag04450	Ctcf
Ag09309	Ctcf
Ag09319	Ctcf
Ag10803	Ctcf
Aoaf	Ctcf
Bj	Ctcf
Caco2	Ctcf
Gm06990	Ctcf
Gm12801	Ctcf
Gm12864	Ctcf
Gm12865	Ctcf
Gm12872	Ctcf
Gm12873	Ctcf
Gm12874	Ctcf
Gm12875	Ctcf
Gm12878	Ctcf
Hasp	Ctcf
Hbmec	Ctcf
Hcfaa	Ctcf
Hcpe	Ctcf
Hee	Ctcf
Hek293	Ctcf
Helas3	Ctcf
Hepg2	Ctcf
Hl60	Ctcf
Hmec	Ctcf
Hmf	Ctcf
Hpaf	Ctcf
Hpf	Ctcf
Hre	Ctcf
Hrpe	Ctcf
Huvec	Ctcf
K562	Ctcf
Nhek	Ctcf
Saec	Ctcf
Sknshra	Ctcf
Werirb1	Ctcf
JASPAR Motifs (Reverse-searched against the hg19 genome)
(for abbreviation details, see http://jaspar.genereg.net/)
Motif Name
Ar
CTCF
ESR1
ESR2
EWSR1-FLI1
FOXI1
Foxd3
HMG-I/Y
IXR1
Myf
NFYA
NRG1
PHD1
PLAG1
PPARG::RXRA
Pax4
REST
RREB1
SP1
Tal1::Gata1
YAP6
YGR067C
Zfp423
Zfx
h
znf143
TRANSFAC Motifs (Reverse-searched against the hg19 genome)
(for abbreviation details, see http://www.gene-regulation.com/pub/databases.html)
Motif Name
ABZ1
AP-2
AP-4
AR
ARP-1
AbaA
Adf-1
Alfin1
BLIMP1
Borg2
CAC-binding
CACCC-binding
COUPTF
CTCF
Cha4
Cup9
E2A
ERR
Egr
FACB
FOX
FOXJ2
FOXP1
Fkh2
GAL4
GC
GCN4
GCNF
GR
HEN1
HIC1
HSF
HSF1
Hairy
KROX
LIM1
LUN-1
LXR
LXR,
Lmo2
MADS-B
MCM1+SFF
MTF-1
MYF
MZF1
Met32
Muscle
MyoD
NF-1
NF-Y
NRSE
NRSF
NeuroD
Nrg1
OCT1
OCT6
Olf-1
PHO4
PPAR
PPARalpha:RXRalpha
PPARgamma:RXRalpha
PR
PU.1
Pax-4
Pax-5
Pbx1
Pitx2
RAV1
REST
RFX1
RREB-1
RSC30
SMAD4
SP1
SP1:SP3
SP4
SREBP
SRF
STAT1
Sp1
Sp3
Staf
TBX15
TBX22
TEC1
TRF1
Tye7
UF1H3BETA
VDR
YY1
Yap6
ZNF219
c-Ets-1
c-Myb
myogenin
p53
Swiss Regulon Motifs (Reverse-searched against the hg19 genome)
(for abbreviation details, see http://swissregulon.unibas.ch/data/hg19/mat_TF_associations.hg)
Motif Name
ADNP_IRX_SIX_ZHX
AHR_ARNT_ARNT2
AIRE
ALX1
AR
ARID5B
ARNT_ARNT2_BHLHB2_MAX_MYC_USF1
ATF2
ATF4
ATF5_CREB3
ATF6
BACH2
BPTF
CDC5L
CDX1,2,4
CEBPA,B_DDIT3
CREB1
CRX
CUX2
DBP
DMAP1_NCOR1,2_SMARC
E2F1..5
EBF1
EGR1..3
EHF
ELF1,2,4
ELK1,4_GABPA,B1
EN1,2
EOMES
EP300
ESR1
ESRRA
ETS1,2
EVI1
EWSR1-FLI1
FEV
FOSL2
FOS_FOSB,L1_JUNB,D
FOXA2
FOXC1,C2
FOXD1,D2
FOXD3
FOXF1,F2,J1
FOXI1,J2
FOXL1
FOXN1
FOXO1,3,4
FOXP3
FOXQ1
GATA1..3
GATA6
GFI1
GFI1B
GLI1..3
GTF2A1,2
GTF2I
GZF1
HAND1,2
HBP1_HMGB_SSRP1_UBTF
HES1
HIC1
HIF1A
HLF
HMGA1,2
HMX1
HNF1A
HNF4A_NR2F1,2
HOXA4,D4
HOXA5,B5
HOXA6,A7,B6,B7
HOXA9_MEIS1
HSF1,2
IKZF1
IKZF2
IRF1,2,7
JUN
KLF12
KLF4
LEF1_TCF7_TCF7L1,2
LHX3,4
LMO2
MAFB
MAZ
MEF2A,B,C,D
MSX1,2
MTF1
MYB
MYBL2
MYFfamily
MYOD1
MZF1
NANOG
NANOGmouse
NFATC1..3
NFE2
NFE2L1
NFE2L2
NFIL3
NFIX
NFKB1_REL_RELA
NFYA,B,C
NHLH1,2
NKX2-1,4
NKX2-2,8
NKX2-3_NKX2-5
NKX3-1
NKX3-2
NKX6-1,2
NR1H4
NR3C1
NR4A2
NR5A1,2
NR6A1
NRF1
ONECUT1,2
PATZ1
PAX2
PAX3,7
PAX4
PAX5
PAX6
PAX8
PBX1
PDX1
PITX1..3
POU1F1
POU2F1..3
POU3F1..4
POU5F1
POU5F1_SOX2dimer
POU6F1
PPARG
PRDM1
PRRX1,2
RBPJ
REST
RFX1..5_RFXANK_RFXAP
RORA
RREB1
RUNX1..3
RXRA,B,G
RXRA_VDRdimer
RXRG_dimer
SMAD1..7,9
SNAI1..3
SOX17
SOX2
SOX5
SOX8,9,10
SP1
SPI1
SPIB
SPZ1
SREBF1,2
SRF
SRY
STAT1,3
STAT2,4,6
STAT5A,B
T
TAL1_TCF3,4,12
TBP
TBX4,5
TCF4_dimer
TEAD1
TFAP2A,C
TFAP2B
TFAP4
TFCP2
TFDP1
TFEB
TGIF1
TLX1..3_NFICdimer
TLX2
TP53
VSX1,2
XBP1
YY1
ZBTB16
ZBTB6
ZEB1
ZFP161
ZIC1..3
ZNF143
ZNF148
ZNF238
ZNF384
ZNF423
bHLH_family
HOCOMOCO Motifs (Reverse-searched against the hg19 genome)
(for abbreviation details, see http://autosome.ru/HOCOMOCO/index.php)
Motif Name
AHR_si
AIRE_f2
ALX1_si
ANDR_do
AP2A_f2
AP2B_f1
AP2C_f1
AP2D_f1
ARI3A_do
ARI3A_f1
ARI5B_f1
ARNT2_si
ARNT_f1
ATF1_si
ATF2+ATF4_f1
ATF3_f1
ATF5_si
ATF6A_si
BACH1_si
BARX2_si
BATF_si
BCL6_f1
BHE40_f2
BHE41_f1
BMAL1_f1
BPTF_si
BRAC_si
BRCA1_f1
CDC5L_si
CDX1_f1
CDX2_f1
CEBPA_do
CEBPB_f1
CEBPD_f1
CEBPE_f1
CEBPG_si
CEBPZ_si
COE1_f2
COT1_f1
COT1_si
COT2_f1
COT2_f2
CREB1_f1
CREM_f1
CRX_si
CTCF_f2
CUX1_f1
CXXC1_si
DBP_si
DDIT3_f1
DLX2_f1
DLX3_do
E2F1_f2
E2F2_f1
E2F3_si
E2F4_do
E2F5_do
E2F6_f1
E2F7_f1
E4F1_f1
EGR1_f2
EGR2_si
EGR3_f1
EGR4_f1
EHF_si
ELF1_f1
ELF2_f1
ELF3_f1
ELF5_f1
ELK1_f1
ELK3_f1
ELK4_f1
ENOA_si
EOMES_f1
EPAS1_si
ERG_f1
ERR1_f1
ERR2_f1
ERR3_f1
ESR1_do
ESR2_do
ESR2_si
ETS1_si
ETS2_f1
ETV4_f1
ETV5_f1
ETV7_si
EVI1_f1
FEV_f1
FLI1_f1
FOSB_f1
FOSL1_f2
FOSL2_f1
FOS_si
FOXA1_f1
FOXA2_f1
FOXA3_f1
FOXC1_f1
FOXC2_f1
FOXD1_si
FOXD3_f1
FOXF1_f1
FOXF2_f1
FOXI1_f1
FOXJ2_f1
FOXJ3_f2
FOXJ3_si
FOXM1_f1
FOXO1_si
FOXO3_si
FOXO4_f1
FOXP2_si
FOXP3_f1
FOXQ1_f1
FUBP1_f1
GABP1+GABP2_f1
GABPA_f1
GATA1_si
GATA2_si
GATA3_si
GATA4_f1
GATA5_f1
GATA6_f2
GCM1_f1
GCR_do
GCR_si
GFI1B_f1
GFI1_f1
GLI1_f1
GLI2_f1
GLI3_si
GLIS3_f1
HAND1_si
HBP1_f1
HEN1_si
HES1_f1
HESX1_f1
HEY2_f1
HIC1_si
HIF1A_si
HINFP_f1
HLF_si
HLTF_f1
HMGA1_f1
HMGA2_f1
HNF1A_f1
HNF1B_f1
HNF4A_f1
HNF4G_f1
HNF6_f1
HSF1_f2
HSF2_si
HTF4_f1
HXA10_f1
HXA13_f1
HXA1_f1
HXA5_si
HXA7_f1
HXA9_f1
HXB1_f1
HXB6_f1
HXB7_si
HXB8_do
HXC6_f1
HXC8_f1
HXD10_f1
HXD13_f1
HXD4_f1
HXD9_f1
IKZF1_f1
INSM1_f1
IRF1_si
IRF2_f1
IRF3_f1
IRF4_si
IRF5_f1
IRF7_f1
IRF8_si
IRF9_f1
ISL1_f1
ITF2_f1
JUNB_f1
JUND_f1
JUN_f1
KAISO_f1
KLF15_f1
KLF1_f1
KLF3_f1
KLF4_f2
KLF6_si
KLF8_f1
LEF1_f1
LHX2_f1
LHX3_f1
MAFA_f1
MAFB_f1
MAFG_si
MAFK_si
MAF_f1
MAX_f1
MAZ_f1
MBD2_si
MCR_f1
MECP2_f1
MEF2A_f1
MEF2C_f1
MEF2D_f1
MEIS1_f2
MEIS2_do
MITF_f1
[truncated: 480 more rows]
