# Supplementary material for: Enhancer-targeted genome editing selectively blocks innate resistance to oncokinase inhibition
Source: HighWire-hosted journal article supplement (doi:10.1101/gr.166231.113), 2014-01-17
Supplement: Supplemental_Table4.xlsx [file Supplemental_Table4.xlsx]

## Sheet: allMITFpeaks.txt
Supplementary Table 4
Genomic coordinates for MITF ChIP-seq peaks
Coordinates in hg19 genome build of all called peaks for MITF present in both primary melanocytes and COLO829 melanoma cells
Chromosome	Start	Stop
chr1	918797	919826
chr1	935537	936845
chr1	1014685	1015806
chr1	1309936	1310884
chr1	1357788	1358607
chr1	1440137	1440686
chr1	1446721	1447599
chr1	1502481	1503065
chr1	1550512	1551281
chr1	1590219	1590902
chr1	1617436	1618052
chr1	1672319	1673184
chr1	1790442	1791434
chr1	1822587	1823637
chr1	2019232	2019702
chr1	2065613	2067359
chr1	2136650	2137272
chr1	2222010	2222578
chr1	2344177	2344852
chr1	2486100	2488792
chr1	2516766	2518506
chr1	2573570	2574625
chr1	3102936	3103700
chr1	3229484	3229995
chr1	3420179	3421410
chr1	3540769	3541926
chr1	3712822	3713760
chr1	3816427	3818221
chr1	4143279	4144241
chr1	5299860	5300428
chr1	5839552	5840164
chr1	5975574	5976223
chr1	6052385	6053159
chr1	6076095	6077259
chr1	6086056	6086902
chr1	6187378	6188396
chr1	6259217	6260044
chr1	6336294	6337022
chr1	6401991	6402790
chr1	6419533	6420128
chr1	6445706	6446524
chr1	6453577	6454774
chr1	6474324	6475140
chr1	6660923	6661825
chr1	6662748	6664527
chr1	6673265	6674216
chr1	6761248	6762240
chr1	6844194	6845524
chr1	6941258	6941928
chr1	7538938	7539456
chr1	7843393	7844432
chr1	8013844	8014703
chr1	8021186	8022002
chr1	8064269	8065701
chr1	8197755	8198714
chr1	8214380	8215175
chr1	8472143	8472580
chr1	8895797	8897091
chr1	8937994	8939626
chr1	8949631	8950364
chr1	8963979	8964720
chr1	9180110	9181175
chr1	9189352	9190065
chr1	9326809	9327803
chr1	9375312	9376351
chr1	9383986	9385335
chr1	9435035	9435669
chr1	9501287	9502281
chr1	9508674	9509966
chr1	9536699	9537488
chr1	9599107	9599761
chr1	9686652	9687536
chr1	9776956	9778312
chr1	9796781	9797770
chr1	9825654	9826493
chr1	9960470	9960949
chr1	9989399	9989802
chr1	10002784	10004108
chr1	10060929	10061471
chr1	10092520	10093843
chr1	10105857	10106501
chr1	10134125	10134843
chr1	10269846	10270663
chr1	10458546	10459154
chr1	10532130	10532930
chr1	11039068	11040741
chr1	11122678	11123702
chr1	11159975	11160339
chr1	11234316	11234812
chr1	11322186	11323006
chr1	11707679	11709265
chr1	11779616	11780240
chr1	11791740	11792282
chr1	11795741	11796696
chr1	11865376	11866585
chr1	11902038	11902584
chr1	11943167	11943850
chr1	12000343	12001195
chr1	12040018	12041181
chr1	12079075	12080041
chr1	12203329	12204454
chr1	12248023	12248619
chr1	12537836	12538770
chr1	12569937	12571013
chr1	12616140	12616952
chr1	12654960	12655810
chr1	12654960	12655810
chr1	12655940	12656392
chr1	13875918	13876279
chr1	13969060	13969779
chr1	14335970	14336339
chr1	14343715	14344606
chr1	14393482	14393874
chr1	15071482	15072256
chr1	15236208	15237057
chr1	15294374	15295782
chr1	15296286	15297464
chr1	15438278	15439395
chr1	15478417	15479611
chr1	15506118	15507519
chr1	15586590	15587817
chr1	15749581	15750206
chr1	15852747	15853928
chr1	15929685	15930370
chr1	16029872	16030541
chr1	16040955	16041524
chr1	16160792	16162987
chr1	16291796	16292267
chr1	16678696	16679577
chr1	16766660	16767648
chr1	16825841	16826582
chr1	16938689	16940621
chr1	16947093	16948237
chr1	16970763	16971832
chr1	17027518	17028329
chr1	17122838	17123322
chr1	17215637	17216315
chr1	17247567	17248651
chr1	17342601	17343237
chr1	17379777	17381055
chr1	17415598	17416935
chr1	17545393	17546071
chr1	17560007	17560645
chr1	17828810	17829554
chr1	17857932	17859104
chr1	17878126	17879185
chr1	17895921	17896666
chr1	17995277	17995925
chr1	19252842	19253540
chr1	19393107	19394323
chr1	19577654	19578847
chr1	19638632	19639198
chr1	19811841	19812710
chr1	19835418	19836122
chr1	19923622	19924283
chr1	19959599	19959993
chr1	19978695	19979105
chr1	20142477	20143396
chr1	20208605	20209157
chr1	20753287	20753805
chr1	21022912	21023790
chr1	21059175	21060223
chr1	21167268	21167608
chr1	21537532	21539001
chr1	21586884	21587598
chr1	21660625	21661043
chr1	21671816	21672908
chr1	21953255	21953744
chr1	21977722	21978300
chr1	22023420	22024005
chr1	22050597	22051070
chr1	22066600	22067244
chr1	22109348	22110663
chr1	22118172	22118883
chr1	22345364	22346128
chr1	22448641	22449519
chr1	22742878	22743637
chr1	22777812	22778868
chr1	22826989	22827431
chr1	22883885	22884751
chr1	23345323	23346441
chr1	23514912	23515970
chr1	23670524	23671597
chr1	23810837	23811411
chr1	23857443	23858237
chr1	23885664	23887060
chr1	24069498	24070531
chr1	24069498	24070531
chr1	24111149	24111868
chr1	24117333	24117773
chr1	24125767	24126381
chr1	24135957	24136670
chr1	24151340	24152209
chr1	24194945	24195872
chr1	24452623	24453197
chr1	24616090	24617013
chr1	24648574	24649370
chr1	24762160	24762859
chr1	24945849	24946286
chr1	24968974	24969874
chr1	24999801	25000438
chr1	25009912	25010675
chr1	25041250	25042598
chr1	25127681	25128113
chr1	25176135	25176731
chr1	25265844	25266735
chr1	25285797	25286313
chr1	25348485	25349880
chr1	25428092	25428835
chr1	25493677	25494726
chr1	25501443	25501976
chr1	25559066	25560186
chr1	25573932	25574576
chr1	25889987	25891259
chr1	26009666	26010408
chr1	26021335	26022050
chr1	26069598	26070806
chr1	26091614	26092210
chr1	26132266	26132954
chr1	26145314	26146420
chr1	26226491	26227168
chr1	26232362	26233241
chr1	26324293	26325245
chr1	26354626	26355892
chr1	26376003	26377014
chr1	26393748	26394810
chr1	26421162	26421915
chr1	26604718	26605568
chr1	26632572	26633539
chr1	26735015	26735508
chr1	26758237	26759237
chr1	26799253	26799909
chr1	26826600	26827959
chr1	26946475	26947936
chr1	27018657	27020130
chr1	27021721	27022651
chr1	27049458	27050509
chr1	27175631	27176374
chr1	27226332	27227132
chr1	27247822	27248857
chr1	27293487	27294003
chr1	27328000	27329384
chr1	27339042	27340019
chr1	27372347	27373033
chr1	27457013	27457735
chr1	27463887	27464845
chr1	27560841	27562118
chr1	27648316	27649299
chr1	27691854	27692953
chr1	27728818	27729471
chr1	27744853	27745254
chr1	27816347	27817607
chr1	27882388	27883102
chr1	27887583	27888284
chr1	27976724	27977656
chr1	28008398	28009029
chr1	28051542	28052726
chr1	28195530	28196251
chr1	28201528	28202193
chr1	28448673	28449232
chr1	28523521	28524057
chr1	28558951	28560054
chr1	28585570	28586594
chr1	28623293	28623772
chr1	28764307	28765050
chr1	28832116	28833529
chr1	28878842	28879557
chr1	28907962	28908879
chr1	28916451	28917344
chr1	28969154	28969922
chr1	29062919	29063708
chr1	29211229	29212100
chr1	29240516	29241337
chr1	29508048	29508943
chr1	29557193	29557706
chr1	29586074	29586653
chr1	30852471	30853552
chr1	31191338	31192258
chr1	31259241	31259971
chr1	31270829	31272239
chr1	31279417	31281374
chr1	31289080	31289908
chr1	31296630	31297425
chr1	31319986	31320803
chr1	31449803	31450542
chr1	31538166	31538864
chr1	31867429	31867972
chr1	32166095	32167777
chr1	32253804	32254390
chr1	32281378	32281908
chr1	32403817	32404585
chr1	32478748	32479714
chr1	32644769	32645800
chr1	32712156	32713212
chr1	32816322	32817781
chr1	32859686	32860649
chr1	33077861	33078263
chr1	33116278	33117325
chr1	33218767	33219874
chr1	33282400	33283627
chr1	33352050	33352573
chr1	33405037	33405732
chr1	33430196	33430802
chr1	33438326	33439050
chr1	33470640	33472092
chr1	33476778	33477221
chr1	33501247	33502301
chr1	33526176	33527153
chr1	33564746	33565896
chr1	33592602	33593553
chr1	33626414	33627336
chr1	33726748	33727587
chr1	33766586	33767590
chr1	33807665	33808472
chr1	33936104	33936595
chr1	35205097	35205874
chr1	35318212	35318756
chr1	35324946	35325927
chr1	35331541	35332521
chr1	35496832	35497919
chr1	35496832	35497919
chr1	35733950	35734850
chr1	36010353	36010938
chr1	36023015	36023736
chr1	36068943	36069845
chr1	36116021	36116738
chr1	36183839	36185029
chr1	36191022	36191716
chr1	36272984	36273592
chr1	36396019	36397268
chr1	36553841	36555419
chr1	36598903	36600058
chr1	36614633	36615672
chr1	36622006	36623042
chr1	36689251	36690734
chr1	36765335	36765956
chr1	36766813	36767551
chr1	36839190	36840253
chr1	36851533	36852490
chr1	36862892	36864040
chr1	36866113	36867225
chr1	36916148	36916887
chr1	36929351	36930575
chr1	37119250	37120113
chr1	37169243	37169744
chr1	37457003	37457538
chr1	37537340	37537812
chr1	37588873	37590028
chr1	37596707	37597689
chr1	38019648	38020319
chr1	38155619	38156796
chr1	38273635	38274505
chr1	38412399	38412973
chr1	38455104	38456061
chr1	38477658	38478805
chr1	38495784	38497608
chr1	38683483	38683908
chr1	39030923	39031265
chr1	39249335	39249885
chr1	39324960	39326220
chr1	39456223	39457023
chr1	39598081	39598642
chr1	39670412	39671134
chr1	39796418	39796890
chr1	39864003	39864730
chr1	40006156	40006948
chr1	40119176	40119813
chr1	40250977	40251879
chr1	40264446	40265301
chr1	40486531	40487011
chr1	40505202	40506965
chr1	40562419	40563180
chr1	40626696	40627534
chr1	40723357	40724302
chr1	40780621	40781574
chr1	40857954	40858417
chr1	40915306	40916397
chr1	41156878	41158354
chr1	41343258	41343986
chr1	41367538	41367968
chr1	41385165	41385892
chr1	41469279	41469966
chr1	41706674	41707537
chr1	41809284	41809893
chr1	41898012	41899327
chr1	41980001	41981430
chr1	42083571	42084343
chr1	42155338	42156119
chr1	42178334	42179247
chr1	42421084	42421683
chr1	42479284	42480427
chr1	42501604	42502062
chr1	42800837	42801384
chr1	42886471	42886924
chr1	42921387	42922491
chr1	43123608	43124636
chr1	43147444	43148290
chr1	43282487	43283185
chr1	43522826	43523196
chr1	43603146	43603771
chr1	43613327	43613955
chr1	43833452	43834645
chr1	43855197	43855823
chr1	43919164	43920154
chr1	44132367	44132895
chr1	44172755	44173220
chr1	44252681	44253052
chr1	44300240	44301340
chr1	44411924	44413224
chr1	44440098	44441207
chr1	44456616	44457604
chr1	44476400	44477549
chr1	44793291	44793987
chr1	45097271	45098077
chr1	45125636	45126475
chr1	45139530	45140639
chr1	45240573	45241690
chr1	45265303	45266183
chr1	45272651	45274254
chr1	45451844	45452639
chr1	45466545	45466874
chr1	45477570	45478143
chr1	45768779	45770159
chr1	45799866	45800462
chr1	45805603	45806519
chr1	45830422	45831298
chr1	45846864	45847778
chr1	45966195	45967164
chr1	46016029	46017170
chr1	46049254	46050772
chr1	46151756	46152657
chr1	46337786	46338352
chr1	46502223	46502914
chr1	46598092	46599057
chr1	46621842	46622711
chr1	46654087	46654701
chr1	46687447	46688205
chr1	46768620	46769618
chr1	46805836	46807120
chr1	46988040	46988930
chr1	47082093	47083135
chr1	48034349	48035006
chr1	48043315	48045066
chr1	48093352	48094096
chr1	48416665	48417293
chr1	48580229	48580560
chr1	48707674	48708392
chr1	48959692	48960675
chr1	49153009	49153503
chr1	49564308	49564881
chr1	50569415	50569887
chr1	50798900	50799721
chr1	50814128	50814808
chr1	51425599	51426509
chr1	51701481	51702078
chr1	51990466	51990922
chr1	52000529	52001100
chr1	52049121	52049964
chr1	52058222	52058853
chr1	52082508	52083371
chr1	52250519	52251521
chr1	52344080	52344980
chr1	52498208	52499578
chr1	52521769	52522585
chr1	52733992	52734711
chr1	52830691	52832258
chr1	52869763	52870388
chr1	53018093	53019660
chr1	53163354	53164398
chr1	53392699	53393561
chr1	53539149	53539812
chr1	53703932	53704538
chr1	53746933	53747338
chr1	53791356	53792511
chr1	53791356	53792511
chr1	54303597	54304394
chr1	54362032	54362998
chr1	54410906	54412291
chr1	54447786	54448765
chr1	54518261	54519481
chr1	54664907	54665748
chr1	54695035	54695571
chr1	54738785	54739542
chr1	54752447	54753716
chr1	54752447	54753716
chr1	54878712	54879485
chr1	55043202	55044082
chr1	55229981	55230532
chr1	55352647	55353460
chr1	55415946	55416975
chr1	55461964	55462482
chr1	55679647	55681249
chr1	55740651	55741264
chr1	55909274	55909669
chr1	56282129	56282526
chr1	56529132	56529574
chr1	56828966	56829402
chr1	57044628	57045492
chr1	58756141	58757044
chr1	58898354	58898832
chr1	59011454	59012632
chr1	59192912	59193599
chr1	59220688	59221549
chr1	59248681	59250556
chr1	59281774	59282372
chr1	59340536	59340949
chr1	59369371	59370160
chr1	59390470	59390827
chr1	59761797	59763011
chr1	60135408	60136013
chr1	60209218	60209814
chr1	60218098	60219162
chr1	60235094	60235913
chr1	60745855	60746373
chr1	61369280	61370912
chr1	61369280	61370912
chr1	61515317	61516282
chr1	61522673	61523167
chr1	61542476	61543158
chr1	61649468	61650346
chr1	61752766	61753695
chr1	61803358	61804230
chr1	61869563	61870169
chr1	62190458	62191259
chr1	62765152	62766202
chr1	62901678	62903292
chr1	63249388	63250068
chr1	63710887	63711263
chr1	63727357	63727930
chr1	63787694	63788746
chr1	63832858	63833780
chr1	63880338	63881155
chr1	63988297	63989594
chr1	64059098	64059929
chr1	64163776	64164386
chr1	64469984	64470889
chr1	64505036	64505610
chr1	64542866	64543735
chr1	64598484	64599269
chr1	64696791	64697205
chr1	64808858	64810256
chr1	64947861	64948301
chr1	65210152	65210804
chr1	65468271	65469239
chr1	65533219	65534124
chr1	65614673	65615219
chr1	65713510	65714028
chr1	65885304	65886450
chr1	66444881	66445391
chr1	66737553	66738029
chr1	66758575	66759112
chr1	67042389	67042777
chr1	67170696	67171117
chr1	67390330	67391873
chr1	67410299	67410816
chr1	67722802	67723450
chr1	67779327	67780012
chr1	67869839	67870262
chr1	67896154	67896951
chr1	68151974	68152760
chr1	68215303	68216264
chr1	68297433	68298115
chr1	68312931	68313896
chr1	68573280	68573866
chr1	68697820	68698489
chr1	68962310	68963028
chr1	70136942	70137758
chr1	70162131	70162601
chr1	70503707	70504212
chr1	70671083	70671693
chr1	70686935	70687889
chr1	74663615	74664161
chr1	75430188	75430585
chr1	76435308	76435664
chr1	76539156	76539693
chr1	77152899	77153805
chr1	77865358	77865741
chr1	78070689	78071726
chr1	78148114	78149610
chr1	78224941	78225669
chr1	78262369	78262751
chr1	78444191	78445311
chr1	79083227	79083693
chr1	79142842	79143541
chr1	82300550	82300968
chr1	83471848	83472305
chr1	84325816	84326921
chr1	84464676	84465495
chr1	84809812	84810723
chr1	84873497	84874154
chr1	84944631	84945529
chr1	84971199	84972898
chr1	85069055	85070089
chr1	85224585	85225324
chr1	85462250	85463161
chr1	85513929	85514812
chr1	85666669	85667750
chr1	85724789	85725691
chr1	85741893	85742690
chr1	86046702	86047828
chr1	86077494	86078079
chr1	86173671	86174339
chr1	86743468	86744463
chr1	86784167	86784583
chr1	86805382	86805990
chr1	86861039	86861764
chr1	86952615	86953382
chr1	87169912	87170731
chr1	87380413	87381506
chr1	87597487	87597922
chr1	87620714	87621851
chr1	87691674	87692476
chr1	88781174	88781504
chr1	89149378	89150448
chr1	89356979	89357728
chr1	89457786	89459058
chr1	89989664	89990100
chr1	90070990	90072012
chr1	90098911	90099619
chr1	90286201	90286784
chr1	90308760	90309601
chr1	90404628	90405154
chr1	90460276	90460952
chr1	90868465	90869061
chr1	90885563	90885992
chr1	91229437	91229937
chr1	91316041	91317305
chr1	91487388	91487845
chr1	91638884	91639768
chr1	91852622	91853310
chr1	91869569	91870478
chr1	92030314	92031510
chr1	92047994	92048513
chr1	92088131	92088857
chr1	92350799	92352068
chr1	92764166	92764836
chr1	93250409	93251542
chr1	93297012	93297967
chr1	93425847	93426824
chr1	93645244	93646576
chr1	93810963	93811692
chr1	93907828	93908237
chr1	94018275	94019137
chr1	94120445	94121014
chr1	94134900	94135288
chr1	94511109	94511703
chr1	94731155	94731868
chr1	94736373	94736891
chr1	95170962	95171956
chr1	95270073	95270683
chr1	95319643	95320415
chr1	95693206	95693619
chr1	95774125	95774736
chr1	95850075	95850548
chr1	95872891	95873892
chr1	96126300	96126728
chr1	96185462	96186180
chr1	97187166	97188430
chr1	97471550	97472176
chr1	97610771	97611474
chr1	97969968	97970619
chr1	98386030	98387050
chr1	98513840	98514216
chr1	99955632	99955966
chr1	99968811	99969178
chr1	100150964	100151604
chr1	100315326	100316322
chr1	100503047	100504162
chr1	100598119	100598883
chr1	100654115	100654762
chr1	100816604	100817253
chr1	101491113	101492094
chr1	101757278	101757613
chr1	101974883	101975335
chr1	104679112	104679820
chr1	104930775	104931336
chr1	105487936	105488412
chr1	107599184	107599890
chr1	107682460	107683031
chr1	108072963	108073557
chr1	108231916	108232240
chr1	108232931	108233664
chr1	108240516	108241153
chr1	108281873	108282760
chr1	108543169	108543850
chr1	108600146	108600535
chr1	108742502	108743211
chr1	109098887	109099718
chr1	109235113	109235934
chr1	109358968	109359426
chr1	109359572	109360369
chr1	109618468	109619317
chr1	109626517	109627038
chr1	109642599	109643613
chr1	109795855	109797056
chr1	109805806	109806754
chr1	109817129	109817841
chr1	109825496	109826408
chr1	109841421	109842996
chr1	109968455	109969862
chr1	110008771	110009424
chr1	110052318	110052916
chr1	110090867	110091601
chr1	110162141	110163035
chr1	110198307	110199197
chr1	110316046	110316935
chr1	110444152	110444722
chr1	110452893	110453501
chr1	110522199	110522615
chr1	110526795	110527859
chr1	110572118	110572553
chr1	110648615	110649183
chr1	110679531	110680218
chr1	110720059	110720814
chr1	110730699	110731469
chr1	110880986	110882968
chr1	110949734	110950720
chr1	110954901	110955694
chr1	111098863	111099692
chr1	111108039	111108848
chr1	111124145	111125030
chr1	111742346	111743374
chr1	111770849	111771515
chr1	111796575	111796939
chr1	111810187	111810769
chr1	111817659	111818138
chr1	111888972	111889590
chr1	111991249	111992354
chr1	112050355	112051354
chr1	112056152	112056688
chr1	112281692	112282477
chr1	112297588	112298806
chr1	113007603	113009260
chr1	113007603	113009260
chr1	113132332	113132964
chr1	113216647	113217610
chr1	113346727	113347318
chr1	113361319	113362320
chr1	113383291	113383636
chr1	113497898	113499480
chr1	113615181	113616383
chr1	113932462	113933411
chr1	113932462	113933411
chr1	114354690	114355766
chr1	114446978	114448258
chr1	114656428	114656875
chr1	115000770	115001381
chr1	115124175	115124648
chr1	115259242	115259896
chr1	115300137	115300980
chr1	115322873	115323416
chr1	116088313	116089154
chr1	116199209	116200158
chr1	116270401	116270935
chr1	116545756	116546260
chr1	116615877	116616442
chr1	116958204	116959199
chr1	116975711	116977014
chr1	117019799	117020737
chr1	117031771	117032326
chr1	117040066	117041573
chr1	117221572	117223034
chr1	117252956	117253485
chr1	117514115	117514829
chr1	117714318	117715164
chr1	118107032	118107572
chr1	118199531	118200120
chr1	118345010	118345863
chr1	119161550	119162113
chr1	119682726	119683426
chr1	119788523	119788868
chr1	119866333	119866694
chr1	120138063	120138722
chr1	120173740	120174831
chr1	120190543	120191374
chr1	120274419	120275897
chr1	121483948	121485595
chr1	144009690	144010767
chr1	144535767	144536729
chr1	144866218	144867536
chr1	144931292	144932836
chr1	145014599	145015769
chr1	145014599	145015769
chr1	145038751	145040722
chr1	145044609	145046020
chr1	145092070	145092996
chr1	145114419	145114751
chr1	145208752	145210732
chr1	145382189	145383312
chr1	145395202	145398065
chr1	145437784	145438920
chr1	145454971	145456321
chr1	145476613	145477739
chr1	145514958	145516895
chr1	145542198	145543450
chr1	145588379	145589641
chr1	145610545	145611627
chr1	145676147	145676428
chr1	145717999	145718539
chr1	146643173	146644812
chr1	146713793	146715070
chr1	147012680	147013359
chr1	147070991	147072247
chr1	147186784	147187723
chr1	147287469	147288407
chr1	148176226	148176811
chr1	148555927	148557065
chr1	149856848	149858403
chr1	149870702	149872117
chr1	149870702	149872117
chr1	149982297	149983053
chr1	149987229	149988127
chr1	150038820	150040121
chr1	150054681	150055348
chr1	150135164	150136265
chr1	150185546	150186310
chr1	150207904	150208631
chr1	150228656	150230119
chr1	150231249	150232269
chr1	150240059	150241873
chr1	150253669	150255338
chr1	150293643	150294495
chr1	150335800	150337538
chr1	150383181	150383739
chr1	150459215	150460078
chr1	150479907	150480954
chr1	150487730	150488680
chr1	150521079	150521774
chr1	150533029	150535235
chr1	150551572	150552834
chr1	150761835	150762555
chr1	150782205	150782557
chr1	150848191	150849588
chr1	150978666	150979862
chr1	151019856	151020964
chr1	151042713	151043908
chr1	151170642	151171284
chr1	151226929	151227694
chr1	151253409	151254589
chr1	151302401	151302791
chr1	151319006	151319963
chr1	151378129	151379455
chr1	151448536	151448951
chr1	151483471	151484609
chr1	151512127	151513404
chr1	151584262	151585398
chr1	151593872	151594487
chr1	151763297	151764085
chr1	151811465	151813399
chr1	151881635	151882855
chr1	151913573	151914132
chr1	152009041	152010293
chr1	152020102	152021639
chr1	152160794	152162129
chr1	152670513	152670982
chr1	153005276	153005744
chr1	153507557	153509098
chr1	153517509	153518195
chr1	153537973	153539836
chr1	153581170	153582133
chr1	153599131	153601130
chr1	153606220	153607102
chr1	153630926	153631628
chr1	153699415	153700648
chr1	153735712	153736860
chr1	153745933	153746912
chr1	153755443	153756654
chr1	153769413	153770385
chr1	153853088	153853931
chr1	153894261	153895583
chr1	153917933	153918955
chr1	153939477	153940708
chr1	154192667	154194174
chr1	154298243	154299654
chr1	154306873	154308132
chr1	154377572	154378418
chr1	154391734	154393275
chr1	154401212	154402343
chr1	154404804	154405748
chr1	154447110	154447756
chr1	154497076	154497776
chr1	154531060	154532432
chr1	154579787	154580969
chr1	154599447	154600788
chr1	154739914	154740473
chr1	154908412	154910305
chr1	154946614	154947716
chr1	154955257	154956518
chr1	154972929	154973934
chr1	154989380	154990425
chr1	155016643	155017510
chr1	155056523	155059025
chr1	155063503	155064511
chr1	155099116	155100662
chr1	155107797	155109239
chr1	155145136	155145973
chr1	155164129	155164968
chr1	155178280	155179277
chr1	155188589	155189801
chr1	155213372	155215051
chr1	155231606	155232697
chr1	155242747	155243806
chr1	155292762	155294675
chr1	155532021	155533510
chr1	155579159	155580156
chr1	155657793	155659315
chr1	155714733	155715680
chr1	155880511	155881436
chr1	155952866	155953963
chr1	156023644	156024987
chr1	156075859	156076824
chr1	156083553	156086035
chr1	156099637	156100725
chr1	156110451	156111807
chr1	156122088	156122851
chr1	156163188	156164043
chr1	156182429	156184683
chr1	156186071	156186833
chr1	156230667	156231605
chr1	156251140	156253336
chr1	156264905	156266040
chr1	156425916	156427842
chr1	156474154	156475920
chr1	156561146	156562120
chr1	156570857	156572518
chr1	156585946	156586912
chr1	156607680	156609121
chr1	156611233	156612332
chr1	156629733	156630876
chr1	156720354	156722467
chr1	156783210	156784223
chr1	156852106	156852985
chr1	156859561	156860233
chr1	156889732	156890730
chr1	157003683	157004530
chr1	157060269	157061328
chr1	157107729	157109268
chr1	157124576	157126225
chr1	157153496	157154137
chr1	157374531	157374869
chr1	157948190	157949000
chr1	157962741	157964061
chr1	157972098	157973889
chr1	157972098	157973889
chr1	157979249	157982265
chr1	157979249	157982265
chr1	157989087	157990022
chr1	158014914	158016328
chr1	158101871	158102391
chr1	158119053	158120310
chr1	158966309	158967317
chr1	158978513	158979027
chr1	158985230	158985937
chr1	159025710	159026932
chr1	159095678	159096156
chr1	159199176	159199735
chr1	159526482	159527235
chr1	159750231	159751541
chr1	159818395	159819144
chr1	159893948	159895811
chr1	159940681	159941439
chr1	160001199	160001990
chr1	160031750	160032538
chr1	160070675	160071412
chr1	160138942	160139925
chr1	160232000	160232929
chr1	160260800	160261538
chr1	160344917	160345653
chr1	160759814	160760803
chr1	160806638	160808240
chr1	160982904	160983248
chr1	161067364	161067793
chr1	161123433	161124406
chr1	161135582	161136460
chr1	161147007	161147912
chr1	161154915	161155752
chr1	161171512	161172727
chr1	161283466	161284454
chr1	161359052	161360332
chr1	161368933	161370172
chr1	161455859	161456703
chr1	161462660	161463431
chr1	161468294	161469172
chr1	161646124	161647307
chr1	161676114	161677156
chr1	161695520	161697716
chr1	161719296	161720560
chr1	161735857	161736862
chr1	161963560	161964629
chr1	162044007	162045185
chr1	162131567	162132451
chr1	162183052	162183982
chr1	162390500	162391458
chr1	162467558	162468091
chr1	162530382	162532119
chr1	162601281	162602667
chr1	162646473	162647151
chr1	162660442	162661228
chr1	162722636	162723674
chr1	162869298	162870042
chr1	162939600	162940494
chr1	163291153	163292162
chr1	164527971	164528520
chr1	164704734	164705486
chr1	164772352	164773123
chr1	165361824	165363101
chr1	165436586	165437810
chr1	165451215	165452053
chr1	165464172	165464812
chr1	165508422	165510073
chr1	165599405	165601568
chr1	165599405	165601568
chr1	165666989	165668169
chr1	165796744	165797682
chr1	165805979	165806520
chr1	165820188	165820668
chr1	166049782	166050716
chr1	166135786	166136911
chr1	166139796	166140634
chr1	166808082	166808885
chr1	166844782	166845977
chr1	166890346	166890681
chr1	167188963	167190189
chr1	167190863	167191618
chr1	167408595	167409278
chr1	167424260	167425294
chr1	167522273	167523639
chr1	167640525	167641426
chr1	167664096	167665131
chr1	167683414	167684923
chr1	167690405	167692099
chr1	167724922	167725750
chr1	167754241	167754920
chr1	167772451	167772924
chr1	167866168	167866615
chr1	167905000	167906470
chr1	168050589	168051626
chr1	168147561	168149093
chr1	168194343	168195610
chr1	168311688	168312299
chr1	168410186	168411342
chr1	169080310	169080724
chr1	169281291	169281781
chr1	169336788	169337576
chr1	169454345	169455749
chr1	169763461	169764547
chr1	169862824	169863654
chr1	170131601	170132358
chr1	170531641	170532896
chr1	170548599	170549090
chr1	171282917	171283424
chr1	171454238	171455127
chr1	171710833	171711911
chr1	171750020	171751437
chr1	171786715	171787416
chr1	171868099	171868567
chr1	171967755	171968374
chr1	172327614	172328565
chr1	172468579	172470167
chr1	172501234	172502958
chr1	173159323	173160471
chr1	173500363	173500837
chr1	173683571	173684722
chr1	173793333	173794558
chr1	173836370	173838133
chr1	173839289	173839990
chr1	173990324	173991273
chr1	173991298	173991866
chr1	174020801	174021523
chr1	174128162	174129574
chr1	174367124	174367821
chr1	174768435	174769358
chr1	174967755	174969916
chr1	174992068	174993012
chr1	174998418	174999484
chr1	176175861	176177062
chr1	177789784	177790618
chr1	178006276	178007412
chr1	178026993	178027724
chr1	178062321	178063853
chr1	178095869	178096223
chr1	178511569	178512524
chr1	178619677	178620704
chr1	178985987	178986650
chr1	178990965	178991710
chr1	178995394	178996296
chr1	179050199	179051609
chr1	179115417	179116312
chr1	179133632	179134022
chr1	179262246	179264397
chr1	179262246	179264397
chr1	179334439	179335508
chr1	179519953	179521083
chr1	179716592	179717471
chr1	179783552	179784764
chr1	179850947	179852385
chr1	179923680	179924378
chr1	180156086	180156634
chr1	180471199	180472358
chr1	180895016	180896342
chr1	180957551	180957973
chr1	180991065	180992533
chr1	181042563	181043445
chr1	181057233	181058232
chr1	181142855	181143728
chr1	181482880	181483741
chr1	181507574	181508769
chr1	181517457	181518127
chr1	181616476	181617128
chr1	181998778	181999612
chr1	182038127	182038617
chr1	182089359	182091878
chr1	182227951	182229016
chr1	182248505	182249846
chr1	182270759	182271368
chr1	182360130	182361477
chr1	182572876	182573986
chr1	182583187	182584803
chr1	182731682	182732086
chr1	182758314	182759344
chr1	182807735	182809756
chr1	182973264	182973921
chr1	182991075	182994016
chr1	183203441	183204440
chr1	183250645	183251229
chr1	183280728	183281100
chr1	183385717	183386452
chr1	183439988	183442584
chr1	183604127	183605738
chr1	183884860	183885725
chr1	183911853	183912823
chr1	183971136	183971700
chr1	183989994	183990662
chr1	184265417	184266463
chr1	184355124	184356744
chr1	184460373	184461325
chr1	184536619	184537550
chr1	184584307	184585037
chr1	184598235	184599353
chr1	184723188	184724992
chr1	184923367	184923860
chr1	185014038	185015509
chr1	185125025	185126926
chr1	185285195	185287574
chr1	185308031	185309037
chr1	185374938	185375818
chr1	185452662	185453963
chr1	185759479	185760034
chr1	185908190	185908696
chr1	186051282	186051886
chr1	186343972	186345306
chr1	186649136	186650169
chr1	186797999	186798682
chr1	187126100	187127279
chr1	187811536	187812309
chr1	192232625	192232999
chr1	192757326	192757709
chr1	192777264	192778709
chr1	193027544	193029196
chr1	193073595	193074962
chr1	193090465	193091745
chr1	197170042	197171007
chr1	197233838	197234221
chr1	197743759	197744382
chr1	197871171	197872312
chr1	198125424	198127225
chr1	198127605	198128658
chr1	199241778	199242105
chr1	200119620	200120538
chr1	200149548	200150430
chr1	200218109	200218657
chr1	200345568	200346408
chr1	200638311	200639809
chr1	200707598	200709459
chr1	200849103	200850039
chr1	200961627	200962505
chr1	201245977	201247057
chr1	201252044	201252683
chr1	201279903	201280737
chr1	201303767	201305235
chr1	201368051	201368930
chr1	201404815	201405485
chr1	201417171	201418123
chr1	201430018	201430837
chr1	201458091	201458945
chr1	201464828	201465879
chr1	201507573	201509705
chr1	201533938	201535431
chr1	201574107	201575292
chr1	201616935	201617882
chr1	201631631	201632696
chr1	201665515	201666337
chr1	201672654	201673719
chr1	201699158	201700930
chr1	201738899	201739936
chr1	201797919	201798918
chr1	201871143	201871879
chr1	201923491	201925085
chr1	202091658	202092538
chr1	202112444	202114657
chr1	202317480	202318348
chr1	202779124	202780986
chr1	202790579	202792216
chr1	202806487	202807715
chr1	202823442	202824523
chr1	202857556	202858412
chr1	202895928	202897032
chr1	202921920	202922398
chr1	202935611	202936803
chr1	202995051	202995911
chr1	203158689	203159519
chr1	203208849	203209455
chr1	203295884	203297109
chr1	203434597	203435817
chr1	203456187	203457512
chr1	203481655	203482610
chr1	203503316	203504189
chr1	203605144	203606185
chr1	203642605	203643765
chr1	203661802	203662677
chr1	203704468	203704863
chr1	203764074	203765704
chr1	203830299	203831372
chr1	203964998	203967201
chr1	204041366	204044101
chr1	204083746	204084199
chr1	204175858	204176559
chr1	204222808	204223778
chr1	204231604	204232427
chr1	204245571	204246075
chr1	204295930	204296662
chr1	204380138	204381413
chr1	204414875	204415549
chr1	204434891	204436166
chr1	204462665	204464326
chr1	204476946	204477552
chr1	204484733	204486032
chr1	204592196	204592984
chr1	204606292	204607221
chr1	205110890	205111245
chr1	205179654	205181313
chr1	205215886	205217483
chr1	205227003	205229218
chr1	205227003	205229218
chr1	205253560	205254571
chr1	205323738	205324992
chr1	205427999	205428586
chr1	205446695	205447828
chr1	205473401	205474662
chr1	205568080	205569208
chr1	205614151	205614582
chr1	205717967	205720032
chr1	205743220	205744799
chr1	205781668	205782787
chr1	206785449	206786316
chr1	206808352	206809444
chr1	206827944	206828827
chr1	206939721	206940134
chr1	206988342	206988670
chr1	207063268	207064986
chr1	207063268	207064986
chr1	207226214	207227001
chr1	207237910	207238403
chr1	207378253	207379076
chr1	207494022	207495553
chr1	207566708	207567931
chr1	207924838	207925753
chr1	207985260	207985699
chr1	208098208	208098961
chr1	208195197	208195563
chr1	208239213	208239921
chr1	208259059	208260473
chr1	208343286	208344129
chr1	208353018	208353849
chr1	208418388	208419040
chr1	208561441	208562060
chr1	209630220	209630662
chr1	209740502	209741590
chr1	209782425	209783166
chr1	209824198	209825226
chr1	209920688	209921810
chr1	209942470	209944079
chr1	210000829	210001762
chr1	210013163	210013826
chr1	210023764	210024188
chr1	210046682	210047290
chr1	210057582	210058443
chr1	210386412	210387298
chr1	210435157	210435774
chr1	210467544	210468986
chr1	210484086	210484967
chr1	210516294	210517081
chr1	210566781	210568281
chr1	210612145	210612974
chr1	210669136	210669918
chr1	210831043	210831625
chr1	211003516	211003986
chr1	211078921	211079960
chr1	211242233	211242832
chr1	211306884	211307494
chr1	211431796	211432951
chr1	211433809	211434530
chr1	211499501	211500717
chr1	211555792	211556720
chr1	211590137	211590673
chr1	211750758	211752718
chr1	211805385	211806206
chr1	211908531	211909992
chr1	212208066	212209368
chr1	212282354	212282793
chr1	212376650	212377161
chr1	212415370	212416583
chr1	212457943	212459340
chr1	212587999	212588812
chr1	212643217	212644191
chr1	212655752	212656786
chr1	212661631	212662591
chr1	212680512	212681359
chr1	212719285	212719947
chr1	212731298	212732737
chr1	212872309	212873837
chr1	212872309	212873837
chr1	212964588	212965552
chr1	213031103	213032250
chr1	213188331	213189512
chr1	213223981	213225288
chr1	213500123	213501710
chr1	213572656	213573635
chr1	213898187	213899079
chr1	214454572	214455466
chr1	214608011	214608693
chr1	214724309	214726000
chr1	214776127	214776801
chr1	214843505	214844033
chr1	214873418	214874470
chr1	215657392	215658090
chr1	215740286	215741032
chr1	215838473	215838907
chr1	216218750	216219416
chr1	216247281	216247958
chr1	216383181	216384298
chr1	216629966	216630454
chr1	216773976	216775031
chr1	216988657	216989514
chr1	217075739	217076737
chr1	217226991	217227682
chr1	217308557	217309391
chr1	218083859	218084754
chr1	218337123	218338256
chr1	218457943	218459021
chr1	218477910	218478351
chr1	218598754	218599623
chr1	218612772	218613529
chr1	219239445	219240272
chr1	219346984	219348586
chr1	219437762	219438443
chr1	219887035	219887770
chr1	219944135	219945177
chr1	219985632	219986395
chr1	220219209	220220593
chr1	220266907	220268249
chr1	220444961	220446156
chr1	220473599	220474228
chr1	220516170	220516838
chr1	220869798	220870897
chr1	220880776	220881562
chr1	220981504	220982369
chr1	221017090	221017482
chr1	221052111	221053316
chr1	221914781	221916891
chr1	222000039	222000813
chr1	222012793	222013998
chr1	222060065	222060990
chr1	222134668	222135546
chr1	222227690	222228566
chr1	222263372	222263829
chr1	222546945	222548089
chr1	222638195	222639345
chr1	222762349	222763920
chr1	222790491	222792367
chr1	222885618	222887187
chr1	222987944	222989151
chr1	223003397	223003959
chr1	223084943	223085575
chr1	223610229	223610821
chr1	223799571	223800132
chr1	223815847	223816512
chr1	223839825	223840591
chr1	223888678	223889566
chr1	223913842	223914845
chr1	223952398	223953696
chr1	224032910	224033770
chr1	224370437	224371212
chr1	224371354	224372803
chr1	224517288	224518404
chr1	224622362	224623004
chr1	224638661	224638975
chr1	224646380	224647990
chr1	224690825	224691793
chr1	224716487	224717984
chr1	224766933	224767948
chr1	224914149	224915386
chr1	224946952	224948427
chr1	225117088	225117865
chr1	225614243	225615628
chr1	225632504	225633063
chr1	225642465	225642786
chr1	225840756	225841888
chr1	225857824	225859745
chr1	225965099	225965973
chr1	226069728	226070794
chr1	226111575	226112540
chr1	226186435	226187507
chr1	226249460	226251156
chr1	226270524	226272022
chr1	226297601	226298768
chr1	226308786	226309678
chr1	226309911	226310688
chr1	226595126	226596229
chr1	226606862	226607505
chr1	226730295	226730840
chr1	226797492	226798132
chr1	226814137	226814797
chr1	226820341	226821205
chr1	226850197	226851368
chr1	226864623	226865749
chr1	226890721	226891822
chr1	226896001	226896871
chr1	226950977	226952264
chr1	226997479	226998683
chr1	227002371	227003263
chr1	227050699	227051845
chr1	227058204	227059293
chr1	227127023	227128531
chr1	227505824	227506648
chr1	227637531	227638515
chr1	227750803	227751841
chr1	227915878	227916880
chr1	227922268	227923469
chr1	227975410	227976335
chr1	227996279	227996707
chr1	228057428	228058112
chr1	228296384	228297908
chr1	228327186	228328470
chr1	228352750	228354582
chr1	228400458	228401693
chr1	228565528	228566981
chr1	228593695	228595719
chr1	228624634	228625772
chr1	228644779	228647522
chr1	228660331	228661641
chr1	228673868	228675139
chr1	228715445	228716137
chr1	229158304	229158937
chr1	229205951	229206660
chr1	229244771	229245787
chr1	229335511	229336515
chr1	229406198	229407211
chr1	229583036	229585278
chr1	229643596	229644531
chr1	229694303	229695435
chr1	229714629	229715444
chr1	229761533	229762539
chr1	230202325	230202701
chr1	230239618	230240097
chr1	230248970	230250362
chr1	230449271	230450191
chr1	230480793	230481836
chr1	230562118	230562792
chr1	230777668	230778653
chr1	230909183	230910443
chr1	230942425	230943079
chr1	230994454	230995579
chr1	231054897	231055400
chr1	231114492	231115185
chr1	231120597	231121252
chr1	231274816	231276706
chr1	231313673	231314181
chr1	231328284	231328968
chr1	231336168	231336873
chr1	231376550	231377445
chr1	231663790	231664859
chr1	231707214	231708086
chr1	231709135	231709642
chr1	231761535	231763534
chr1	231778559	231779661
chr1	231869686	231870484
chr1	231986572	231987171
chr1	232004964	232005835
chr1	232039125	232039834
chr1	232059822	232060854
chr1	232182446	232183026
chr1	232278116	232279055
chr1	232297632	232298491
chr1	232573970	232574679
chr1	232606360	232606957
chr1	232643927	232644486
chr1	232678205	232678920
chr1	232765870	232766861
chr1	232791192	232791843
chr1	233217251	233217926
chr1	233382802	233383339
chr1	234508664	234509630
chr1	234614273	234615058
chr1	234663368	234664727
chr1	234679476	234680823
chr1	234718353	234719232
chr1	234735275	234736722
chr1	234743657	234744542
chr1	234748251	234749274
chr1	234858902	234861021
chr1	234907654	234908889
chr1	235105386	235106437
chr1	235114105	235115839
chr1	235122903	235123956
chr1	235132791	235133925
chr1	235153860	235154322
chr1	235246384	235247734
chr1	235253573	235254594
chr1	235291415	235292851
chr1	235530361	235531587
chr1	235667504	235669002
chr1	235994336	235994922
chr1	236035184	236036379
chr1	236046104	236047462
chr1	236080322	236083027
chr1	236080322	236083027
chr1	236098667	236099608
chr1	236134952	236135637
chr1	236142612	236143998
chr1	236187848	236188453
chr1	236202685	236203699
chr1	236221004	236222041
chr1	236226822	236227966
chr1	236262397	236263943
chr1	236304381	236305542
chr1	236331782	236332642
chr1	236444495	236445968
chr1	236687022	236688224
chr1	236767348	236768729
chr1	236849132	236850390
chr1	236958169	236959456
chr1	237083679	237084363
chr1	237811291	237812078
chr1	238027551	238028519
chr1	239977497	239978285
chr1	240501056	240501527
chr1	240739411	240739961
chr1	241520302	241520944
chr1	241682343	241683339
chr1	241948345	241949389
chr1	242010947	242011867
chr1	242020489	242020855
chr1	242388141	242389070
chr1	242410392	242411375
chr1	243277412	243277977
chr1	243418122	243418909
chr1	243418122	243418909
chr1	243419110	243419795
chr1	244012349	244013356
chr1	244013886	244014863
chr1	244080367	244080874
chr1	244113088	244114193
chr1	244230947	244231757
chr1	244375955	244376744
chr1	244486110	244486654
chr1	244504737	244505778
chr1	244614233	244615695
chr1	244815734	244816978
chr1	244997078	244999338
chr1	245025796	245028277
chr1	245132972	245134884
chr1	245255087	245255897
chr1	245316335	245317739
chr1	245675413	245677044
chr1	245747218	245747737
chr1	246037777	246038971
chr1	246057812	246058573
chr1	246215406	246215759
chr1	246378211	246379001
chr1	246728950	246730517
chr1	246771853	246772789
chr1	247110392	247110965
chr1	247267135	247268117
chr1	247373379	247374175
chr1	247495273	247496693
chr1	247530796	247531697
chr1	249120052	249121123
chr1	249131814	249133822
chr1	249131814	249133822
chr1	249152122	249153487
chr1	249166702	249168700
chr1	249199789	249201838
chr10	439917	441189
chr10	527128	527691
chr10	593304	594008
chr10	603751	604413
chr10	670399	671665
chr10	711368	712202
chr10	711368	712202
chr10	727865	728178
chr10	733758	735054
chr10	977542	978231
chr10	1033438	1035052
chr10	1094401	1095775
chr10	1101699	1102295
chr10	1102402	1103118
chr10	1115708	1116342
chr10	1366255	1366733
chr10	1371301	1371945
chr10	1796540	1797030
chr10	2377576	2378283
chr10	3042159	3042515
chr10	3087832	3088702
chr10	3110205	3111220
chr10	3214460	3215786
chr10	3440979	3442374
chr10	3448733	3449409
chr10	3558314	3559449
chr10	3580933	3582048
chr10	3826003	3827760
chr10	3921283	3921753
chr10	3953479	3953842
chr10	4059936	4060700
chr10	4358371	4359079
chr10	4386689	4387315
chr10	4697509	4697958
chr10	4705040	4705770
chr10	4730774	4731196
chr10	5454316	5454823
chr10	5543842	5544307
chr10	5726310	5727206
chr10	5854928	5856011
chr10	5856197	5856471
chr10	5882169	5883329
chr10	5931485	5932235
chr10	6128145	6128784
chr10	6166367	6166965
chr10	6205405	6206339
chr10	6244443	6245329
chr10	6245587	6247221
chr10	6280864	6281779
chr10	6316935	6317816
chr10	6441199	6442019
chr10	7029056	7030002
chr10	7342998	7343691
chr10	7475160	7475811
chr10	7638118	7638707
chr10	7808199	7808902
chr10	7839405	7839786
chr10	7860148	7860798
chr10	8337887	8338425
chr10	8374014	8374874
chr10	9316075	9316845
chr10	9341914	9342462
chr10	10375602	10376294
chr10	10395139	10395743
chr10	11027493	11028014
chr10	11077251	11077760
chr10	11152395	11152952
chr10	11206256	11207573
chr10	11251774	11253263
chr10	11378464	11379192
chr10	11525592	11525920
chr10	11575433	11576246
chr10	11726551	11727426
chr10	12084167	12085831
chr10	12171024	12172712
chr10	12237365	12238824
chr10	13341392	13342191
chr10	13628721	13629217
chr10	13650103	13650521
chr10	13726240	13726859
chr10	13811425	13812706
chr10	13818648	13819291
chr10	13927425	13928341
chr10	14001233	14002124
chr10	14089179	14090332
chr10	14439074	14439497
chr10	14523817	14524211
chr10	14539404	14539775
chr10	14879630	14881412
chr10	14919899	14921233
chr10	14977891	14979277
chr10	15001334	15002241
chr10	15138971	15139861
chr10	15556996	15557582
chr10	16478633	16479276
chr10	16858956	16860051
chr10	17008026	17008822
chr10	17027957	17029278
chr10	17031660	17032561
chr10	17243174	17243958
chr10	17270107	17271978
chr10	17385972	17386975
chr10	17472832	17473372
chr10	17575668	17576600
chr10	17685399	17686490
chr10	17713421	17713744
chr10	18610002	18610920
chr10	18940289	18940832
chr10	18947484	18949156
chr10	21625172	21625917
chr10	21661656	21662447
chr10	21696318	21697106
chr10	21814271	21815804
chr10	21822453	21824461
chr10	22517896	22518519
chr10	22604747	22605806
chr10	22629897	22630807
chr10	22908977	22909748
chr10	22920692	22921100
chr10	23094213	23095067
chr10	23138056	23139076
chr10	23300496	23301028
chr10	23326239	23326907
chr10	23342006	23342440
chr10	23354288	23354987
chr10	23405567	23406236
chr10	23409496	23409929
chr10	23665159	23665733
chr10	23727204	23728174
chr10	23899874	23900216
chr10	25304993	25306193
chr10	25372446	25373157
chr10	25391073	25391746
chr10	25400808	25401435
chr10	25463428	25464345
chr10	27026234	27027046
chr10	27149875	27150201
chr10	27155652	27156450
chr10	27443270	27444412
chr10	27481177	27481955
chr10	27529019	27529977
chr10	27792695	27793725
chr10	28797196	28797941
chr10	29181682	29182522
chr10	29194682	29195398
chr10	29236132	29236833
chr10	29264492	29265345
chr10	29296295	29297535
chr10	29438880	29439527
chr10	29446176	29447322
chr10	29497702	29498207
chr10	29517544	29518827
chr10	29607293	29608065
chr10	29632668	29633952
chr10	29678416	29679292
chr10	29734405	29734891
chr10	29824101	29825374
chr10	29844662	29845668
chr10	29924394	29924968
chr10	29947927	29949147
chr10	30045990	30046648
chr10	30637619	30638417
chr10	30722233	30724097
chr10	31269741	31270458
chr10	31320473	31321822
chr10	31892054	31893108
chr10	31938882	31939552
chr10	31958281	31958960
chr10	31996152	31997176
chr10	32038840	32039610
chr10	32216636	32218334
chr10	32216636	32218334
chr10	32250240	32250989
chr10	32293112	32293786
chr10	32428066	32428853
chr10	32502631	32503315
chr10	32634937	32636232
chr10	32734848	32735492
chr10	33247200	33247909
chr10	33269239	33270060
chr10	33389659	33390354
chr10	33434794	33435371
chr10	33453164	33453553
chr10	33547789	33548557
chr10	33950705	33951508
chr10	34216299	34216796
chr10	35174568	35175636
chr10	35378861	35379780
chr10	35415358	35416660
chr10	35454085	35454432
chr10	35461327	35461868
chr10	35625848	35626540
chr10	38146444	38147310
chr10	38264920	38265555
chr10	38299295	38300282
chr10	42379326	42381112
chr10	42383822	42385755
chr10	42383822	42385755
chr10	42392522	42395203
chr10	42599111	42600367
chr10	42970870	42971781
chr10	43039404	43039891
chr10	43133186	43134251
chr10	43277672	43278613
chr10	43356849	43357419
chr10	43383843	43384666
chr10	43600094	43600959
chr10	43600094	43600959
chr10	43804416	43804864
chr10	43891282	43893155
chr10	43902694	43905047
chr10	43902694	43905047
chr10	43916341	43916890
chr10	43931500	43932644
chr10	43950431	43951545
chr10	44143715	44144589
chr10	44185186	44185990
chr10	44675719	44676233
chr10	44796263	44797140
chr10	44806543	44806997
chr10	45359837	45361203
chr10	45374406	45375070
chr10	45430892	45431787
chr10	45491547	45492142
chr10	46089762	46090665
chr10	46167750	46169011
chr10	46222224	46223023
chr10	47098493	47099656
chr10	47605784	47606415
chr10	47622844	47623805
chr10	47699880	47700381
chr10	49514174	49514862
chr10	50012836	50013420
chr10	50605843	50606471
chr10	50746656	50747876
chr10	50970029	50970597
chr10	51039386	51039917
chr10	51572038	51572634
chr10	51827462	51828188
chr10	52383507	52385254
chr10	53678320	53679231
chr10	53986241	53986560
chr10	54538512	54538966
chr10	54624203	54624757
chr10	60026560	60027210
chr10	60079995	60080795
chr10	60144620	60145360
chr10	60194903	60195588
chr10	60723410	60724207
chr10	60785705	60786563
chr10	61666120	61666840
chr10	62060085	62060629
chr10	62149922	62150442
chr10	62557553	62558342
chr10	62661506	62661995
chr10	62703564	62704676
chr10	62738147	62738522
chr10	63091984	63092766
chr10	63656461	63657060
chr10	63808645	63809464
chr10	64027837	64028829
chr10	64066025	64066676
chr10	64342470	64343033
chr10	64378725	64379080
chr10	64397471	64398297
chr10	64564833	64565864
chr10	64575949	64576545
chr10	64620598	64621303
chr10	64693962	64694447
chr10	64721740	64722182
chr10	64875510	64875921
chr10	64892286	64893465
chr10	65028717	65029253
chr10	65275069	65275575
chr10	65388435	65389020
chr10	65389091	65390530
chr10	65434860	65435312
chr10	65471695	65472331
chr10	68737042	68737363
chr10	69523926	69524383
chr10	69644032	69644917
chr10	69834322	69835614
chr10	69913207	69913666
chr10	70020371	70021511
chr10	70091061	70092021
chr10	70166823	70167690
chr10	70286699	70287621
chr10	70480312	70481240
chr10	70660336	70661636
chr10	70715203	70716424
chr10	70883462	70884501
chr10	70939080	70940196
chr10	70984947	70985694
chr10	71002247	71003246
chr10	71038208	71039056
chr10	71168276	71169219
chr10	71254319	71255375
chr10	71481733	71482060
chr10	71633997	71634596
chr10	71892302	71893043
chr10	71906171	71906931
chr10	71929845	71930679
chr10	71993018	71993724
chr10	72015178	72016129
chr10	72424047	72425470
chr10	72486543	72487271
chr10	72538686	72539310
chr10	72575446	72576351
chr10	72641996	72642628
chr10	72800924	72801275
chr10	73380982	73381445
chr10	73588925	73589465
chr10	73610176	73611277
chr10	73620011	73620895
chr10	73627818	73628384
chr10	73648400	73649204
chr10	73670980	73671775
chr10	73680260	73681191
chr10	73740545	73742166
chr10	73746454	73747388
chr10	73768875	73769964
chr10	73804162	73804960
chr10	74008343	74008945
chr10	74020068	74020986
chr10	74032495	74034007
chr10	74057371	74058314
chr10	74067964	74068653
chr10	74114208	74115095
chr10	74123813	74124517
chr10	74385392	74386069
chr10	74856140	74857165
chr10	74927222	74928404
chr10	74942121	74942891
chr10	75006578	75007375
chr10	75011768	75012738
chr10	75173391	75174087
chr10	75312774	75313520
chr10	75350900	75351289
chr10	75531843	75532947
chr10	75545004	75545953
chr10	75608797	75609272
chr10	75617046	75617680
chr10	75652158	75653126
chr10	75878270	75878865
chr10	75910302	75911558
chr10	75935714	75936998
chr10	76585171	76586788
chr10	76585171	76586788
chr10	76957403	76958406
chr10	76969638	76970555
chr10	76990336	76990801
chr10	76995388	76995951
chr10	77054217	77055169
chr10	77161774	77162746
chr10	77524275	77525779
chr10	77862957	77863372
chr10	78215782	78216351
chr10	78269034	78269767
chr10	78310573	78311100
chr10	78435571	78436302
chr10	79002380	79003282
chr10	79165359	79166129
chr10	79291188	79291787
chr10	79369416	79370445
chr10	79516005	79516438
chr10	79608853	79609355
chr10	79793314	79793825
chr10	79802812	79803780
chr10	79935039	79936058
chr10	80053246	80053794
chr10	80062857	80063421
chr10	80516052	80517044
chr10	80568749	80569177
chr10	80704226	80705093
chr10	80720150	80720891
chr10	80732507	80734157
chr10	80734293	80734806
chr10	80830347	80832214
chr10	80861461	80862435
chr10	80876671	80877231
chr10	80909246	80910235
chr10	80980845	80981355
chr10	80998787	80999669
chr10	81006304	81007134
chr10	81026039	81026690
chr10	81078531	81079124
chr10	81158747	81159679
chr10	81163110	81164419
chr10	81197457	81198612
chr10	81321397	81322515
chr10	81838151	81839010
chr10	81918236	81918691
chr10	82049161	82049856
chr10	82167828	82168949
chr10	82213011	82213867
chr10	82224019	82225349
chr10	82234156	82234698
chr10	82259329	82260432
chr10	82269191	82269827
chr10	82279871	82280382
chr10	82339094	82339453
chr10	82377546	82378174
chr10	82393686	82394062
[truncated: 14,749 more rows]
