# Supplementary material for: Enhancer-targeted genome editing selectively blocks innate resistance to oncokinase inhibition
Source: HighWire-hosted journal article supplement (doi:10.1101/gr.166231.113), 2014-01-17
Supplement: Supplemental_Table5.xlsx [file Supplemental_Table5.xlsx]

## Sheet: PLX4032 Expression Profiling
Supplementary Table 5
Differentially expressed genes with BRAF inhibition and MITF depletion
Expression profiling from COLO829 melanoma cells treated with PLX4032 in the presence or absence of MITF.
Data shown is fold change relative to shCtrl DMSO for genes significantly altered by PLX4032 and the classification of these genes' dependence on MITF for PLX4032-responsiveness
Gene Symbol	shCtrl DMSO (1)	shCtrl DMSO (2)	shCtrl PLX4032 (1)	shCtrl PLX4032 (2)	shMITF PLX4032 (1)	shMITF PLX4032 (2)	MITF-Dependent
ABCB5	0.862567	1.15933	3.81185	3.50091	0.650723	0.677034	Yes
ACSF2	0.988202	1.01194	2.34959	2.0699	0.948864	0.901608	Yes
ADAMTS1	1.00567	0.994361	0.13356	0.161597	0.750708	0.821934	Yes
ANKRD44	0.930258	1.07497	2.14194	2.18166	0.814255	0.926472	Yes
AREG	0.89088	1.12249	0.221389	0.238748	0.616126	0.769713	Yes
B4GALT6	0.972438	1.02834	0.369558	0.353085	0.864551	0.871092	Yes
BCAN	1.05741	0.945703	13.1749	11.2403	2.26257	2.12213	Yes
BIN3	1.02064	0.97978	0.448396	0.420735	0.917308	0.979561	Yes
C21orf91	0.976703	1.02385	2.92134	2.51581	1.00303	1.03497	Yes
CA14	0.969229	1.03175	2.31819	2.0292	1.11946	0.980841	Yes
CABLES1	1.01605	0.984206	2.45028	2.55813	0.778526	0.787032	Yes
CDH19	0.934032	1.07063	0.292014	0.299055	2.39368	2.55912	Yes
CDKN2B	0.961726	1.0398	0.353005	0.354693	0.744967	0.716642	Yes
CPM	0.990214	1.00988	3.15106	2.80941	1.29203	1.49158	Yes
DKK1	0.880625	1.13556	0.157675	0.184941	0.588735	0.683045	Yes
EPHA2	0.988116	1.01203	0.465366	0.531673	1.56486	1.65681	Yes
ETV1	0.986274	1.01392	0.183262	0.1926	0.459442	0.522898	Yes
F2R	0.967149	1.03397	0.318185	0.333348	0.774276	0.844629	Yes
FAM167B	1.00342	0.996594	2.33752	1.77545	0.628966	0.578763	Yes
FAM69C	0.946732	1.05627	5.85909	7.36581	0.921273	0.696109	Yes
FST	0.988753	1.01137	0.432125	0.410932	8.09645	9.35115	Yes
GALNT3	0.947882	1.05498	6.12332	5.59463	1.98734	2.32483	Yes
GEM	0.871013	1.14809	0.122912	0.131022	0.402559	0.468905	Yes
GMPR	0.95964	1.04206	6.65548	5.45687	0.933416	0.90022	Yes
IGSF3	0.991271	1.00881	2.32437	2.06577	0.473993	0.444503	Yes
IL8	0.887371	1.12692	0.126534	0.116679	1.00796	1.02005	Yes
IRF4	0.967987	1.03307	2.39232	2.03227	0.9312	0.817687	Yes
ITGB8	0.979994	1.02041	0.446891	0.455258	1.26927	1.34261	Yes
KCNAB2	1.00153	0.998469	4.76744	4.11007	0.611651	0.532629	Yes
KCNJ13	1.06729	0.936951	83.0165	78.2054	29.7968	27.5678	Yes
KHDRBS3	0.988645	1.01149	0.402587	0.413943	1.77844	1.88778	Yes
KIAA1199	0.971937	1.02887	0.125836	0.122742	0.296841	0.299866	Yes
LGI3	0.981129	1.01923	7.96061	7.42005	1.59238	1.45264	Yes
LOXL3	0.986192	1.014	0.325742	0.35957	2.04014	1.9039	Yes
LRRC39	0.998916	1.00108	8.6832	9.17605	1.25445	2.01788	Yes
LZTS1	1.04109	0.960532	2.49005	2.19331	0.842704	0.808032	Yes
MBP	0.93886	1.06512	8.36614	8.33095	1.75246	1.8463	Yes
MCAM	0.983044	1.01725	0.406067	0.408993	1.64609	1.68727	Yes
MET	0.990288	1.00981	2.73805	2.41152	0.260508	0.234399	Yes
MICAL1	0.991393	1.00868	2.72223	2.28469	1.09438	1.03199	Yes
MLANA	0.956527	1.04545	5.03596	4.43802	0.719935	0.737463	Yes
MLPH	0.858776	1.16445	3.88555	3.24712	0.665809	0.65254	Yes
MMP16	0.963023	1.0384	0.397473	0.414302	1.55267	1.69056	Yes
MRPL44	0.955747	1.0463	2.97936	2.76904	0.787927	0.949939	Yes
MTSS1	0.966139	1.03505	2.80864	2.03103	1.18217	0.992822	Yes
MYO1D	0.971154	1.0297	2.15823	1.9019	0.75247	0.791206	Yes
NAV2	1.01493	0.985285	3.8512	3.6366	0.914856	0.881462	Yes
NPTX1	1.03649	0.964793	0.478057	0.479375	1.02215	1.08831	Yes
NR4A1	0.964156	1.03718	0.444537	0.50939	1.65469	1.65954	Yes
NR4A2	0.986431	1.01376	0.135473	0.13192	1.17031	1.2081	Yes
NRCAM	0.956347	1.04565	0.331159	0.311615	1.70212	1.85134	Yes
NRXN3	1.00117	0.998834	0.311897	0.329824	3.52945	3.65642	Yes
NT5E	0.962302	1.03917	0.187235	0.181982	1.03577	1.02303	Yes
OCA2	0.996032	1.00398	2.40147	2.28259	0.87248	0.900061	Yes
OSBPL3	0.864698	1.15647	0.426844	0.445142	0.87625	1.11607	Yes
OSTM1	0.964141	1.03719	2.27005	2.06824	1.07729	1.07833	Yes
PAX3	0.953448	1.04883	3.98695	3.75269	1.89501	1.89834	Yes
PDLIM4	0.994907	1.00512	0.497873	0.424292	0.950211	0.896536	Yes
PIP4K2A	0.98614	1.01406	2.18579	2.23782	0.905176	0.881754	Yes
PLAUR	0.961501	1.04004	0.382033	0.404501	0.763945	0.882492	Yes
PLXNC1	1.04989	0.952483	2.27728	2.24349	0.353082	0.341435	Yes
RAB27A	1.0015	0.9985	3.1447	3.39291	0.314206	0.463841	Yes
RAB32	0.993351	1.00669	2.66913	2.54582	1.37976	1.22958	Yes
SCHIP1	0.911883	1.09663	0.226094	0.304614	1.12582	1.42447	Yes
SEMA6A	1.02046	0.979955	3.61104	3.42289	0.877876	0.816591	Yes
SERPINB2	0.917109	1.09038	0.282179	0.272045	0.598307	0.668703	Yes
SERPINB8	0.889633	1.12406	0.462938	0.460083	1.17666	1.42798	Yes
SERPINF1	0.928582	1.07691	3.77027	3.4252	0.492522	0.441307	Yes
SETDB2	0.932249	1.07267	3.11327	3.02475	0.820902	0.826142	Yes
SGCD	0.910424	1.09839	3.61796	3.52508	1.50848	1.93738	Yes
SLC26A2	0.917187	1.09029	0.454712	0.504268	1.11413	1.24029	Yes
SLC7A8	0.941648	1.06197	2.02822	2.44559	0.887706	1.02705	Yes
SLC9A7	0.922755	1.08371	0.367005	0.331288	0.804817	0.853866	Yes
SLIT2	0.954257	1.04794	0.424434	0.474299	1.17514	1.33646	Yes
SPRY2	0.932044	1.07291	0.192068	0.17938	0.420519	0.452499	Yes
SQRDL	0.950257	1.05235	0.329842	0.279874	0.799556	1.2479	Yes
STC1	0.935542	1.0689	0.0762694	0.0973943	0.216016	0.219088	Yes
SYTL5	0.974882	1.02577	0.0512991	0.0578984	0.287989	0.324015	Yes
TDRD7	0.957917	1.04393	2.51702	2.35933	0.974559	0.927505	Yes
TFAP2A	1.01336	0.98682	3.00628	2.6245	1.3435	1.3041	Yes
THBS2	1.02356	0.976983	0.277613	0.264486	0.647739	0.635342	Yes
TMEM2	0.923503	1.08283	0.364105	0.39732	1.44311	1.55731	Yes
TNC	1.00091	0.999089	0.366879	0.331472	2.921	2.90761	Yes
TNFAIP3	0.987896	1.01225	0.159373	0.157459	0.365202	0.416712	Yes
TNFRSF12A	1.00171	0.998296	0.115274	0.134166	0.901038	0.898911	Yes
TNFRSF19	1.0236	0.976946	0.246878	0.244055	0.982934	1.00896	Yes
TNS1	0.999514	1.00049	3.41647	3.40032	1.65722	1.63191	Yes
TRIM63	0.995385	1.00464	4.56608	4.8864	0.897505	0.731945	Yes
TRPM1	1.03516	0.966031	10.6923	10.169	1.04439	0.898715	Yes
TSPAN10	1.05683	0.946228	4.82651	3.58506	0.757046	0.596558	Yes
TYRP1	0.958973	1.04278	4.57105	3.87597	1.86003	1.94602	Yes
USP53	0.918369	1.08889	0.234725	0.231716	1.65993	1.80862	Yes
VEGFA	0.953782	1.04846	0.277494	0.268902	0.633207	0.71705	Yes
CDK15	1.0866	0.920301	8.96513	6.30596	1.82383	1.32265	Yes
STK32A	0.966754	1.03439	6.98461	6.62027	1.40527	1.45283	Yes
HAS2	0.906326	1.10336	5.85728	5.23072	0.847478	0.876102	Yes
SLC17A6	0.963882	1.03747	4.95987	5.72014	0.779545	0.812321	Yes
AMBN	1.00252	0.99749	4.49435	4.49189	0.371087	0.389875	Yes
CHRM1	0.991316	1.00876	4.53874	4.43783	2.35656	1.72541	Yes
NCKAP5	0.973026	1.02772	4.37326	4.11715	1.1412	1.0065	Yes
GDPD5	1.01717	0.983121	4.15302	3.81823	1.58983	1.47237	Yes
CYP7B1	0.942091	1.06147	3.94925	3.71796	1.17414	1.12349	Yes
SOCS6	0.955728	1.04632	3.54174	3.3652	0.800011	0.777844	Yes
CA8	0.990687	1.0094	2.82164	3.09312	0.65497	0.56261	Yes
ARHGDIB	0.816744	1.22437	3.09309	2.74011	0.702105	0.740913	Yes
PPFIBP2	0.978229	1.02226	3.11432	2.68356	0.912386	1.02764	Yes
CAB39L	0.963036	1.03838	2.84613	2.73697	0.825247	1.02406	Yes
PLCD4	0.921483	1.08521	2.91113	2.52919	1.25584	1.21919	Yes
CBR4	0.928545	1.07695	2.75349	2.66019	0.969106	1.25517	Yes
NPY6R	0.908078	1.10123	2.81106	2.53613	0.519016	0.610879	Yes
EPM2A	0.977922	1.02258	2.51366	2.64899	0.987464	0.955468	Yes
PPARGC1A	0.987957	1.01219	2.71442	2.41111	0.356864	0.431133	Yes
KCNN2	1.03013	0.97075	2.48019	2.39112	0.587553	0.582842	Yes
OTX1	1.05146	0.951059	2.59352	2.23339	0.839323	0.826672	Yes
HCG4	0.92753	1.07813	2.5962	2.12193	0.61997	0.659267	Yes
HSF4	0.981244	1.01911	2.49986	2.10359	1.23129	0.996417	Yes
BHLHE41	0.943997	1.05932	2.37949	2.18706	0.526055	0.496723	Yes
CA5B	0.970529	1.03037	2.31433	2.20956	0.635504	0.878578	Yes
NUPR1	1.09667	0.91185	2.28002	2.1095	0.834885	0.809843	Yes
EOMES	1.03005	0.970824	2.21376	2.11522	0.98058	0.814399	Yes
MREG	0.992864	1.00719	2.13852	2.03237	0.239081	0.258298	Yes
KRTAP4-7	0.870475	1.1488	2.56383	1.60721	0.786002	0.744689	Yes
VCAN	1.00127	0.998731	0.444087	0.528143	6.20111	6.74673	Yes
C14orf128	0.963643	1.03773	0.478163	0.463724	0.956084	0.998331	Yes
ST8SIA4	0.902582	1.10793	0.510231	0.431568	1.11346	1.38155	Yes
LEPREL1	1.02981	0.97105	0.449032	0.47022	1.77714	1.90954	Yes
TMEM45A	0.93607	1.0683	0.454762	0.4525	0.96841	1.1095	Yes
SERPINA3	1.00499	0.995038	0.480019	0.406658	3.67569	3.64075	Yes
IGFBP5	0.999252	1.00075	0.468997	0.413744	0.963629	0.921451	Yes
FAM46A	0.949908	1.05273	0.450411	0.413704	1.11348	1.20821	Yes
MAML3	1.00439	0.995629	0.416422	0.440649	0.96468	0.962193	Yes
DOCK5	0.982564	1.01774	0.436277	0.41657	0.888155	0.927978	Yes
KITLG	0.849178	1.17761	0.450554	0.403313	1.2016	1.47075	Yes
EHD3	0.948752	1.05402	0.437441	0.405453	1.35861	1.47903	Yes
FGF2	1.02148	0.978968	0.460964	0.377761	1.01492	1.04557	Yes
TLE4	0.938793	1.0652	0.408244	0.399709	1.08137	1.18024	Yes
PTGS1	0.96979	1.03115	0.396291	0.393215	2.41803	2.44037	Yes
ME1	0.986031	1.01417	0.370416	0.4172	0.752708	0.848715	Yes
CTHRC1	0.989405	1.01071	0.362642	0.421861	0.844742	0.793352	Yes
ID1	0.938002	1.0661	0.404398	0.374537	1.10166	1.12683	Yes
LPHN2	0.980194	1.02021	0.350023	0.388397	1.05612	1.11039	Yes
POU3F2	0.966446	1.03472	0.371875	0.362404	0.781337	0.706193	Yes
CXADR	0.996418	1.00359	0.347667	0.374529	0.63659	0.842745	Yes
TNFAIP6	0.978718	1.02174	0.337582	0.358991	1.6881	1.89386	Yes
DLX2	0.922932	1.0835	0.347992	0.339457	0.82304	0.826335	Yes
PODXL	0.976661	1.0239	0.330391	0.339042	2.50992	2.52008	Yes
TSPAN13	0.956362	1.04563	0.326689	0.342354	1.05678	1.17915	Yes
TRPM8	1.00373	0.99628	0.327409	0.338647	1.44085	1.34331	Yes
FAM19A2	0.917854	1.0895	0.257941	0.296618	1.13157	1.31826	Yes
SLITRK6	0.859841	1.16301	0.262222	0.281351	4.88993	5.47873	Yes
ARHGAP6	1.02477	0.975832	0.262817	0.238345	0.775258	0.879077	Yes
IER3	0.951628	1.05083	0.211661	0.199681	0.526991	0.556155	Yes
TGFA	0.941301	1.06236	0.21008	0.182044	0.578072	0.603743	Yes
AGMO	0.900189	1.11088	0.178379	0.20241	0.502192	0.622437	Yes
PDE7B	0.971505	1.02933	0.185119	0.185303	1.45335	1.59281	Yes
CPN1	0.940232	1.06357	0.151041	0.191699	0.447552	0.386083	Yes
ART3	0.970703	1.03018	0.203031	0.140202	1.19991	1.24115	Yes
CD200	0.999338	1.00066	0.181607	0.155764	0.612545	0.647653	Yes
ITGA10	0.954308	1.04788	0.152988	0.174647	2.66558	2.73354	Yes
LPL	0.964097	1.03724	0.0913085	0.0882088	0.463002	0.44356	Yes
ACTN1	0.968672	1.03234	0.489659	0.484309	0.282059	0.255815	No
AGPAT9	0.927883	1.07772	0.330802	0.317205	0.374055	0.453141	No
ANGPTL4	0.978903	1.02155	0.22551	0.195699	0.253365	0.22084	No
APOD	1.02782	0.972932	2.98885	2.65356	3.43141	3.25291	No
ARHGAP11A	0.914607	1.09337	0.332496	0.366705	0.148083	0.167597	No
ARHGAP24	0.897299	1.11446	4.03992	4.17603	3.9494	4.53287	No
ASF1B	0.929194	1.0762	0.452417	0.416196	0.292296	0.331354	No
ATAD2	0.911243	1.0974	0.39406	0.437217	0.208685	0.211986	No
ATP7A	0.95934	1.04238	3.84729	3.73079	2.25309	2.20476	No
AURKA	1.01018	0.989921	0.471329	0.43633	0.27191	0.313086	No
AURKB	1.03388	0.967229	0.492517	0.442285	0.229311	0.243776	No
B3GNT5	0.932554	1.07232	0.47423	0.49565	0.395058	0.485306	No
BEST1	0.972105	1.0287	2.57062	2.4821	1.98407	1.98518	No
BMF	1.0054	0.994632	5.41806	5.86382	8.60428	8.24879	No
BMP1	0.999363	1.00064	2.37091	2.46336	2.67509	2.61163	No
BORA	0.868113	1.15192	0.483284	0.430175	0.251385	0.294563	No
BRIX1	0.999568	1.00043	0.363837	0.372844	0.263041	0.288973	No
BUB1	1.01253	0.987621	0.394814	0.384003	0.203702	0.27267	No
C11orf67	0.998129	1.00187	2.64676	2.35011	2.36113	2.40526	No
C16orf52	0.944285	1.059	0.378817	0.435879	0.387801	0.48187	No
C19orf48	0.975829	1.02477	0.492405	0.413132	0.433661	0.413241	No
C1QTNF6	1.10104	0.908236	2.03483	2.01567	2.02689	2.05923	No
C4orf34	0.900778	1.11015	2.15052	2.06044	1.88326	1.81524	No
C5orf4	1.01121	0.988914	2.65047	2.3432	3.14061	3.23701	No
C5orf41	1.00616	0.993877	2.5819	2.49983	3.59422	3.61008	No
CALCOCO1	0.970246	1.03067	2.65389	2.41145	3.38534	3.3605	No
CCDC80	0.968455	1.03257	2.23476	2.03528	6.56143	7.07088	No
CCNA2	0.969625	1.03133	0.441657	0.438293	0.308533	0.349582	No
CCNB1	0.957344	1.04456	0.458885	0.437684	0.261682	0.308485	No
CCNB2	0.952783	1.04956	0.452184	0.481517	0.272587	0.346492	No
CCND1	0.960386	1.04125	0.513468	0.452286	0.568086	0.538159	No
CCNE2	0.95556	1.04651	0.434266	0.427722	0.143275	0.199807	No
CCRN4L	0.958022	1.04382	0.410621	0.437169	0.45749	0.547893	No
CD36	0.97628	1.0243	2.17704	2.31112	2.07668	2.18452	No
CD82	1.04065	0.960939	2.3431	2.20013	1.54773	1.53701	No
CDC20	0.976868	1.02368	0.483703	0.445359	0.351076	0.378308	No
CDC25A	0.987736	1.01242	0.344791	0.350678	0.123007	0.12726	No
CDC45	0.941795	1.0618	0.304992	0.318605	0.12754	0.15708	No
CDC7	0.911729	1.09682	0.406593	0.448106	0.339686	0.36851	No
CDCA3	0.955834	1.04621	0.461714	0.435932	0.322847	0.382796	No
CDCA5	0.938056	1.06603	0.375929	0.392678	0.168271	0.190433	No
CDCA7L	0.972704	1.02806	0.469761	0.484109	0.149577	0.208775	No
CDK1	0.908216	1.10106	0.403449	0.383601	0.156369	0.250234	No
CDKN3	0.944552	1.0587	0.467608	0.449028	0.261765	0.299847	No
CDT1	0.955352	1.04673	0.538615	0.427323	0.410542	0.344283	No
CEACAM1	0.933264	1.07151	0.301582	0.257122	0.368336	0.362642	No
CEBPD	1.06383	0.939996	2.59698	2.43543	3.47735	3.40362	No
CELF2	0.956564	1.04541	2.12359	1.92797	1.61874	2.02441	No
CEP55	0.957754	1.04411	0.466585	0.471236	0.333597	0.398551	No
CHAC2	0.909816	1.09912	0.25535	0.256708	0.218027	0.260837	No
CITED1	1.06787	0.936442	2.49528	2.18225	1.23112	1.25553	No
CLSPN	0.915712	1.09205	0.298978	0.324923	0.125612	0.144181	No
CNPPD1	1.00999	0.990106	2.08445	1.91977	1.35275	1.22901	No
COL4A3BP	0.942784	1.06069	3.12114	3.21136	4.10478	4.14765	No
CRYL1	0.978562	1.02191	3.39693	3.07678	3.92946	4.22896	No
CSPG4	1.01424	0.985958	0.428764	0.387074	0.577986	0.547723	No
CTSF	0.955231	1.04687	3.76185	3.43136	3.61934	3.3653	No
CYP27A1	1.02008	0.98032	2.18339	2.03588	1.72544	1.81086	No
CYP2U1	0.95668	1.04528	2.07125	1.97978	1.40895	1.38324	No
DCBLD2	0.986007	1.01419	0.358914	0.340048	0.605291	0.604829	No
DDX21	0.95259	1.04977	0.474174	0.472028	0.439626	0.500785	No
DEPDC1	0.942236	1.0613	0.408257	0.361463	0.201429	0.244789	No
DIAPH3	0.96936	1.03161	0.362072	0.376676	0.270835	0.322285	No
DLEU2	1.00641	0.993634	0.513584	0.470137	0.363533	0.418896	No
DLGAP5	0.935845	1.06855	0.413569	0.422905	0.246705	0.296334	No
DTL	0.986128	1.01407	0.412983	0.407854	0.143481	0.173938	No
DTX4	0.954343	1.04784	2.5186	2.2092	1.26432	1.21279	No
DUSP10	0.967696	1.03338	0.48146	0.439722	0.601569	0.641709	No
DUSP4	0.975095	1.02554	0.421688	0.438875	0.555433	0.594894	No
DUSP5	0.94185	1.06174	0.443285	0.502896	0.559505	0.561722	No
DUSP6	0.958803	1.04297	0.154025	0.157293	0.235557	0.234018	No
DYNLT3	1.007	0.993048	0.426526	0.390876	0.725132	0.766355	No
E2F5	0.91448	1.09352	0.261609	0.267724	0.373735	0.445145	No
EGR1	0.96889	1.03211	0.251948	0.186233	0.448121	0.353029	No
EGR3	0.938306	1.06575	0.278384	0.19878	0.499445	0.441777	No
EME1	0.948144	1.05469	0.512046	0.417972	0.306988	0.333927	No
EMP1	0.990245	1.00985	2.51906	2.35909	1.54167	1.56155	No
ENPP2	0.937286	1.06691	4.82141	3.97927	2.23163	2.26203	No
EPS15	0.976729	1.02383	2.23908	2.05899	1.52647	1.4714	No
ERRFI1	0.893544	1.11914	0.276326	0.233221	0.318415	0.329136	No
ETS1	0.986704	1.01348	2.51911	2.3978	1.55789	1.47631	No
ETV4	1.01395	0.986243	0.0661687	0.0626505	0.029599	0.0263148	No
ETV5	1.01526	0.984972	0.258992	0.232205	0.0975018	0.0927777	No
EVI2B	0.898003	1.11358	0.506351	0.487553	0.449544	0.542642	No
EXO1	0.969633	1.03132	0.313061	0.33064	0.119189	0.143414	No
FABP5	0.922843	1.08361	0.178011	0.290834	0.143915	0.14749	No
FAM108C1	0.914522	1.09347	0.230174	0.25376	0.307263	0.239422	No
FAM53B	0.99359	1.00645	2.81293	2.46452	1.5023	1.3412	No
FAM63A	0.895876	1.11623	2.3993	1.78721	2.94729	2.87718	No
FAM83D	0.979669	1.02075	0.531842	0.4699	0.314659	0.362155	No
FAM84B	0.937929	1.06618	0.265775	0.276322	0.270209	0.278284	No
FAM86DP	0.956361	1.04563	0.458106	0.460959	0.679759	0.742115	No
FANCA	0.959667	1.04203	0.440386	0.44666	0.33915	0.332552	No
FANCI	0.946808	1.05618	0.430011	0.450586	0.297053	0.334147	No
FBXO32	0.95839	1.04342	3.23554	2.96882	1.54776	1.59504	No
FGFRL1	0.991243	1.00883	0.299132	0.303423	0.363546	0.299767	No
FKBP5	1.00309	0.996918	0.260579	0.238326	0.218298	0.208013	No
FLJ35776	0.935966	1.06842	0.351092	0.231644	0.452021	0.475307	No
FLRT2	0.897478	1.11423	0.392135	0.344223	0.38351	0.438502	No
FOSL1	0.928271	1.07727	0.356906	0.185498	0.566972	0.450257	No
FOXN3	0.997753	1.00225	2.56474	2.82146	2.87084	3.47432	No
FRMD4A	1.03239	0.968629	0.478539	0.430354	0.476653	0.409565	No
FSTL1	0.905857	1.10393	2.73032	2.70917	2.08949	2.08797	No
GBE1	0.951361	1.05113	0.484195	0.4871	0.342357	0.392737	No
GINS2	0.974497	1.02617	0.348903	0.39583	0.183291	0.161415	No
GJB1	1.08063	0.925386	0.381774	0.383616	0.342005	0.365618	No
GPR124	1.05723	0.945866	2.02305	2.06602	1.45674	1.52647	No
GPR158	0.956537	1.04544	3.71582	3.33917	2.60322	2.68407	No
GRIK2	0.945643	1.05748	2.15655	2.26649	6.85658	6.62821	No
GTSE1	0.940248	1.06355	0.477229	0.465261	0.369376	0.353701	No
HEY1	1.0035	0.996516	0.190063	0.177896	0.194389	0.227904	No
HMGA2	0.956297	1.0457	0.405915	0.467085	0.460841	0.394297	No
HMGB2	0.978434	1.02204	0.495059	0.466083	0.357595	0.488434	No
HMMR	0.980239	1.02016	0.436177	0.366857	0.224493	0.228441	No
HPGD	1.01629	0.983967	4.28247	4.15801	3.64031	4.00167	No
HPRT1	0.910053	1.09884	0.388272	0.45256	0.300583	0.328212	No
HTR2B	1.00077	0.999226	1.92079	2.28034	2.24827	2.56462	No
IFI27L2	1.09162	0.916071	3.23374	3.02919	1.88574	1.68065	No
IGFBP3	0.934855	1.06968	0.388065	0.428146	0.664921	0.682801	No
IL16	0.962937	1.03849	2.33349	1.91004	1.22536	1.21839	No
ING4	1.04183	0.959849	2.21001	2.18946	2.64762	2.84378	No
INHBA	0.918233	1.08905	0.223953	0.18543	0.369907	0.37115	No
INPP5F	0.943609	1.05976	0.282846	0.303001	0.424288	0.412588	No
ITGA3	1.00704	0.99301	0.455201	0.400731	0.823289	0.740961	No
ITGB3	0.974534	1.02613	0.381333	0.425401	0.74863	0.78438	No
ITPR1	0.988389	1.01175	0.325277	0.36493	0.309172	0.318681	No
KCNN4	0.984548	1.01569	0.209154	0.258196	0.333649	0.323303	No
KIAA0101	0.929711	1.0756	0.37771	0.377824	0.225621	0.265544	No
KIF11	0.932434	1.07246	0.426478	0.416081	0.210466	0.272227	No
KIF23	0.973436	1.02729	0.387205	0.422164	0.247573	0.310917	No
KIF2C	0.976008	1.02458	0.423404	0.396168	0.254525	0.310975	No
KLF11	0.98293	1.01737	1.98362	2.05814	2.49438	2.54599	No
LCP1	0.935629	1.0688	0.334235	0.292533	0.243816	0.251936	No
LEF1	1.02672	0.973974	0.407032	0.373965	0.231256	0.234026	No
LIF	0.92967	1.07565	0.155312	0.144376	0.284476	0.292894	No
LIMD2	1.04418	0.957691	2.56702	2.2924	1.94754	1.58953	No
LMNB1	0.894262	1.11824	0.312073	0.364179	0.202653	0.184384	No
LONRF3	0.959454	1.04226	0.253398	0.309168	0.241592	0.237742	No
LRP8	1.04007	0.961477	0.379528	0.405606	0.334988	0.35747	No
LYAR	0.927181	1.07854	0.307809	0.304635	0.19852	0.228389	No
MAF	0.942535	1.06097	2.73292	1.97318	5.92278	6.20503	No
MCC	0.92974	1.07557	2.92964	3.00029	2.69553	2.81829	No
MCM3	0.978155	1.02233	0.449905	0.469376	0.350064	0.37824	No
MCM4	0.974173	1.02651	0.465241	0.46297	0.190196	0.194893	No
MCM5	0.995458	1.00456	0.453775	0.43391	0.245911	0.232754	No
MCM7	0.986229	1.01396	0.489366	0.489067	0.333098	0.324748	No
MCTP1	0.875992	1.14156	0.418757	0.48179	0.185993	0.275031	No
MELK	0.893437	1.11927	0.451475	0.491481	0.276073	0.352753	No
MFSD2A	0.926554	1.07927	0.338718	0.262719	0.334496	0.299561	No
MGST1	0.988638	1.01149	0.494648	0.41299	0.2059	0.215812	No
MLF1IP	0.927612	1.07804	0.470715	0.477803	0.286035	0.378934	No
MMP1	0.976819	1.02373	0.356251	0.323345	0.299588	0.324357	No
MMP2	1.00213	0.997875	2.59317	2.48317	2.49449	2.40777	No
MPHOSPH6	0.903185	1.10719	0.482166	0.48494	0.322196	0.301188	No
MTMR10	1.02965	0.971201	2.52786	2.40809	1.32168	1.39084	No
MXD4	1.05769	0.945455	2.56718	2.3013	2.77327	2.49233	No
MYBL2	1.07775	0.927861	0.416011	0.405859	0.223835	0.227634	No
NCAPG	0.929128	1.07628	0.401505	0.440627	0.213166	0.242253	No
NCAPG2	0.999659	1.00034	0.398107	0.384358	0.211759	0.260618	No
NCAPH	0.996283	1.00373	0.384569	0.372125	0.215105	0.264368	No
NDRG1	0.982824	1.01748	0.366229	0.357666	0.39548	0.385835	No
NEDD4L	0.937356	1.06683	0.501092	0.446056	0.203479	0.227184	No
NES	0.989531	1.01058	0.361894	0.358586	0.407746	0.349357	No
NET1	0.924688	1.08145	0.386653	0.417234	0.43314	0.41665	No
NFATC2	0.976846	1.0237	2.90949	3.0142	5.26969	5.05306	No
NOV	0.995187	1.00484	2.8028	2.465	2.2759	2.24308	No
NUP50	0.961636	1.03989	0.335948	0.326257	0.292375	0.399774	No
OPTN	0.979726	1.02069	2.54187	2.36778	2.45194	2.85029	No
PAPSS2	0.962033	1.03947	0.310668	0.270581	0.2966	0.406889	No
PAQR5	0.924216	1.082	0.36386	0.398094	0.205547	0.237047	No
PBK	0.906095	1.10364	0.429255	0.447128	0.185725	0.220295	No
PDK2	0.980729	1.01965	2.18528	1.85164	2.19775	2.13079	No
PEG10	1.0132	0.986975	0.437897	0.398316	0.438374	0.420858	No
PFKFB4	1.04578	0.956224	0.341758	0.311625	0.366345	0.326688	No
PGCP	1.00467	0.995356	2.28691	2.18921	1.92394	2.00437	No
PHLDA2	0.91531	1.09253	0.215004	0.246996	0.232351	0.215807	No
PKNOX2	1.02338	0.977152	2.27055	2.13088	1.15438	1.08896	No
PLIN2	0.941766	1.06183	0.471252	0.477366	0.428316	0.495782	No
PLK1	0.982095	1.01823	0.492531	0.432708	0.3022	0.291043	No
PLK4	0.950728	1.05183	0.321907	0.319323	0.159613	0.197288	No
PLXNB1	0.973094	1.02765	3.32241	3.27316	3.79007	3.60974	No
PNP	0.995754	1.00426	0.186885	0.196953	0.117261	0.116484	No
POLE	1.02079	0.979634	0.486266	0.458171	0.309197	0.331028	No
PRKG1	0.930882	1.07425	2.22541	2.4333	1.92622	2.12513	No
PVR	0.973613	1.0271	0.499104	0.499754	0.44111	0.420066	No
RAD51	0.920995	1.08578	0.431181	0.37626	0.157431	0.19731	No
RAD54L	0.974432	1.02624	0.390718	0.400735	0.266421	0.272469	No
RDH5	0.970601	1.03029	0.528522	0.444592	0.47682	0.3818	No
RFC3	0.931922	1.07305	0.372579	0.38486	0.318881	0.404024	No
RFC4	0.995318	1.0047	0.513815	0.482851	0.299359	0.320307	No
RND3	0.950208	1.0524	0.256231	0.251683	0.420293	0.468443	No
RNF157	1.06807	0.936265	0.522594	0.4676	0.33935	0.310765	No
RNF182	0.957834	1.04402	0.453464	0.491043	0.523889	0.581314	No
RPS6KA3	0.978542	1.02193	0.468797	0.472376	0.802679	0.857421	No
RRM2	0.88911	1.12472	0.421075	0.425631	0.116519	0.16058	No
S100A16	0.982867	1.01743	0.345282	0.261653	0.474732	0.461984	No
SCPEP1	0.972612	1.02816	2.04892	2.04448	1.95884	2.15917	No
SDC3	1.01371	0.986473	0.249999	0.230538	0.459928	0.436283	No
SEC14L1	0.941537	1.06209	2.58447	2.43078	1.38262	1.49475	No
SEH1L	0.949651	1.05302	0.409319	0.44133	0.2543	0.295565	No
SELENBP1	1.00276	0.997244	2.91245	2.50681	1.71236	1.72927	No
SERPIND1	0.853083	1.17222	0.247625	0.179096	0.289663	0.217793	No
SESN3	1.01499	0.985228	3.8776	4.06881	5.83878	5.75388	No
SGOL1	0.923253	1.08313	0.420959	0.394951	0.22602	0.270267	No
SH2B3	0.98186	1.01848	0.204645	0.194082	0.20785	0.194843	No
SHC4	0.961885	1.03962	2.16539	2.21797	3.01009	3.22524	No
SHCBP1	0.976141	1.02444	0.417921	0.440669	0.202393	0.264015	No
SHISA2	0.782358	1.27819	0.196482	0.174513	0.214274	0.187132	No
SKA1	0.927948	1.07765	0.442058	0.381951	0.204406	0.238403	No
SKA3	0.941316	1.06234	0.384658	0.42749	0.167949	0.211846	No
SLC16A6	0.935886	1.06851	0.306735	0.367618	0.160734	0.171323	No
SLC1A4	0.993273	1.00677	3.17373	3.03549	3.10616	2.94433	No
SLC20A1	0.977809	1.02269	0.335059	0.388375	0.350859	0.368171	No
SLC27A3	1.01361	0.98657	0.185395	0.165593	0.0954752	0.0752712	No
SLC2A1	0.94729	1.05564	0.321813	0.315055	0.36023	0.393136	No
SLC2A3	0.963734	1.03763	0.311593	0.363508	0.467232	0.551297	No
SLC43A3	0.970866	1.03001	0.46643	0.401878	0.317179	0.316236	No
SLC7A11	0.917093	1.0904	0.312821	0.326823	0.245643	0.35285	No
SMAGP	0.941082	1.06261	0.425415	0.419405	0.350598	0.382767	No
SMC4	0.960747	1.04086	0.461442	0.471949	0.352283	0.39388	No
SNAI2	0.97158	1.02925	3.03491	2.62145	1.8867	1.95249	No
SNN	0.987222	1.01294	2.23574	2.32632	2.60923	2.75507	No
SNX10	0.952542	1.04982	0.494302	0.447175	0.351232	0.368615	No
SOX4	1.07678	0.928693	2.44987	2.50776	2.90488	2.80432	No
SPAG5	0.982803	1.0175	0.407063	0.388603	0.264378	0.290798	No
SPRY4	0.933337	1.07142	0.0465307	0.0417618	0.0464371	0.051714	No
STK32B	0.969001	1.03199	0.365212	0.358187	0.562213	0.557754	No
STX7	1.01129	0.988835	2.11427	1.99149	1.21217	1.28182	No
SUV39H1	0.977994	1.0225	0.488987	0.464582	0.34464	0.40278	No
SYNJ2	0.978397	1.02208	0.461743	0.478823	0.424503	0.383447	No
TACC3	0.988706	1.01142	0.467006	0.424259	0.278444	0.318509	No
TFRC	0.942197	1.06135	0.407952	0.390795	0.192358	0.23924	No
TJP2	0.926814	1.07896	1.89745	2.12959	1.29646	1.22001	No
TLCD1	0.985789	1.01442	0.399002	0.387831	0.440438	0.40751	No
TM4SF1	0.98184	1.0185	0.135213	0.137434	0.128291	0.112971	No
TMEM140	0.986886	1.01329	3.05906	2.5146	7.35741	6.97304	No
TMOD1	1.03565	0.965577	2.89349	3.17409	2.9135	2.72001	No
TMOD2	0.816131	1.22529	3.02461	2.7045	5.6692	6.3605	No
TOP2A	0.95692	1.04502	0.488513	0.478782	0.401726	0.420304	No
TPCN2	1.03143	0.969528	2.2614	2.22353	1.90717	1.95146	No
TPD52	1.0215	0.978955	0.354163	0.3514	0.255242	0.25924	No
TRIP13	0.934816	1.06973	0.317315	0.340772	0.161857	0.18068	No
TTLL1	1.00186	0.998146	2.90628	2.6132	2.48771	2.43518	No
TTLL3	1.09731	0.911323	2.21511	1.94548	2.29034	2.30043	No
TTYH2	0.979821	1.02059	2.22666	1.93481	1.19255	1.11988	No
TUBA1A	0.975934	1.02466	2.44871	2.24053	2.46809	2.36276	No
UBE2T	1.0254	0.97523	0.476547	0.455126	0.273356	0.292453	No
UCN2	0.981952	1.01838	0.138535	0.142314	0.276174	0.255861	No
VDR	0.924479	1.08169	0.472423	0.464062	0.228241	0.244913	No
VGF	1.03017	0.970715	0.415003	0.375319	0.72069	0.646141	No
WDR76	0.967286	1.03382	0.369765	0.360677	0.166409	0.182991	No
WEE1	0.963716	1.03765	0.382138	0.382554	0.299973	0.326057	No
ZFYVE1	1.05142	0.951092	2.22966	2.12722	2.16876	2.01445	No
ZMAT3	0.927045	1.0787	2.1391	2.15794	2.26281	2.35836	No
ZWINT	0.921623	1.08504	0.469365	0.502225	0.287816	0.295666	No
ANGPTL7	1.02713	0.973585	13.5466	14.486	76.1044	77.304	No
RFTN2	0.980203	1.0202	9.73158	9.28899	17.5842	18.0461	No
ASPA	1.01013	0.989975	8.97244	8.74459	10.0479	11.7888	No
PRELP	1.0681	0.936242	6.70631	6.04794	8.86802	8.87336	No
MATN2	0.945439	1.05771	4.93648	5.42583	24.3379	25.5837	No
JUN	1.04894	0.953346	4.61075	5.16858	18.5269	19.7027	No
PCDHB15	0.942606	1.06089	4.28053	4.71968	8.34248	9.14318	No
OLFML2B	0.978235	1.02225	4.14005	4.47147	9.29822	10.2939	No
CMTM5	1.07777	0.927841	4.42122	3.94643	14.0957	14.8115	No
FSTL5	0.993412	1.00663	3.93573	3.98846	9.56249	9.8585	No
TP53INP2	1.02921	0.97162	4.08003	3.80862	3.60518	3.76106	No
SECTM1	0.992976	1.00707	4.10634	3.73863	2.11066	2.21454	No
P2RX7	0.964891	1.03639	3.90976	3.76349	4.99412	4.92151	No
KLF13	0.943788	1.05956	3.93641	3.71897	2.87076	2.89194	No
CERS4	1.00985	0.990251	3.91043	3.29465	2.99698	2.75823	No
PIK3R3	0.887769	1.12642	3.64417	3.44479	2.43906	2.88823	No
SCRG1	0.849784	1.17677	3.52806	3.32167	16.5175	16.151	No
CCDC92	0.90088	1.11003	3.49595	3.22518	4.47115	5.11458	No
TCN1	0.952724	1.04962	3.33331	3.33905	17.3946	18.8283	No
RNF122	1.04514	0.956809	3.30835	3.35514	1.68315	1.7425	No
RNF144B	0.967961	1.0331	3.39956	3.20724	2.38343	2.42981	No
RAB30	0.946359	1.05668	3.28398	3.1972	2.04765	2.47696	No
ARHGAP31	1.02991	0.970958	3.2686	3.14522	3.67877	3.73066	No
TGFBR2	0.996911	1.0031	3.42409	2.94385	4.1452	4.03255	No
FGFBP2	0.914618	1.09335	3.21115	3.09031	9.21689	8.86917	No
CDH7	0.940419	1.06336	3.33706	2.95558	1.48417	1.71871	No
LSAMP	0.98171	1.01863	3.22733	3.01234	5.18978	5.19536	No
CNTN1	0.917688	1.08969	3.31846	2.9273	1.65387	1.89837	No
ZNF536	1.03897	0.962496	3.05199	3.16648	9.62991	9.94979	No
C12orf76	0.892991	1.11983	3.1852	3.01039	3.11435	3.63892	No
FMO4	0.931866	1.07312	3.39947	2.80335	3.00678	3.67649	No
MR1	0.920889	1.08591	3.0738	3.07608	5.00511	5.25886	No
MGP	0.947021	1.05594	3.28079	2.87067	4.14749	3.90246	No
DUSP22	0.98398	1.01628	3.04721	3.02807	2.13678	2.18448	No
KCNS3	0.91454	1.09345	2.80498	3.15987	10.5232	11.0654	No
RUNDC3A	1.01956	0.980811	3.00996	2.89879	3.94624	4.32641	No
STAT2	1.05508	0.947798	3.14419	2.65652	4.18205	3.79859	No
NIPAL2	0.91299	1.0953	2.93745	2.78156	1.9381	2.22599	No
C1S	0.984425	1.01582	2.93255	2.72682	2.06689	2.21888	No
KIAA1370	0.906009	1.10374	2.808	2.80497	2.35776	2.54492	No
MDGA2	1.0436	0.958225	2.8542	2.66279	1.55492	2.17832	No
TMEM86A	1.00021	0.999788	2.7982	2.70015	3.37851	4.20823	No
PCDHB14	0.951384	1.0511	2.5949	2.82271	6.22851	6.98451	No
PCDHB10	1.00603	0.994002	2.79989	2.60515	3.03063	4.03725	No
TMEM117	0.975952	1.02464	2.76749	2.58588	1.98291	2.11657	No
KLHL24	0.945073	1.05812	2.70552	2.61958	3.50178	3.87162	No
C5orf13	0.972969	1.02778	2.76217	2.52218	5.00581	5.18625	No
TCP11L2	0.908742	1.10042	2.74888	2.50077	3.72117	4.21573	No
PCDHB11	0.927019	1.07873	2.66556	2.5784	5.39985	5.80099	No
ATG14	1.00769	0.992364	2.47109	2.77283	2.28943	2.53912	No
RTP4	0.961622	1.03991	3.05894	2.23713	7.61461	6.55745	No
TMTC2	0.99098	1.0091	2.49993	2.71337	4.16132	4.07233	No
COL11A2	1.01925	0.981118	2.81022	2.40703	2.24503	2.23713	No
ARHGEF3	0.964854	1.03643	2.57142	2.57631	2.28309	2.53096	No
ST6GALNAC2	1.06034	0.943095	2.73182	2.42354	2.50017	2.5775	No
MAP3K3	1.02133	0.979116	2.56946	2.57592	1.98745	1.88378	No
EPAS1	1.00296	0.997046	2.77705	2.37791	2.52883	2.59609	No
ZNF608	0.970337	1.03057	2.55003	2.57856	3.86775	4.14	No
OVOS	0.981143	1.01922	2.53537	2.59249	2.90392	3.48863	No
NAV1	1.05838	0.944843	2.55503	2.56332	2.04779	1.96024	No
ID2	0.837616	1.19386	2.74821	2.37588	2.38813	2.46752	No
OLFML2A	1.00589	0.994143	2.41407	2.67923	5.72772	5.78718	No
DDX60L	1.02462	0.975975	2.76547	2.28022	3.83639	3.39968	No
ROBO2	0.94151	1.06212	2.49943	2.515	2.27593	2.75789	No
SAMD9L	1.01903	0.981322	2.88018	2.13746	4.67337	3.75912	No
PLA2G6	0.944066	1.05925	2.67649	2.29566	3.58179	3.06206	No
IRAK4	0.913601	1.09457	2.54605	2.39479	2.45737	2.97274	No
LBH	0.9772	1.02333	2.50821	2.43089	4.58984	4.51723	No
PKI55	0.916487	1.09112	2.73205	2.19642	1.41416	1.34489	No
EHD4	1.00873	0.991348	2.56016	2.33096	2.66541	2.81298	No
C8orf46	1.04088	0.960728	2.34525	2.53823	1.60964	1.79461	No
FAM129A	0.965119	1.03614	2.37425	2.50717	5.39501	5.2778	No
ENOX1	0.945811	1.05729	2.46969	2.36723	2.81998	2.76585	No
PRSS23	0.956552	1.04542	2.51443	2.32243	4.06032	4.3051	No
SPOCK1	0.937388	1.06679	2.53287	2.30328	4.13346	4.92185	No
MPZ	0.998392	1.00161	2.53741	2.28695	11.7858	11.2187	No
CDKL5	0.900255	1.1108	2.44305	2.3635	2.0567	2.12441	No
WISP2	1.07515	0.9301	2.36193	2.43441	2.4574	2.54442	No
PPP2R5B	1.00243	0.997576	2.45917	2.33743	2.50829	2.29351	No
ZNF528	0.78474	1.27431	2.39612	2.39347	1.66201	2.0595	No
ATG2A	0.998575	1.00143	2.48691	2.28361	1.31234	1.45757	No
C9orf93	0.949918	1.05272	2.35948	2.36912	1.13707	1.32896	No
SMPD1	0.987356	1.01281	2.58682	2.15117	2.68184	2.50964	No
RNASEL	0.85139	1.17455	2.40772	2.28438	2.01915	1.86901	No
MEIS1	0.935215	1.06927	2.39703	2.28788	1.69852	1.98506	No
KIAA1211	1.01738	0.982915	2.43078	2.23541	1.7809	1.62766	No
USP35	0.948785	1.05398	2.49011	2.11233	1.53196	1.55406	No
AGPHD1	0.947821	1.05505	2.32776	2.25552	2.35863	2.78407	No
GJA3	0.979813	1.0206	2.29626	2.28472	2.32524	2.41929	No
C20orf194	0.993958	1.00608	2.3055	2.26727	1.68587	1.7391	No
RNF144A	0.962652	1.0388	2.38063	2.19406	1.9894	1.91123	No
ALDH6A1	1.00458	0.995442	2.35261	2.21777	3.56437	3.4552	No
ABCC2	0.936784	1.06748	2.34757	2.1658	1.10722	1.17926	No
ETNK2	0.955816	1.04623	2.41685	2.09751	1.98549	2.15437	No
CCDC146	0.923158	1.08324	2.19313	2.30212	23.545	24.4095	No
FAM189A2	0.973259	1.02748	2.26072	2.21707	1.71562	1.71841	No
CDC42EP4	1.05792	0.945251	2.4303	2.06113	1.49947	1.28531	No
HBP1	0.962159	1.03933	2.30207	2.15434	2.85445	2.806	No
AMOTL2	1.0264	0.974275	2.01628	2.39068	4.49784	4.41853	No
GSTA4	0.954895	1.04724	2.38775	2.01078	1.77156	1.9234	No
AHCYL2	0.978932	1.02152	2.27099	2.11258	2.41818	2.53639	No
GAB1	1.02902	0.971798	2.34921	2.03821	2.27455	2.00556	No
CCDC159	0.860206	1.16251	2.31669	2.0605	2.59443	3.01092	No
TRAPPC6A	1.0723	0.932578	2.35862	2.01379	2.03915	2.0489	No
LIMD1	0.981915	1.01842	2.05047	2.30861	3.1112	2.95611	No
C12orf60	0.924145	1.08208	2.09021	2.25456	3.63267	3.51487	No
C10orf11	1.04526	0.956697	2.38778	1.96058	1.52212	1.48349	No
C6orf225	0.879788	1.13664	2.24356	2.07416	2.53281	2.41345	No
SLC25A45	0.954219	1.04798	2.26186	2.05306	2.03561	2.12318	No
AKAP6	0.983297	1.01699	2.12531	2.18458	2.85198	2.92333	No
L3MBTL1	0.974527	1.02614	2.31514	2.00517	1.10034	1.25783	No
TSPAN15	0.972377	1.02841	2.25714	2.05432	2.52495	2.60756	No
RGL1	0.921423	1.08528	2.10443	2.15666	1.53346	1.69629	No
CD33	0.922352	1.08419	2.34126	1.9368	1.09669	1.18317	No
PCDHB9	1.0086	0.991475	2.29462	1.9714	2.38397	2.79444	No
FHIT	0.907581	1.10183	2.30491	1.95182	1.77861	1.57766	No
SAMD9	1.05744	0.945679	2.37423	1.89021	4.96011	4.16632	No
XYLT1	1.06949	0.935026	1.99691	2.23972	3.03124	3.03541	No
DYNC1I1	0.970304	1.03061	2.00376	2.21017	1.62988	1.42595	No
C19orf28	1.0033	0.996713	2.16995	2.02975	1.55226	1.50249	No
C9orf150	0.986437	1.01375	1.98569	2.21323	2.16637	2.67213	No
ARSD	1.01526	0.984974	2.1732	2.01668	2.57661	2.48019	No
PMP2	0.941186	1.06249	2.06402	2.1188	3.29998	3.33943	No
VANGL2	1.01945	0.980919	2.18677	1.99559	1.7552	1.49914	No
KRCC1	0.942411	1.06111	2.10804	2.06741	2.30975	2.98657	No
PRKCE	0.970177	1.03074	2.13681	2.0334	1.41956	1.38179	No
ERVFRD-1	0.990138	1.00996	2.15869	2.00323	1.31392	1.23932	No
VPS41	0.928876	1.07657	2.02662	2.13371	1.70764	1.72662	No
RARB	0.937778	1.06635	2.08299	2.0747	2.65679	2.6595	No
BDH2	0.881836	1.134	2.20067	1.95913	1.77226	2.25396	No
HMGCL	0.991347	1.00873	2.21894	1.9291	1.81557	1.87035	No
DNAJB5	1.12155	0.891626	2.08249	2.05013	3.40136	3.28836	No
FOXD3	1.11938	0.893353	2.18284	1.94829	9.50193	8.82777	No
NRBP2	1.09477	0.913437	2.20318	1.9253	2.07725	1.9009	No
TP53I3	0.949318	1.05339	2.1351	1.97739	3.10364	3.13432	No
GEMIN8	0.975232	1.0254	2.1531	1.96083	1.98104	2.04879	No
NLGN1	0.952842	1.04949	2.08927	2.01525	2.67384	2.71602	No
PBXIP1	0.941769	1.06183	2.0055	2.09811	3.46776	3.31569	No
PTPN21	1.02338	0.977159	2.05869	2.03205	2.41161	2.3813	No
SIDT2	1.01451	0.985697	2.12867	1.96508	2.60083	2.45105	No
C1R	1.0048	0.995225	2.14442	1.94341	2.00088	1.83654	No
RCBTB2	0.93741	1.06677	2.0183	2.05839	2.89392	3.47761	No
TCN2	0.922994	1.08343	2.06052	2.00648	1.30657	1.37086	No
LINC00310	0.97342	1.02731	2.11873	1.92544	1.52432	2.04356	No
THNSL2	1.00611	0.993931	1.99235	2.02099	2.43741	2.30564	No
GTF2IRD2	0.932005	1.07296	2.03247	1.9709	2.75385	3.78018	No
PGAM1	0.965979	1.03522	0.511167	0.489848	0.30731	0.32626	No
SLFN11	0.92391	1.08236	0.483501	0.515901	0.575354	0.707271	No
CHORDC1	0.774182	1.29169	0.460518	0.541589	0.452591	0.563699	No
MPP6	0.94073	1.063	0.504464	0.493468	0.300121	0.343254	No
KHK	0.965104	1.03616	0.500721	0.494592	0.519553	0.597223	No
USP1	0.974852	1.0258	0.47934	0.516165	0.498815	0.559305	No
SIX1	0.950578	1.05199	0.529142	0.46751	0.326033	0.312979	No
CEP78	0.90199	1.10866	0.503921	0.489501	0.257475	0.330075	No
C1orf115	1.00997	0.990127	0.505535	0.485558	0.406199	0.328724	No
C18orf55	0.919722	1.08728	0.510872	0.480195	0.334313	0.366482	No
SNORD28	0.913193	1.09506	0.546463	0.447052	0.379483	0.425135	No
CITED4	0.925387	1.08063	0.548276	0.445003	0.589071	0.657114	No
CDCA4	0.952754	1.04959	0.495257	0.491913	0.342425	0.327023	No
SNORD42B	0.916634	1.09095	0.578388	0.420274	0.325431	0.400902	No
JAG1	0.962157	1.03933	0.46482	0.521467	0.640065	0.702756	No
KNTC1	0.924558	1.0816	0.479721	0.503774	0.321289	0.370191	No
BAG2	0.920492	1.08638	0.505634	0.477497	0.366719	0.398084	No
ACTBL2	0.805268	1.24182	0.548795	0.43975	0.338927	0.423172	No
SSX2IP	0.904039	1.10615	0.482062	0.498086	0.874275	1.00323	No
C5orf34	0.92195	1.08466	0.504281	0.475297	0.291046	0.394247	No
MIS18BP1	1.05523	0.947658	0.512233	0.466665	0.31535	0.423982	No
RANBP1	0.956953	1.04498	0.506161	0.472096	0.273712	0.278456	No
CKAP2L	0.985433	1.01478	0.506723	0.468573	0.368091	0.438701	No
LMCD1	0.983584	1.01669	0.498683	0.475174	0.626543	0.674029	No
ESPL1	0.976298	1.02428	0.48236	0.487722	0.222303	0.243907	No
OGFRL1	0.936397	1.06792	0.478088	0.490063	0.416113	0.473587	No
URB2	1.02282	0.977689	0.474607	0.492937	0.383209	0.439883	No
CHAF1A	1.00036	0.99964	0.488231	0.477595	0.386628	0.418217	No
FANCM	0.961943	1.03956	0.45968	0.503301	0.371208	0.451731	No
SLC35F2	0.928309	1.07723	0.482068	0.478567	0.307706	0.375404	No
SNORD4B	0.9687	1.03231	0.474975	0.485648	0.486186	0.49734	No
NEFL	0.963082	1.03833	0.494298	0.466109	0.347747	0.315889	No
SGOL2	0.977032	1.02351	0.497624	0.461741	0.351193	0.385242	No
PHF17	0.951711	1.05074	0.454901	0.504074	0.521935	0.613006	No
E2F7	0.922472	1.08404	0.489277	0.468253	0.420203	0.465879	No
SLC25A15	0.979781	1.02064	0.475489	0.480397	0.148032	0.185539	No
MYBL1	0.950345	1.05225	0.48222	0.473116	0.656611	0.74808	No
NCAPD3	0.948555	1.05424	0.469576	0.482053	0.335798	0.366247	No
KIF18B	0.977806	1.0227	0.488394	0.462594	0.310108	0.34603	No
PUS7	0.940555	1.0632	0.48745	0.462331	0.295394	0.348521	No
ASPM	0.974331	1.02635	0.47105	0.478416	0.40179	0.490175	No
RBBP8	0.908135	1.10116	0.485696	0.463532	0.332647	0.357509	No
PPAT	0.891658	1.12151	0.473671	0.474815	0.231294	0.239643	No
TFPI	0.917534	1.08988	0.452344	0.496674	0.802391	0.917532	No
P2RX5	0.997452	1.00255	0.473246	0.473901	0.248748	0.273888	No
SEMA3F	1.03351	0.967581	0.507938	0.441354	0.479546	0.443169	No
GPD2	0.916823	1.09072	0.440175	0.506449	0.380764	0.430311	No
EYA4	0.976155	1.02443	0.475976	0.466333	0.260882	0.293844	No
PM20D2	0.917797	1.08957	0.471824	0.470116	0.345682	0.449379	No
FANCB	0.944262	1.05903	0.481002	0.457722	0.455285	0.475106	No
HIST1H2BB	1.01448	0.985723	0.498296	0.440428	0.164383	0.186027	No
BAAT	0.881046	1.13502	0.485321	0.448235	0.151972	0.161062	No
SLC25A37	0.936606	1.06768	0.460079	0.472541	0.494566	0.47615	No
AMACR	0.963177	1.03823	0.469391	0.462032	0.338328	0.390435	No
FIGNL1	0.882633	1.13297	0.481114	0.44897	0.22702	0.293861	No
LIN9	0.957307	1.0446	0.470207	0.457461	0.299145	0.366962	No
MCM8	0.95481	1.04733	0.463128	0.457827	0.343885	0.361785	No
LGALSL	0.946409	1.05663	0.462325	0.458198	0.53925	0.593931	No
KIF4A	0.92466	1.08148	0.453904	0.466406	0.266293	0.301286	No
GINS1	0.959337	1.04239	0.47879	0.441436	0.21832	0.254211	No
CLDN1	1.0057	0.994332	0.456637	0.462344	0.596209	0.708593	No
C18orf19	0.955521	1.04655	0.47212	0.445998	0.200449	0.268907	No
SLC7A1	0.999107	1.00089	0.459593	0.4577	0.21313	0.225664	No
C3orf26	0.946855	1.05613	0.451278	0.464412	0.45682	0.443569	No
SLC19A3	1.08425	0.9223	0.435827	0.480086	0.303311	0.42893	No
EFNA3	1.03092	0.970012	0.498785	0.418853	0.366151	0.447365	No
ZNF814	0.829493	1.20556	0.428963	0.485467	0.22059	0.39514	No
HIST1H3J	1.01797	0.982345	0.43187	0.481653	0.308928	0.318319	No
DLX1	0.96391	1.03744	0.446602	0.464773	0.611941	0.698012	No
NUP35	0.917999	1.08933	0.449273	0.461762	0.296203	0.354622	No
CCDC125	0.939285	1.06464	0.449878	0.461048	0.57515	0.736528	No
NFKBIE	0.956762	1.04519	0.45939	0.449141	0.413976	0.393804	No
RNFT2	0.959465	1.04225	0.467717	0.440535	0.502272	0.552431	No
PIM2	0.953514	1.04875	0.464964	0.442132	0.485953	0.462982	No
NPAS2	0.996858	1.00315	0.469012	0.436945	0.394407	0.355288	No
TMEM48	0.977598	1.02292	0.468461	0.436726	0.41852	0.453492	No
C7orf68	0.953666	1.04859	0.482554	0.421922	0.37656	0.360416	No
MIR622	0.902222	1.10837	0.456449	0.445638	0.533164	0.541457	No
DKC1	0.963394	1.038	0.456021	0.445329	0.233163	0.295732	No
UCK2	0.984457	1.01579	0.464672	0.436503	0.241835	0.270864	No
MND1	0.882853	1.13269	0.495401	0.409391	0.425181	0.523535	No
GEMIN4	0.957389	1.04451	0.486093	0.41639	0.34647	0.247943	No
NEIL3	0.924029	1.08222	0.440244	0.455107	0.253359	0.284371	No
MCM6	0.914025	1.09406	0.448486	0.446093	0.22288	0.259132	No
C4orf43	0.938091	1.06599	0.466422	0.428536	0.264486	0.372473	No
SPC25	0.9702	1.03072	0.459788	0.4299	0.192483	0.229245	No
ZNF215	0.888694	1.12525	0.4406	0.448471	0.184419	0.260444	No
CPNE5	1.05818	0.94502	0.425615	0.461939	0.348702	0.363179	No
CDCA7	0.955991	1.04603	0.47687	0.411801	0.149404	0.143702	No
C17orf53	0.977908	1.02259	0.460609	0.425122	0.352941	0.359824	No
PPARG	0.86699	1.15342	0.405226	0.480544	0.569544	0.519586	No
FREM1	1.02221	0.978277	0.437534	0.44461	0.796394	0.797564	No
SNRPD1	0.949856	1.05279	0.433495	0.447726	0.280049	0.403041	No
TIPIN	0.881335	1.13464	0.428864	0.452264	0.257954	0.247583	No
ECT2	0.944101	1.05921	0.464934	0.416758	0.376964	0.404918	No
MKI67	0.97299	1.02776	0.438631	0.441047	0.274243	0.310503	No
COTL1	0.98653	1.01365	0.438769	0.440555	0.449174	0.432176	No
PGF	0.959122	1.04262	0.404675	0.47585	0.688269	0.725941	No
EXOSC8	0.86673	1.15376	0.453827	0.423827	0.326345	0.410516	No
OIP5	0.884021	1.13119	0.399851	0.479474	0.333891	0.32187	No
CDKN2A	1.02461	0.975985	0.463816	0.413333	0.654505	0.679753	No
CD3EAP	1.00392	0.996097	0.441031	0.432631	0.481913	0.434159	No
FAM162A	0.981562	1.01878	0.466221	0.408372	0.26785	0.331439	No
MTBP	0.898503	1.11296	0.47176	0.402277	0.306285	0.410711	No
CDCA2	0.963979	1.03737	0.441806	0.429354	0.266677	0.309216	No
FKBP4	0.990754	1.00933	0.433457	0.436336	0.390321	0.366299	No
NTS	0.947568	1.05533	0.466167	0.404067	0.879383	0.799156	No
SFXN2	0.956348	1.04564	0.449999	0.417712	0.352847	0.343121	No
GINS4	0.880699	1.13546	0.426984	0.439312	0.269808	0.312641	No
PRIM1	1.02155	0.978901	0.452847	0.411678	0.2578	0.278883	No
AMD1	0.919075	1.08805	0.429159	0.432432	0.309583	0.390852	No
SMC2	0.955659	1.0464	0.418921	0.441677	0.290648	0.306227	No
KIAA0020	0.907001	1.10254	0.402732	0.455247	0.473005	0.470447	No
POLA1	0.926965	1.07879	0.413045	0.443043	0.465824	0.483327	No
HJURP	0.959251	1.04248	0.437778	0.417352	0.226656	0.275025	No
CCDC109B	0.963638	1.03773	0.4317	0.420031	0.244879	0.302381	No
BNIP3	0.974849	1.0258	0.439268	0.411449	0.354041	0.37578	No
CENPJ	0.941639	1.06198	0.382873	0.470402	0.357758	0.449443	No
FAM54A	0.935118	1.06938	0.419177	0.4272	0.203756	0.201596	No
SACS	0.943314	1.06009	0.408567	0.437994	0.527178	0.781071	No
MTHFD2	0.923223	1.08316	0.422935	0.419974	0.206754	0.312847	No
FANCD2	0.959553	1.04215	0.405009	0.43594	0.240357	0.258991	No
ELOVL2	0.985505	1.01471	0.439078	0.401003	0.209963	0.227765	No
NDC80	0.884991	1.12996	0.424768	0.414471	0.263074	0.274005	No
CTPS	0.972609	1.02816	0.395288	0.445255	0.266348	0.274017	No
BRCA2	0.950835	1.05171	0.424724	0.410498	0.264343	0.269849	No
SNORD78	1.00632	0.993718	0.500526	0.340444	0.216459	0.297317	No
NOC3L	0.911788	1.09675	0.421853	0.402251	0.21612	0.28272	No
GSG2	0.958276	1.04354	0.407751	0.410533	0.221367	0.313364	No
SASS6	0.938823	1.06516	0.434815	0.383977	0.271843	0.326113	No
SFXN1	0.953456	1.04882	0.439681	0.376922	0.273249	0.308774	No
SNORD22	1.01416	0.986039	0.450354	0.367086	0.266716	0.265048	No
ORC6	0.883864	1.1314	0.399311	0.411816	0.221578	0.267547	No
DNER	0.926388	1.07946	0.39093	0.418469	0.398868	0.420053	No
CHRNA5	0.961456	1.04009	0.397916	0.407891	0.204102	0.249808	No
FBXO5	0.909943	1.09897	0.378786	0.425876	0.225221	0.280656	No
STIL	0.960516	1.04111	0.414565	0.38789	0.180069	0.212809	No
MMS22L	0.939803	1.06405	0.403548	0.397726	0.274989	0.306416	No
SNORD27	0.926486	1.07935	0.46881	0.34097	0.233507	0.253987	No
LANCL3	0.941261	1.0624	0.414209	0.385291	0.158959	0.167478	No
C12orf48	0.856581	1.16743	0.410313	0.388838	0.263983	0.364352	No
EXOC6	0.976645	1.02391	0.408388	0.387746	0.327798	0.318678	No
KIAA1524	0.974411	1.02626	0.412073	0.383733	0.224484	0.274769	No
ATAD5	0.987248	1.01292	0.394706	0.398361	0.211594	0.261186	No
NOLC1	1.00211	0.997893	0.41926	0.37146	0.301108	0.345017	No
HIST1H1B	0.858263	1.16514	0.408486	0.369531	0.173424	0.171884	No
MAMDC2	0.925952	1.07997	0.385354	0.39169	0.314073	0.359666	No
SGMS2	0.904565	1.1055	0.412198	0.364948	0.450769	0.515613	No
RLBP1	0.929004	1.07642	0.400582	0.374516	0.230436	0.256079	No
PTTG1	1.02181	0.97866	0.387893	0.385352	0.239385	0.269404	No
SPC24	0.972689	1.02808	0.415233	0.358975	0.233089	0.22347	No
PLCB4	0.914711	1.09324	0.408804	0.364331	0.219561	0.223118	No
CRIM1	0.984097	1.01616	0.376147	0.390749	0.500536	0.531444	No
RAD51AP1	0.966136	1.03505	0.379974	0.38033	0.176929	0.174342	No
CA9	1.04671	0.955378	0.411683	0.350737	0.42911	0.53195	No
TTK	0.937946	1.06616	0.402471	0.355753	0.198651	0.266399	No
B3GNT7	0.920976	1.0858	0.399481	0.357382	0.400773	0.366779	No
MAD2L1	0.951283	1.05121	0.361482	0.393708	0.170373	0.218662	No
PLEKHH2	0.975515	1.0251	0.406022	0.349009	0.319758	0.344047	No
NUF2	0.951032	1.05149	0.361535	0.385693	0.213026	0.290479	No
POLR3G	0.936632	1.06765	0.369206	0.375226	0.16955	0.214722	No
C12orf24	0.980156	1.02025	0.384956	0.359245	0.342954	0.365667	No
C1orf135	0.882319	1.13338	0.361276	0.382321	0.211002	0.2545	No
KIF18A	0.970634	1.03025	0.372116	0.366698	0.272368	0.271618	No
HEG1	0.983043	1.01725	0.391939	0.347698	0.730015	0.70276	No
UTS2D	0.922435	1.08409	0.371632	0.36203	0.175618	0.173162	No
SNORD26	0.939484	1.06441	0.378134	0.353416	0.237093	0.284261	No
FAM72D	0.933995	1.07067	0.374395	0.35347	0.291569	0.373476	No
HAUS6	0.978353	1.02213	0.41357	0.319098	0.293861	0.314069	No
SLCO5A1	0.956441	1.04554	0.343348	0.380279	0.298119	0.30014	No
CENPE	0.956374	1.04562	0.356749	0.355447	0.246049	0.274622	No
CDC6	0.939728	1.06414	0.354166	0.352474	0.0992045	0.103873	No
C15orf42	1.00829	0.991782	0.373102	0.331428	0.139845	0.141753	No
IL27RA	0.986079	1.01412	0.318743	0.379238	0.296232	0.322486	No
DDAH1	0.937424	1.06675	0.350542	0.344749	0.425351	0.493912	No
POLR1B	0.994019	1.00602	0.347367	0.347784	0.312225	0.347355	No
PDK1	0.993657	1.00638	0.361042	0.332477	0.175266	0.1687	No
ZEB1	0.970201	1.03071	0.344919	0.347978	0.347502	0.384805	No
BUB1B	0.933204	1.07158	0.350207	0.340882	0.191569	0.248796	No
POLQ	0.941835	1.06176	0.348986	0.339796	0.230349	0.239113	No
ST3GAL1	0.992201	1.00786	0.342212	0.344589	0.374934	0.358399	No
PDE3A	0.981491	1.01886	0.356597	0.326232	0.64071	0.656871	No
KIF15	0.87508	1.14275	0.344051	0.336246	0.201756	0.232113	No
CSGALNACT1	0.922114	1.08446	0.323919	0.34958	0.622648	0.701135	No
CDK14	0.966079	1.03511	0.330472	0.341624	0.577834	0.591322	No
BLM	0.97797	1.02253	0.317796	0.34829	0.133544	0.159088	No
SEMA3A	0.969092	1.03189	0.316802	0.344241	0.494746	0.541741	No
TESC	0.901581	1.10916	0.290607	0.369163	0.31931	0.203095	No
GATA3	0.930493	1.0747	0.363669	0.2864	0.338581	0.329504	No
CENPK	0.930071	1.07519	0.32131	0.317972	0.124473	0.184033	No
DNA2	0.967001	1.03413	0.327335	0.305893	0.171864	0.209428	No
KIF14	0.941057	1.06263	0.295301	0.326922	0.182837	0.216166	No
HSPA4L	0.952053	1.05036	0.316648	0.301218	0.208917	0.231422	No
MCM10	0.978595	1.02187	0.287656	0.330204	0.104783	0.122819	No
DSCC1	0.96469	1.0366	0.299495	0.312263	0.176817	0.165099	No
KIF20B	0.978213	1.02227	0.30271	0.300932	0.172506	0.227568	No
CSF2RA	0.917783	1.08958	0.270802	0.334516	0.209234	0.21466	No
ORC1	0.936703	1.06757	0.305411	0.287417	0.186786	0.167672	No
LRGUK	0.948911	1.05384	0.244131	0.350129	0.142749	0.190641	No
ABCG2	0.798743	1.25197	0.29027	0.288631	0.258403	0.265199	No
XRCC2	0.9409	1.06281	0.283808	0.291576	0.144467	0.194559	No
ZC3H13	1.01829	0.982039	0.278899	0.295212	0.331668	0.362604	No
STAMBPL1	0.946432	1.0566	0.297808	0.272902	0.267844	0.332983	No
E2F8	0.951288	1.05121	0.274129	0.292932	0.229763	0.241577	No
POLE2	0.906013	1.10374	0.280786	0.280372	0.0806144	0.109357	No
SLC25A19	0.96231	1.03917	0.282794	0.272377	0.19253	0.201597	No
LINC00277	0.969502	1.03146	0.264209	0.286441	0.284067	0.228887	No
CPA4	0.84625	1.18168	0.254848	0.288386	0.308338	0.347544	No
PMAIP1	0.904034	1.10615	0.283826	0.25715	0.160966	0.222545	No
FCER1G	0.961543	1.03999	0.303881	0.237842	0.20791	0.293729	No
SPRYD5	0.949906	1.05274	0.266782	0.259045	0.221466	0.249925	No
RGS2	0.896953	1.11489	0.250634	0.274657	0.399969	0.42358	No
C11orf82	0.929076	1.07634	0.246086	0.270017	0.119011	0.129261	No
HK2	1.01768	0.982626	0.246665	0.265663	0.180427	0.197599	No
LONRF2	1.01701	0.983278	0.255667	0.25271	0.324489	0.357036	No
HELLS	0.868211	1.15179	0.240424	0.264769	0.158077	0.179242	No
TFB1M	0.967577	1.03351	0.246465	0.228257	0.0995121	0.158035	No
TM4SF19	1.07707	0.928446	0.239218	0.231026	0.042722	0.0394514	No
SNAI1	0.995796	1.00422	0.250963	0.214528	0.436935	0.45976	No
TGM2	0.961384	1.04017	0.235966	0.226232	0.301889	0.312601	No
ARHGAP29	0.825358	1.2116	0.213005	0.244935	0.185329	0.161423	No
MGC14436	0.932756	1.07209	0.225396	0.213252	0.124736	0.144911	No
SPRY1	0.992828	1.00722	0.212924	0.181962	0.175497	0.171283	No
RGS5	0.836662	1.19523	0.197117	0.185924	0.197415	0.271222	No
SNORD25	0.83527	1.19722	0.220277	0.156536	0.0907853	0.219951	No
KCNG4	0.959278	1.04245	0.155655	0.141236	0.105313	0.122492	No
APLNR	0.797262	1.25429	0.14639	0.14061	0.182386	0.112844	No
HGF	0.937473	1.0667	0.141171	0.11596	0.150721	0.175831	No
SPATS1	0.9056	1.10424	0.123308	0.114144	0.0777847	0.0695383	No
GRAMD1B	0.986783	1.01339	0.105429	0.0704314	0.0941866	0.0755243	No
MRGPRX4	0.899849	1.1113	0.0416908	0.0257761	0.0396876	0.0420153	No
