# Supplementary material for: Enhancer-targeted genome editing selectively blocks innate resistance to oncokinase inhibition
Source: HighWire-hosted journal article supplement (doi:10.1101/gr.166231.113), 2014-01-17
Supplement: Supplemental_Table6.xlsx [file Supplemental_Table6.xlsx]

## Sheet: Sheet1
Supplementary Table 6
Primer sequences used in this study
qRT-PCR, ChIP, cloning, other primer sequences used in this study
Primer Target	Forward Primer	Reverse Primer
qRT-PCR Primers
MET	CTTGTTGCAAGGGAGAAGACTC	TAGGGTGCCAGCATTTTAGC
MITF	TGCTCCAGTTTCTTCTGTCG	AGACATGCGCTGGAACAAG
MLANA	AGAAGATGCCCACAAGAAGG	ATAAGCAGGTGGAGCATTGG
MLPH	TTCTTTTGATCGGAAATCAGTG	CATTCCTTTCCTCGCGTTG
OCA2	GCAGAACAGCATGGATATGG	CAGGACACAACCATCATTGG
TYR	TTCATCCAAAGATCTGGGCTA	CAGATCCGACTCGCTTGTTC
TYRP1	GCTCCAGACAACCTGGGATA	ACAAAGCGCCAACTACTGCT
ChIP Primers
MET +63kb DHS	ACACAGCTACGTGGGAGAGG	ATTAGACGAGGCGCTCAGAA
Cloning Primers
MET CDS	ATGAAGGCCCCCGCTGTG	TTACTTGTACAGCTCGTCCAT
MET +63kb DHS	AGAGCCATGTCAATGTAGATGAAG	TGACAGTGCCCAGGCTGT
MET +676kb DHS	TGTGTTTCTCAGACTGATGG	GAGGACTCTCAGTGGCATT
MET +251kb DHS	GAGCCTGGACAGGTTGAG	CATACTTGCCAAAGCAGTTT
MET -225kb DHS	CCCTACCCCTAACTCATCTT	CAGAAATACTGAGCCCAACT
qPCR for pGreenFire lentiviral integrants
pGreenFire Proviral Integrant	GCCTGTGCTTCTGCTAGGAT	TTTTTGGCGTCTTCCATACC
